# Supplementary material for: Asymmetric [4 + 3] cycloaddition of hydroxyphenyl indolinones to synthesize novel spirooxindoles
Source: Royal Society of Chemistry journal article supplement (doi:10.1039/d5qo00075k), 2025-01-01
Supplement: d5qo00075k1.pdf [file d5qo00075k1.pdf]

## Supporting Information

### Asymmetric [4+3] Cycloaddition of Hydroxyphenyl Indolinones to Synthesize Novel Spirooxindoles

Shuhui Huang,<sup>a</sup> Yongquan Xu,<sup>a</sup> Mohan Li,<sup>a</sup> Lihuan Liao,<sup>a</sup> and Weiwu Ren<sup>\*,a,b</sup>

<sup>a</sup> Molecular Synthesis Center & Key Laboratory of Marine Drugs, Chinese Ministry of Education, School of Medicine and Pharmacy, Ocean University of China, 5 Yushan Road, Qingdao 266003, China.

<sup>b</sup> Laboratory for Marine Drugs and Bioproducts, Qingdao Marine Science and Technology Center, Qingdao 266237, China.

Email: renweiwu@ouc.edu.cn

#### Table of Content:

|                                                            |     |
|------------------------------------------------------------|-----|
| 1. General methods .....                                   | S2  |
| 2. Experimental procedures and characterization data ..... | S2  |
| Procedure for synthesis of <b>3</b> .....                  | S2  |
| 3. Reference .....                                         | S19 |
| 4. Crystallographic data of <b>3am</b> .....               | S20 |
| 5. Copies of NMR spectra and HPLC chromatograms.....       | S22 |

## 1. General methods

Unless otherwise mentioned, all reagents were purchased from commercial suppliers without further purification. Solvent purification was conducted according to Purification of Laboratory Chemicals (Peerrin, D. D.; Armarego, W. L. and Perrins, D. R., Pergamon Press: Oxford, 1980). Reactions were monitored using Merck Kieselgel 60F<sub>254</sub> aluminium plates. TLC was visualized by UV fluorescence (254 nm) then one of the following: KMnO<sub>4</sub>, phosphomolybdic acid, ninhydrin. If not specially mentioned, flash column chromatography was performed using Yantai xinnuo Chemicals (China) (particle size 0.040-0.063 mm). NMR spectra were recorded on JEOL 400 instruments and calibrated by using residual undeuterated chloroform-*d* ( $\delta$  <sup>1</sup>H = 7.26 ppm,  $\delta$  <sup>13</sup>C = 77.0 ppm). The following abbreviations were used to explain the multiplicities: s = singlet, d = doublet, t = triplet, q = quartet, dd = double doublet, dq = double quartet, m = multiplet. Infrared (IR) spectra were recorded on an iCAN 9-T FT-IR spectrometer. High-resolution mass spectra (HRMS) were recorded on a Thermo Fisher Q Exactive Orbitrap mass spectrometer using ESI (electrosprayionization) as ionization method. X-Ray data were taken on an Agilent Supernova X-Ray diffractometer equipped with a large area CCD detector. 3-(2-Hydroxyphenyl)indolin-2-ones **1a**<sup>2</sup>, **1l-1q**<sup>2</sup> and azomethine imines **2**<sup>3</sup> are known compounds. Compounds **1b-1k** are unknown compounds which were synthesized according to the literature methods.<sup>1,2</sup> <sup>1</sup>H and <sup>13</sup>C-NMR spectra for compounds **1b-1k** cannot be obtained due to sample decomposition.

## 2. Experimental procedures and characterization data

### Procedure for synthesis of **3**

To a solution of 3-(2-hydroxyphenyl)indolin-2-one **1** (0.10 mmol, 1.0 equiv) in diethyl ether (1.5 mL) was added Ag<sub>2</sub>O (0.15 mmol, 1.5 equiv). The reaction was stirred at 40 °C in an oil bath for 3 h. Then, the solvent was removed under reduced pressure. Next, azomethine imine **2** (0.30 mmol, 3.0 equiv) and **C4** (0.01 mmol, 10 mol%) in 2-MeTHF (2.0 mL) were added and this reaction was stirred at 25 °C for 72-96 h. The reaction mixture was directly concentrated under vacuum and charged to column chromatography on aluminium oxide eluting with dichloride/ethyl acetate = 200/1 to give product **3**.

**(3*R*,15*a'**S*)-1-phenyl-8'-tosyl-8'*H*,15*a'**H*-spiro[indoline-3,9'-[1,3]dioxolo[4'',5'':4',5']benzo[1',2':6,7][1,3,4]oxadiazepino[3,2-*c*]quinazolin]-2-one (3aa)**

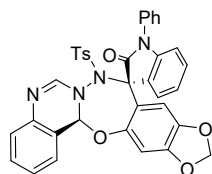

White solid, isolated yield 65% (42 mg);

m.p.: 207.7-208.1 °C;

<sup>1</sup>H NMR (400 MHz, CDCl<sub>3</sub>):  $\delta$  8.36 (d, *J* = 7.5 Hz, 1H), 7.79 (d, *J* = 8.0 Hz, 2H), 7.64-7.58 (m, 4H), 7.53-7.49 (m, 2H), 7.42 (t, *J* = 7.3 Hz, 1H), 7.35 (t, *J* = 7.3 Hz, 1H), 7.26-7.22 (m, 3H), 7.14 (q, *J* = 7.5 Hz, 2H), 6.98 (d, *J* = 8.3 Hz, 2H), 6.75 (d, *J* = 7.7 Hz, 2H), 5.89 (d, *J* = 4.5 Hz, 2H), 5.84 (s, 1H), 2.39 (s, 3H);

$^{13}\text{C}$  NMR (101 MHz,  $\text{CDCl}_3$ ):  $\delta$  174.8, 150.2, 148.9, 146.6, 145.5, 145.2, 142.6, 139.3, 134.4, 131.0, 130.9, 130.0, 129.9, 129.7, 128.83, 128.77 (2C), 128.3, 127.2, 126.6, 125.9, 124.3, 123.9, 121.7, 120.4, 110.2, 107.1, 105.9, 102.1, 87.4, 76.0, 21.7;

IR (neat):  $\nu$  3459, 2929, 2859, 1729, 1626, 1482, 1372, 1263, 1169, 1030  $\text{cm}^{-1}$ ;

HRMS (ESI):  $m/z$   $[\text{M} + \text{H}]^+$  calcd. for  $\text{C}_{36}\text{H}_{26}\text{N}_4\text{O}_6\text{S}$ : 643.1646; found: 643.1639;

$[\alpha]_{\text{D}}^{20} = -109.0$  ( $c = 0.1$ ,  $\text{CH}_2\text{Cl}_2$ );

The enantiomeric ratio of the product was determined by HPLC (Column Daicel Chiralcel IA;  $i\text{PrOH/Hexane} = 50/50$ ; flow rate = 1.0 mL/min;  $t_{\text{R}1} = 13.63$  min, 0.6%;  $t_{\text{R}2} = 28.35$  min, 99.4%).

**(3*R*,15*a*'*S*)-5-methyl-1-phenyl-8'-tosyl-8'*H*,15*a*'*H*-spiro[indoline-3,9'-[1,3]dioxolo[4'',5'':4',5']benzo[1',2':6,7][1,3,4]oxadiazepino[3,2-*c*]quinazolin]-2-one (3ba)**

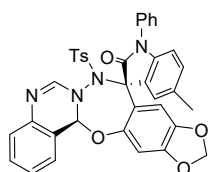

White solid, isolated yield 71% (46 mg);

m.p.: 218.2-218.5  $^{\circ}\text{C}$ ;

$^1\text{H}$  NMR (400 MHz,  $\text{CDCl}_3$ ):  $\delta$  8.12 (s, 1H), 7.78 (d,  $J = 8.3$  Hz, 2H), 7.63-7.57 (m, 4H), 7.54-7.50 (m, 2H), 7.42 (td,  $J = 7.5, 1.5$  Hz, 1H), 7.35 (td,  $J = 7.5, 1.2$  Hz, 1H), 7.26 (s, 1H), 7.24 (s, 1H), 7.10 (d,  $J = 7.7$  Hz, 1H), 7.05 (d,  $J = 7.9$  Hz, 1H), 7.00 (s, 1H), 6.96 (s, 1H), 6.72 (s, 1H), 6.65 (d,  $J = 8.0$  Hz, 1H), 5.89 (s, 1H), 5.88 (d,  $J = 1.4$  Hz, 1H), 5.84 (d,  $J = 1.4$  Hz, 1H), 2.40 (s, 3H), 2.37 (s, 3H);

$^{13}\text{C}$  NMR (101 MHz,  $\text{CDCl}_3$ ):  $\delta$  174.7, 150.3, 148.8, 146.5, 145.5, 145.1, 140.2, 139.3, 134.60, 134.55, 133.5, 130.92, 130.88, 130.1, 129.9, 129.8, 128.8, 128.7, 128.3, 127.1, 126.6, 125.9, 124.9, 121.9, 120.4, 109.9, 107.1, 105.9, 102.0, 87.4, 76.2, 21.7, 21.4;

IR (neat):  $\nu$  3454, 2931, 2862, 1607, 1350, 1267, 1175, 1097, 1023, 806  $\text{cm}^{-1}$ ;

HRMS (ESI):  $m/z$   $[\text{M} + \text{H}]^+$  calcd. for  $\text{C}_{37}\text{H}_{28}\text{N}_4\text{O}_6\text{S}$ : 657.1802; found: 657.1795;

$[\alpha]_{\text{D}}^{20} = -145.6$  ( $c = 0.1$ ,  $\text{CH}_2\text{Cl}_2$ );

The enantiomeric ratio of the product was determined by HPLC (Column Daicel Chiralcel IA;  $i\text{PrOH/Hexane} = 50/50$ ; flow rate = 1.0 mL/min;  $t_{\text{R}1} = 11.20$  min, 0.7%;  $t_{\text{R}2} = 23.95$  min, 99.3%).

**(3*R*,15*a*'*S*)-5-methoxy-1-phenyl-8'-tosyl-8'*H*,15*a*'*H*-spiro[indoline-3,9'-[1,3]dioxolo[4'',5'':4',5']benzo[1',2':6,7][1,3,4]oxadiazepino[3,2-*c*]quinazolin]-2-one (3ca)**

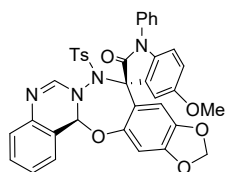

White solid, isolated yield 73% (49 mg);

m.p.: 165.4-165.8 °C;

<sup>1</sup>H NMR (400 MHz, CDCl<sub>3</sub>): δ 7.99 (d, *J* = 2.56 Hz, 1H), 7.80 (d, *J* = 8.4 Hz, 2H), 7.63-7.58 (m, 4H), 7.52-7.48 (m, 2H), 7.41 (td, *J* = 7.5, 1.6 Hz, 1H), 7.34 (td, *J* = 7.5, 1.2 Hz, 1H), 7.27 (s, 1H), 7.25 (s, 1H), 7.10 (d, *J* = 7.8 Hz, 1H), 6.99 (s, 1H), 6.94 (s, 1H), 6.77 (dd, *J* = 8.6, 2.6 Hz, 1H), 6.73 (s, 1H), 6.67 (d, *J* = 8.6 Hz, 1H), 5.88 (s, 1H), 5.87 (d, *J* = 1.4 Hz, 1H), 5.84 (d, *J* = 1.4 Hz, 1H), 3.81 (s, 3H), 2.39 (s, 3H);

<sup>13</sup>C NMR (101 MHz, CDCl<sub>3</sub>): δ 174.4, 156.6, 150.2, 148.9, 146.5, 145.5, 145.2, 139.2, 136.0, 134.6, 134.4, 132.1, 130.9, 129.9, 129.8, 128.8, 128.6, 128.3, 127.0, 126.6, 125.8, 121.7, 120.3, 113.8, 111.6, 110.5, 107.1, 105.9, 102.0, 87.4, 76.2, 55.8, 21.7;

IR (neat): ν 3460, 2930, 2660, 1628, 1486, 1355, 1170, 1036, 904, 807 cm<sup>-1</sup>;

HRMS (ESI): *m/z* [M + H]<sup>+</sup> calcd. for C<sub>37</sub>H<sub>28</sub>N<sub>4</sub>O<sub>7</sub>S: 673.1751; found: 673.1757;

[α]<sub>D</sub><sup>20</sup> = -132.0 (*c* = 0.1, CH<sub>2</sub>Cl<sub>2</sub>);

The enantiomeric ratio of the product was determined by HPLC (Column Daicel Chiracel IA; <sup>i</sup>PrOH/Hexane = 50/50; flow rate = 1.0 mL/min; t<sub>R1</sub> = 13.57 min, 1.0%; t<sub>R2</sub> = 36.18 min, 99.0%).

**(3*R*,15*a'**S*)-5-chloro-1-phenyl-8'-tosyl-8'*H*,15*a'**H*-spiro[indoline-3,9'-[1,3]dioxolo[4'',5'':4',5']benzo[1',2':6,7][1,3,4]oxadiazepino[3,2-*c*]quinazolin]-2-one (3da)**

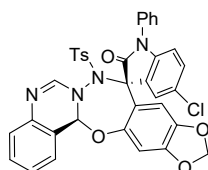

White solid, isolated yield 69% (46 mg);

m.p.: 216.2-216.5 °C;

<sup>1</sup>H NMR (400 MHz, CDCl<sub>3</sub>): δ 8.31 (d, *J* = 2.1 Hz, 1H), 7.77 (d, *J* = 8.4 Hz, 2H), 7.64-7.60 (m, 2H), 7.57-7.51 (m, 4H), 7.43 (td, *J* = 7.5, 1.6 Hz, 1H), 7.36 (td, *J* = 7.5, 1.3 Hz, 1H), 7.28 (s, 1H), 7.26 (s, 1H), 7.22 (dd, *J* = 8.4, 2.2 Hz, 1H), 7.10 (d, *J* = 7.8 Hz, 1H), 6.96 (s, 1H), 6.92 (s, 1H), 6.70 (s, 1H), 6.68 (d, *J* = 8.4 Hz, 1H), 5.90-5.89 (m, 2H), 5.86 (d, *J* = 1.4 Hz, 1H), 2.41 (s, 3H);

<sup>13</sup>C NMR (101 MHz, CDCl<sub>3</sub>): δ 174.4, 150.0, 149.1, 146.6, 145.6, 145.4, 141.2, 139.2, 134.3, 134.1, 132.3, 131.0, 130.1, 129.9, 129.6, 129.2, 129.1, 128.7, 128.4, 127.1, 126.7, 125.9, 124.7, 121.0, 120.2, 111.2, 107.0, 106.1, 102.1, 87.5, 75.7, 21.7;

IR (neat): ν 3452, 2930, 1960, 1733, 1668, 1606, 1532, 1350, 1271, 1175 cm<sup>-1</sup>;

HRMS (ESI): *m/z* [M + H]<sup>+</sup> calcd. for C<sub>36</sub>H<sub>25</sub>ClN<sub>4</sub>O<sub>6</sub>S: 677.1256; found: 677.1252;

[α]<sub>D</sub><sup>20</sup> = -65.0 (*c* = 0.1, CH<sub>2</sub>Cl<sub>2</sub>);

The enantiomeric ratio of the product was determined by HPLC (Column Daicel Chiracel IA; <sup>i</sup>PrOH/Hexane = 50/50; flow rate = 1.0 mL/min; t<sub>R1</sub> = 16.51 min, 2.1%; t<sub>R2</sub> = 22.81 min, 97.9%).



**(3*R*,15*a*'*S*)-5-bromo-1-phenyl-8'-tosyl-8'*H*,15*a*'*H*-spiro[indoline-3,9'-[1,3]dioxolo[4'',5'':4',5']benzo[1',2':6,7][1,3,4]oxadiazepino[3,2-*c*]quinazolin]-2-one (3ea)**

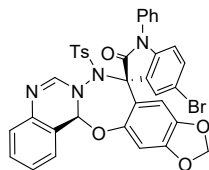

White solid, isolated yield 60% (43 mg);

m.p.: 220.9-221.2 °C;

<sup>1</sup>H NMR (400 MHz, CDCl<sub>3</sub>): δ 8.42 (d, *J* = 1.9 Hz, 1H), 7.76 (d, *J* = 8.8 Hz, 2H), 7.64-7.60 (m, 2H), 7.56-7.52 (m, 4H), 7.43 (td, *J* = 7.5, 1.4 Hz, 1H), 7.37-7.32 (m, 2H), 7.29 (s, 1H), 7.26 (s, 1H), 7.10 (d, *J* = 7.6 Hz, 1H), 6.98 (s, 1H), 6.89 (s, 1H), 6.69 (s, 1H), 6.63 (d, *J* = 8 Hz, 1H), 5.90-5.89 (m, 2H), 5.86 (d, *J* = 1.2 Hz, 1H), 2.41 (s, 3H);

<sup>13</sup>C NMR (101 MHz, CDCl<sub>3</sub>): δ 174.3, 150.0, 149.1, 146.6, 145.6, 145.4, 141.7, 139.2, 134.4, 134.1, 132.6 (2C), 131.0, 130.1, 130.0, 129.1, 128.7, 128.4, 127.4, 127.1, 126.7, 125.9, 121.0, 120.2, 116.5, 111.7, 107.0, 106.1, 102.2, 87.4, 75.6, 21.7;

IR (neat): ν 3467, 2967, 2929, 1626, 1407, 1264, 1095, 1021, 802, 754 cm<sup>-1</sup>;

HRMS (ESI): *m/z* [M + H]<sup>+</sup> calcd. for C<sub>36</sub>H<sub>25</sub>BrN<sub>4</sub>O<sub>6</sub>S: 721.0751; found: 721.0749;

[α]<sub>D</sub><sup>20</sup> = -128.6 (*c* = 0.1, CH<sub>2</sub>Cl<sub>2</sub>);

The enantiomeric ratio of the product was determined by HPLC (Column Daicel Chiracel IA; <sup>i</sup>PrOH/Hexane = 50/50; flow rate = 1.0 mL/min; *t*<sub>R1</sub> = 16.49 min, 8.7%; *t*<sub>R2</sub> = 22.33 min, 91.3%).

**(3*R*,15*a*'*S*)-5-iodo-1-phenyl-8'-tosyl-8'*H*,15*a*'*H*-spiro[indoline-3,9'-[1,3]dioxolo[4'',5'':4',5']benzo[1',2':6,7][1,3,4]oxadiazepino[3,2-*c*]quinazolin]-2-one (3fa)**

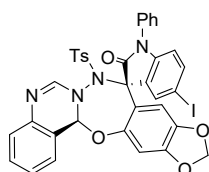

White solid, isolated yield 65% (50 mg);

m.p.: 224.7-225.1 °C;

<sup>1</sup>H NMR (400 MHz, CDCl<sub>3</sub>): δ 8.53 (s, 1H), 7.74 (d, *J* = 8.1 Hz, 2H), 7.64-7.60 (m, 2H), 7.56-7.52 (m, 4H), 7.43 (t, *J* = 7.5 Hz, 1H), 7.36 (t, *J* = 7.5 Hz, 1H), 7.29-7.26 (m, 3H), 7.12 (d, *J* = 7.6 Hz, 1H), 7.03 (s, 1H), 6.84 (s, 1H), 6.68 (s, 1H), 6.53 (d, *J* = 8.2 Hz, 1H), 5.90-5.89 (m, 2H), 5.86 (s, 1H), 2.42 (s, 3H);

<sup>13</sup>C NMR (101 MHz, CDCl<sub>3</sub>) δ 174.1, 150.1, 149.1, 146.5, 145.6, 145.4, 142.5, 139.2, 138.5, 134.4, 134.0, 132.9, 132.8, 131.0, 130.1, 130.0, 129.1, 128.6, 128.4, 127.1, 126.7, 125.9, 121.1, 120.2, 112.2, 106.9, 106.1, 102.1, 87.4, 86.7, 75.4, 21.8;

IR (neat):  $\nu$  3453, 2930, 1610, 1534, 1350, 1263, 1176, 1095, 1022, 753  $\text{cm}^{-1}$ ;

HRMS (ESI):  $m/z$   $[M + H]^+$  calcd. for  $\text{C}_{36}\text{H}_{25}\text{N}_4\text{O}_6\text{S}$ : 769.0612; found: 769.0605;

$[\alpha]_D^{20} = -64.0$  ( $c = 0.1$ ,  $\text{CH}_2\text{Cl}_2$ );

The enantiomeric ratio of the product was determined by HPLC (Column Daicel Chiracel IA;  $^i\text{PrOH/Hexane} = 50/50$ ; flow rate = 1.0 mL/min;  $t_{R1} = 17.18$  min, 2.6%;  $t_{R2} = 22.72$  min, 97.4%).

**(3*R*,15*a*'*S*)-6-methoxy-1-phenyl-8'-tosyl-8'*H*,15*a*'*H*-spiro[indoline-3,9'-[1,3]dioxolo[4'',5'':4',5']benzo[1',2':6,7][1,3,4]oxadiazepino[3,2-*c*]quinazolin]-2-one (3ga)**

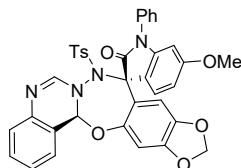

White solid, isolated yield 75% (50 mg);

m.p.: 213.5-213.8  $^{\circ}\text{C}$ ;

$^1\text{H}$  NMR (400 MHz,  $\text{CDCl}_3$ ):  $\delta$  8.27 (d,  $J = 8.5$  Hz, 1H), 7.80 (d,  $J = 8.2$  Hz, 2H), 7.63-7.57 (m, 4H), 7.53-7.49 (m, 2H), 7.41 (t,  $J = 7.4$  Hz, 1H), 7.34 (t,  $J = 7.4$  Hz, 1H), 7.26 (s, 1H), 7.24 (s, 1H), 7.09 (d,  $J = 7.7$  Hz, 1H), 6.96 (d,  $J = 11.2$  Hz, 2H), 6.71 (s, 1H), 6.62 (dd,  $J = 8.5, 2.2$  Hz, 1H), 6.29 (d,  $J = 2.2$  Hz, 1H), 5.88-5.87 (m, 2H), 5.84 (s, 1H), 3.73 (s, 3H), 2.39 (s, 3H);

$^{13}\text{C}$  NMR (101 MHz,  $\text{CDCl}_3$ ):  $\delta$  175.2, 161.0, 150.2, 148.7, 146.4, 145.4, 145.1, 144.1, 139.3, 134.5, 134.3, 130.9, 130.0, 129.9, 128.9, 128.7, 128.3, 127.2, 126.6, 125.8, 125.3, 123.0, 122.1, 120.4, 108.0, 107.0, 105.8, 102.0, 97.7, 87.4, 75.7, 55.4, 21.7;

IR (neat):  $\nu$  3466, 2968, 2928, 1626, 1533, 1351, 1262, 1095, 1022, 801  $\text{cm}^{-1}$ ;

HRMS (ESI):  $m/z$   $[M + H]^+$  calcd. for  $\text{C}_{37}\text{H}_{28}\text{N}_4\text{O}_7\text{S}$ : 673.1751; found: 673.1757;

$[\alpha]_D^{20} = -165.0$  ( $c = 0.1$ ,  $\text{CH}_2\text{Cl}_2$ );

The enantiomeric ratio of the product was determined by HPLC (Column Daicel Chiracel IA;  $^i\text{PrOH/Hexane} = 50/50$ ; flow rate = 1.0 mL/min;  $t_{R1} = 22.22$  min, 0.5%;  $t_{R2} = 38.84$  min, 99.5%).

**(3*R*,15*a*'*S*)-6-bromo-1-phenyl-8'-tosyl-8'*H*,15*a*'*H*-spiro[indoline-3,9'-[1,3]dioxolo[4'',5'':4',5']benzo[1',2':6,7][1,3,4]oxadiazepino[3,2-*c*]quinazolin]-2-one (3ha)**

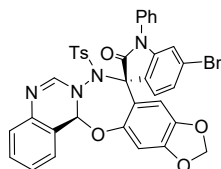

White solid, isolated yield 62% (44 mg);

m.p.: 202.5-202.9  $^{\circ}\text{C}$ ;

$^1\text{H}$  NMR (400 MHz,  $\text{CDCl}_3$ ):  $\delta$  8.25 (d,  $J = 8.2$  Hz, 1H), 7.80 (d,  $J = 8.2$  Hz, 2H), 7.66-7.62 (m, 2H), 7.57-7.49 (m, 4H), 7.42 (t,  $J = 7.1$  Hz, 1H), 7.35 (t,  $J = 7.4$  Hz, 1H), 7.28-7.26 (m, 1H), 7.26-7.24 (m, 2H), 7.09 (d,  $J = 7.7$  Hz, 1H), 6.96 (s, 1H), 6.91 (s, 1H), 6.86 (s, 1H), 6.69 (s, 1H), 5.88 (s, 2H), 5.85 (s, 1H), 2.40 (s, 3H);

$^{13}\text{C}$  NMR (101 MHz,  $\text{CDCl}_3$ )  $\delta$  174.6, 149.9, 149.1, 146.5, 145.6, 145.4, 143.8, 139.2, 134.1, 133.9, 131.0, 130.2, 129.93, 129.91, 129.2, 128.8, 128.3, 127.2, 126.8, 126.7, 125.9, 125.6, 123.4, 121.0, 120.2, 113.6, 107.0, 105.9, 102.1, 87.5, 75.5, 21.7;

IR (neat):  $\nu$  3642, 2901, 2856, 1856, 1658, 1521, 1284, 1010, 874, 812  $\text{cm}^{-1}$ ;

HRMS (ESI):  $m/z$   $[\text{M} + \text{H}]^+$  calcd. for  $\text{C}_{36}\text{H}_{25}\text{BrN}_4\text{O}_6\text{S}$ : 721.0751; found: 721.0749;

$[\alpha]_{\text{D}}^{20} = -50.3$  ( $c = 0.1$ ,  $\text{CH}_2\text{Cl}_2$ );

The enantiomeric ratio of the product was determined by HPLC (Column Daicel Chiralcel IA;  $^i\text{PrOH/Hexane} = 50/50$ ; flow rate = 1.0 mL/min;  $t_{\text{R}1} = 24.96$  min, 1.4%;  $t_{\text{R}2} = 28.10$  min, 98.6%).

**(3*R*,15*a*'*S*)-4-methyl-1-phenyl-8'-tosyl-8'*H*,15*a*'*H*-spiro[indoline-3,9'-[1,3]dioxolo[4'',5'':4',5']benzo[1',2':6,7][1,3,4]oxadiazepino[3,2-*c*]quinazolin]-2-one (3ia)**

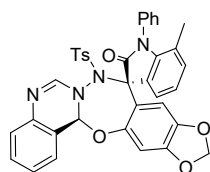

White solid, isolated yield 71% (46 mg);

m.p.: 157.5-157.8  $^{\circ}\text{C}$ ;

$^1\text{H}$  NMR (400 MHz,  $\text{CDCl}_3$ )  $\delta$  8.27 (d,  $J = 6.9$  Hz, 1H), 7.77 (d,  $J = 8.2$  Hz, 2H), 7.63-7.49 (m, 6H), 7.41 (t,  $J = 7.4$  Hz, 1H), 7.34 (m, 1H), 7.24 (d,  $J = 8.2$  Hz, 2H), 7.10-7.05 (m, 1H), 7.03-7.00 (m, 2H), 6.97 (d,  $J = 6.0$  Hz, 2H), 6.75 (s, 1H), 5.88-5.84 (m, 3H), 2.38 (s, 3H), 1.69 (s, 3H);

$^{13}\text{C}$  NMR (101 MHz,  $\text{CDCl}_3$ ):  $\delta$  176.4, 150.2, 148.8, 146.4, 145.4, 145.1, 139.6, 139.3, 137.2, 134.4, 133.5, 132.1, 130.8, 129.8, 129.4, 129.1, 129.0, 128.8, 128.5, 128.3, 126.6, 125.8, 123.7, 121.9, 121.2, 120.4, 107.0, 105.9, 102.0, 87.5, 76.0, 21.7, 18.8;

IR (neat):  $\nu$  3641, 2930, 1741, 1704, 1625, 1544, 1458, 1347, 1174, 993  $\text{cm}^{-1}$ ;

HRMS (ESI):  $m/z$   $[\text{M} + \text{H}]^+$  calcd. for  $\text{C}_{37}\text{H}_{28}\text{N}_4\text{O}_6\text{S}$ : 657.1802; found: 657.1795;

$[\alpha]_{\text{D}}^{20} = -46.0$  ( $c = 0.1$ ,  $\text{CH}_2\text{Cl}_2$ );

The enantiomeric ratio of the product was determined by HPLC (Column Daicel Chiralcel IA;  $^i\text{PrOH/Hexane} = 50/50$ ; flow rate = 1.0 mL/min;  $t_{\text{R}1} = 10.82$  min, 5.6%;  $t_{\text{R}2} = 52.36$  min, 94.4%).

**(3*S*,15*a*'*S*)-4-chloro-1-phenyl-8'-tosyl-8'*H*,15*a*'*H*-spiro[indoline-3,9'-[1,3]dioxolo[4'',5'':4',5']benzo[1',2':6,7][1,3,4]oxadiazepino[3,2-*c*]quinazolin]-2-one (3ja)**

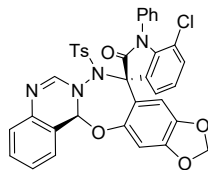

White solid, isolated yield 73% (49 mg);

m.p.: 205.9-206.3 °C;

<sup>1</sup>H NMR (400 MHz, CDCl<sub>3</sub>): δ 8.31 (d, *J* = 8.2 Hz, 1H), 7.80 (d, *J* = 8.3 Hz, 2H), 7.66-7.62 (m, 2H), 7.57-7.49 (m, 4H), 7.42 (t, *J* = 7.5 Hz, 1H), 7.35-7.32 (m, 1H), 7.28 (s, 1H), 7.26 (s, 1H), 7.10-7.08 (m, 2H), 6.97 (s, 1H), 6.91 (s, 1H), 6.72 (d, *J* = 1.8 Hz, 1H), 6.69 (s, 1H), 5.89 (s, 2H), 5.85 (s, 1H), 2.40 (s, 3H);

<sup>13</sup>C NMR (101 MHz, CDCl<sub>3</sub>) δ 174.7, 149.9, 149.1, 146.5, 145.6, 145.4, 143.8, 139.2, 135.4, 134.1, 133.9, 131.0, 130.2, 129.9, 129.4, 129.2, 128.8, 128.3, 127.2, 126.7, 125.9, 125.3, 123.9, 121.1, 120.2, 110.8, 107.0, 105.9, 102.1, 87.5, 75.4, 21.7;

IR (neat): ν 3579, 2930, 2860, 1458, 1348, 1263, 1176, 1017, 857, 803 cm<sup>-1</sup>;

HRMS (ESI): *m/z* [M + H]<sup>+</sup> calcd. for C<sub>36</sub>H<sub>25</sub>ClN<sub>4</sub>O<sub>6</sub>S: 677.1256; found: 677.1252;

[α]<sub>D</sub><sup>20</sup> = -146.0 (*c* = 0.1, CH<sub>2</sub>Cl<sub>2</sub>);

The enantiomeric ratio of the product was determined by HPLC (Column Daicel Chiralcel IA; iPrOH/Hexane = 30/70; flow rate = 1.0 mL/min; *t*<sub>R1</sub> = 39.70 min, 0.2%; *t*<sub>R2</sub> = 43.93 min, 99.8%).

**(3*R*,15*a'**S*)-5,7-dimethyl-1-phenyl-8'-tosyl-8'*H*,15*a'**H*-spiro[indoline-3,9'-[1,3]dioxolo[4'',5'':4',5']benzo[1',2':6,7][1,3,4]oxadiazepino[3,2-*c*]quinazolin]-2-one (3ka)**

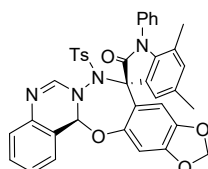

White solid, isolated yield 75% (50 mg);

m.p.: 195.4-195.9 °C;

<sup>1</sup>H NMR (400 MHz, CDCl<sub>3</sub>): δ 8.03 (s, 1H), 7.76 (d, *J* = 8.4 Hz, 2H), 7.62-7.50 (m, 6H), 7.41 (td, *J* = 7.5, 1.4 Hz, 1H), 7.34 (td, *J* = 7.4, 1.2 Hz, 1H), 7.24 (d, *J* = 8.2 Hz, 2H), 7.09 (d, *J* = 7.6 Hz, 1H), 6.99 (d, *J* = 13.2 Hz, 2H), 6.82 (s, 1H), 6.75 (s, 1H), 5.89 (s, 1H), 5.88 (d, *J* = 1.4 Hz, 1H), 5.84 (d, *J* = 1.4 Hz, 1H), 2.38 (s, 3H), 2.33 (s, 3H), 1.65 (s, 3H);

<sup>13</sup>C NMR (101 MHz, CDCl<sub>3</sub>): δ 176.3, 150.3, 148.7, 146.3, 145.4, 145.0, 139.3, 137.3, 134.5, 134.1, 133.2, 132.1, 130.8, 129.8, 129.7, 129.4, 129.0, 128.8, 128.4, 128.3, 126.5, 125.8, 122.5, 122.2, 120.8, 120.4, 107.0, 105.9, 102.0, 87.5, 76.2, 21.7, 21.1, 18.6;

IR (neat): ν 3469, 2912, 2854, 1562, 1318, 1263, 1107, 1017, 956, 823 cm<sup>-1</sup>;

HRMS (ESI):  $m/z$   $[M + H]^+$  calcd. for  $C_{38}H_{30}N_4O_6S$ : 671.1959; found: 677.1961;

$[\alpha]_D^{20} = -78.1$  ( $c = 0.1$ ,  $CH_2Cl_2$ );

The enantiomeric ratio of the product was determined by HPLC (Column Daicel Chiracel IA;  $^iPrOH/Hexane = 50/50$ ; flow rate = 1.0 mL/min;  $t_{R1} = 8.58$  min, 2.4%;  $t_{R2} = 44.90$  min, 97.6%).

**(3*R*,15*a*'*S*)-1-methyl-8'-tosyl-8'*H*,15*a*'*H*-spiro[indoline-3,9'-[1,3]dioxolo[4'',5'':4',5']benzo[1',2':6,7][1,3,4]oxadiazepino[3,2-*c*]quinazolin]-2-one (3la)**

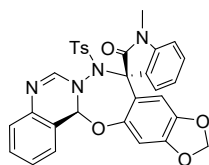

White solid, isolated yield 77% (44 mg);

m.p.: 187.7-187.9 °C;

$^1H$  NMR (400 MHz,  $CDCl_3$ ):  $\delta$  8.27 (d,  $J = 7.6$  Hz, 1H), 7.77 (d,  $J = 8.3$  Hz, 2H), 7.49 (dd,  $J = 7.6$ , 1.3 Hz, 1H), 7.41-7.26 (m, 5H), 7.12-7.08 (m, 2H), 6.98 (s, 1H), 6.90 (d,  $J = 8.3$  Hz, 2H), 6.55 (s, 1H), 5.85 (s, 2H), 5.80 (d,  $J = 1.4$  Hz, 1H), 3.44 (s, 3H), 2.40 (s, 3H);

$^{13}C$  NMR (101 MHz,  $CDCl_3$ )  $\delta$  174.9, 150.2, 148.7, 146.5, 145.3, 145.1, 142.0, 139.2, 134.5, 131.3, 130.8, 129.8, 129.7, 128.7, 128.2, 126.6, 125.8, 124.0, 123.5, 121.5, 120.4, 108.9, 107.1, 105.7, 102.0, 87.4, 75.9, 27.1, 21.7.;

IR (neat):  $\nu$  3521, 2864, 2791, 1554, 1385, 1172, 1075, 1042, 908, 707  $cm^{-1}$ ;

HRMS (ESI):  $m/z$   $[M + H]^+$  calcd. for  $C_{31}H_{24}N_4O_6S$ : 581.1489; found: 581.1484;

$[\alpha]_D^{20} = -168.0$  ( $c = 0.1$ ,  $CH_2Cl_2$ );

The enantiomeric ratio of the product was determined by HPLC (Column Daicel Chiracel IA;  $^iPrOH/Hexane = 50/50$ ; flow rate = 1.0 mL/min;  $t_{R1} = 18.57$  min, 4.6%;  $t_{R2} = 29.39$  min, 95.4%).

**(3*R*,15*a*'*S*)-1-ethyl-8'-tosyl-8'*H*,15*a*'*H*-spiro[indoline-3,9'-[1,3]dioxolo[4'',5'':4',5']benzo[1',2':6,7][1,3,4]oxadiazepino[3,2-*c*]quinazolin]-2-one (3ma)**

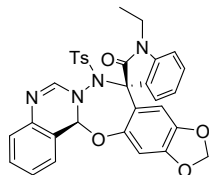

White solid, isolated yield 73% (43 mg);

m.p.: 186.4-186.7 °C;

$^1H$  NMR (400 MHz,  $CDCl_3$ ):  $\delta$  8.30 (d,  $J = 7.6$  Hz, 1H), 7.79 (d,  $J = 8.2$  Hz, 2H), 7.49 (d,  $J = 7.2$  Hz, 1H), 7.41-7.37 (m, 1H), 7.33-7.28 (m, 4H), 7.10-7.07 (m, 2H), 6.96 (s, 1H), 6.92-6.89 (m, 2H), 6.54 (s, 1H), 5.85 (s, 2H), 5.80 (s, 1H), 4.10-4.02 (m, 1H), 3.96-3.87 (m, 1H), 2.40 (s, 3H), 1.45 (t,  $J = 7.2$  Hz, 3H);

$^{13}\text{C}$  NMR (101 MHz,  $\text{CDCl}_3$ )  $\delta$  174.5, 150.2, 148.7, 146.6, 145.3, 145.1, 141.0, 139.3, 134.5, 131.6, 130.8, 129.8, 129.7, 128.7, 128.3, 126.6, 125.8, 124.2, 123.4, 121.7, 120.4, 109.0, 107.0, 105.8, 102.0, 87.4, 75.9, 35.6, 21.7, 12.3;

IR (neat):  $\nu$  3457, 2930, 2861, 1454, 1401, 1270, 1175, 1022, 808, 757  $\text{cm}^{-1}$ ;

HRMS (ESI):  $m/z$   $[\text{M} + \text{H}]^+$  calcd. for  $\text{C}_{32}\text{H}_{26}\text{N}_4\text{O}_6\text{S}$ : 595.1646; found: 595.1645;

$[\alpha]_{\text{D}}^{20} = -125.1$  ( $c = 0.1$ ,  $\text{CH}_2\text{Cl}_2$ );

The enantiomeric ratio of the product was determined by HPLC (Column Daicel Chiracel IA;  $\text{PrOH/Hexane} = 50/50$ ; flow rate = 1.0 mL/min;  $t_{\text{R}1} = 13.22$  min, 4.6%;  $t_{\text{R}2} = 46.42$  min, 95.4%).

**(3*R*,15*a'**S*)-1-isopropyl-8'-tosyl-8'*H*,15*a'**H*-spiro[indoline-3,9'-[1,3]dioxolo[4'',5'':4',5']benzo[1',2':6,7][1,3,4]oxadiazepino[3,2-*c*]quinazolin]-2-one (3na)**

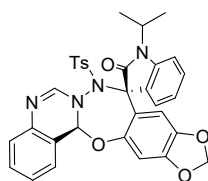

White solid, isolated yield 73% (44 mg);

m.p.: 203.5-203.8  $^{\circ}\text{C}$ ;

$^1\text{H}$  NMR (400 MHz,  $\text{CDCl}_3$ ):  $\delta$  8.31 (d,  $J = 7.6$  Hz, 1H), 7.78 (d,  $J = 8.3$  Hz, 2H), 7.48 (dd,  $J = 7.5, 1.2$  Hz, 1H), 7.41 (td,  $J = 7.5, 1.5$  Hz, 1H), 7.33-7.28 (m, 4H), 7.10-6.99 (m, 4H), 6.88 (s, 1H), 6.55 (s, 1H), 5.85-5.84 (m, 2H), 5.80 (d,  $J = 1.3$  Hz, 1H), 4.77-4.70 (m, 1H), 2.40 (s, 3H), 1.70 (dd,  $J = 16.0, 7.0$  Hz, 6H);

$^{13}\text{C}$  NMR (101 MHz,  $\text{CDCl}_3$ )  $\delta$  174.6, 150.3, 148.7, 146.6, 145.4, 145.1, 140.9, 139.4, 134.6, 131.8, 130.9, 129.8, 129.5, 128.8, 128.3, 126.6, 125.9, 124.3, 123.1, 122.0, 120.4, 110.2, 106.9, 105.8, 102.0, 87.5, 75.7, 45.2, 21.8, 19.6, 19.0;

IR (neat):  $\nu$  3457, 2929, 2859, 1609, 1483, 1467, 1408, 1354, 1264, 753  $\text{cm}^{-1}$ ;

HRMS (ESI):  $m/z$   $[\text{M} + \text{H}]^+$  calcd. for  $\text{C}_{33}\text{H}_{28}\text{N}_4\text{O}_6\text{S}$ : 609.1802; found: 609.1789;

$[\alpha]_{\text{D}}^{20} = -96.7$  ( $c = 0.1$ ,  $\text{CH}_2\text{Cl}_2$ );

The enantiomeric ratio of the product was determined by HPLC (Column Daicel Chiracel IA;  $\text{PrOH/Hexane} = 50/50$ ; flow rate = 1.0 mL/min;  $t_{\text{R}1} = 8.64$  min, 4.4%;  $t_{\text{R}2} = 18.48$  min, 95.6%).

**(3*R*,15*a'**S*)-1-allyl-8'-tosyl-8'*H*,15*a'**H*-spiro[indoline-3,9'-[1,3]dioxolo[4'',5'':4',5']benzo[1',2':6,7][1,3,4]oxadiazepino[3,2-*c*]quinazolin]-2-one (3oa)**

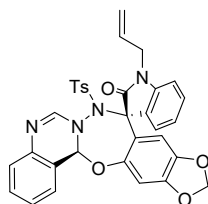

White solid, isolated yield 71% (43 mg);

m.p.: 185.2-185.6 °C;

<sup>1</sup>H NMR (400 MHz, CDCl<sub>3</sub>): δ 8.30 (d, *J* = 7.6 Hz, 1H), 7.78 (d, *J* = 8.2 Hz, 2H), 7.49 (d, *J* = 7.4 Hz, 1H), 7.41 (t, *J* = 7.4 Hz, 1H), 7.34-7.28 (m, 4H), 7.11-7.08 (m, 2H), 6.94 (s, 2H), 6.89 (d, *J* = 7.8 Hz, 1H), 6.55 (s, 1H), 6.03-5.94 (m, 1H), 5.85 (s, 2H), 5.81 (s, 1H), 5.46 (d, *J* = 17.2 Hz, 1H), 5.33 (d, *J* = 10.4 Hz, 1H), 4.63-4.52 (m, 2H), 2.40 (s, 3H);

<sup>13</sup>C NMR (101 MHz, CDCl<sub>3</sub>) δ 174.6, 150.1, 148.8, 146.6, 145.4, 145.1, 141.1, 139.3, 134.5, 131.4, 131.1, 130.9, 129.8, 129.6, 128.7, 128.3, 126.6, 125.8, 124.0, 123.6, 121.6, 120.4, 118.1, 109.8, 107.0, 105.8, 102.0, 87.5, 76.0, 43.2, 21.7;

IR (neat): ν 3450, 2929, 2861, 1635, 1537, 1460, 1352, 1270, 1174, 756 cm<sup>-1</sup>;

HRMS (ESI): *m/z* [M + H]<sup>+</sup> calcd. for C<sub>33</sub>H<sub>26</sub>N<sub>4</sub>O<sub>6</sub>S: 607.1646; found: 607.1634;

[α]<sub>D</sub><sup>20</sup> = -96.0 (*c* = 0.1, CH<sub>2</sub>Cl<sub>2</sub>);

The enantiomeric ratio of the product was determined by HPLC (Column Daicel Chiracel IA; <sup>i</sup>PrOH/Hexane = 50/50; flow rate = 1.0 mL/min; t<sub>R1</sub> = 15.39 min, 4.1%; t<sub>R2</sub> = 43.28 min, 95.9%).

**(3*R*,15*a'**S*)-1-(cyclopropylmethyl)-8'-tosyl-8'*H*,15*a'**H*-spiro[indoline-3,9'-[1,3]dioxolo[4'',5'':4',5']benzo[1',2':6,7][1,3,4]oxadiazepino[3,2-*c*]quinazolin]-2-one (3pa)**

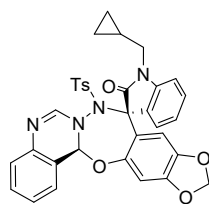

White solid, isolated yield 71% (44 mg);

m.p.: 213.4-213.6 °C;

<sup>1</sup>H NMR (400 MHz, CDCl<sub>3</sub>): δ 8.31 (d, *J* = 7.6 Hz, 1H), 7.80 (d, *J* = 8.3 Hz, 2H), 7.50 (dd, *J* = 7.5, 1.1 Hz, 1H), 7.41 (td, *J* = 7.5, 1.4 Hz, 1H), 7.33-7.28 (m, 4H), 7.11-7.08 (m, 2H), 6.98-6.95 (m, 3H), 6.60 (s, 1H), 5.86 (s, 1H), 5.84 (d, *J* = 1.3 Hz, 1H), 5.79 (d, *J* = 1.3 Hz, 1H), 3.84 (d, *J* = 7.3 Hz, 2H), 2.40 (s, 3H), 1.35-1.2 (m, 1H), 0.70-0.62 (m, 2H), 0.58-0.56 (m, 2H);

<sup>13</sup>C NMR (101 MHz, CDCl<sub>3</sub>) δ 174.8, 150.1, 148.7, 146.5, 145.3, 145.0, 141.4, 139.3, 134.5, 131.5, 130.8, 129.7, 129.6, 128.7, 128.3, 126.5, 125.8, 124.0, 123.4, 121.7, 120.4, 109.1, 107.0, 105.7, 101.9, 87.4, 76.0, 45.3, 29.6, 21.7, 9.6, 4.1;

IR (neat): ν 3449, 2930, 1625, 1532, 1351, 1264, 1176, 1019, 855, 753 cm<sup>-1</sup>;

HRMS (ESI): *m/z* [M + H]<sup>+</sup> calcd. for C<sub>34</sub>H<sub>28</sub>N<sub>4</sub>O<sub>6</sub>S: 621.1802; found: 621.1810;

[α]<sub>D</sub><sup>20</sup> = -88.0 (*c* = 0.1, CH<sub>2</sub>Cl<sub>2</sub>);

The enantiomeric ratio of the product was determined by HPLC (Column Daicel Chiracel IA; <sup>i</sup>PrOH/Hexane = 50/50; flow rate = 1.0 mL/min; t<sub>R1</sub> = 13.09 min, 6.3%; t<sub>R2</sub> = 25.31 min, 93.7%).

**(3*R*,15*a'**S*)-1-benzyl-8'-tosyl-8'*H*,15*a'**H*-spiro[indoline-3,9'-[1,3]dioxolo[4'',5'':4',5']benzo[1',2':6,7][1,3,4]oxadiazepino[3,2-*c*]quinazolin]-2-one (3qa)**

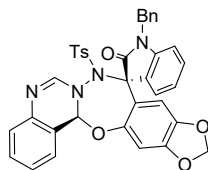

White solid, isolated yield 72% (47 mg);

m.p.: 165.1-165.4 °C;

<sup>1</sup>H NMR (400 MHz, CDCl<sub>3</sub>): δ 8.33 (d, *J* = 7.6 Hz, 1H), 7.79 (d, *J* = 8.3 Hz, 2H), 7.50-7.47 (m, 3H), 7.41-7.26 (m, 7H), 7.23 (td, *J* = 7.7, 1.1 Hz, 1H), 7.10-7.06 (m, 2H), 6.98 (d, *J* = 11.2 Hz, 2H), 6.77 (d, *J* = 7.7 Hz, 1H), 6.56 (s, 1H), 5.86-5.84 (m, 2H), 5.81 (d, *J* = 1.4 Hz, 1H), 5.26 (d, *J* = 15.9 Hz, 1H), 5.12 (d, *J* = 15.9 Hz, 1H), 2.40 (s, 3H);

<sup>13</sup>C NMR (101 MHz, CDCl<sub>3</sub>) δ 175.0, 150.1, 148.8, 146.5, 145.4, 145.1, 141.2, 139.3, 135.3, 134.4, 131.4, 130.8, 129.8, 129.6, 128.9, 128.7, 128.3, 127.7, 127.3, 126.6, 125.8, 124.0, 123.6, 121.7, 120.4, 109.9, 107.0, 105.8, 102.0, 87.5, 76.0, 44.8, 21.7;

IR (neat): ν 3461, 2928, 2859, 1662, 1626, 1607, 1408, 1382, 1264, 857 cm<sup>-1</sup>;

HRMS (ESI): *m/z* [M + H]<sup>+</sup> calcd. for C<sub>37</sub>H<sub>28</sub>N<sub>4</sub>O<sub>6</sub>S: 657.1802; found: 657.1798;

[α]<sub>D</sub><sup>20</sup> = -108.0 (*c* = 0.1, CH<sub>2</sub>Cl<sub>2</sub>);

The enantiomeric ratio of the product was determined by HPLC (Column Daicel Chiracel IA; <sup>t</sup>PrOH/Hexane = 50/50; flow rate = 1.0 mL/min; t<sub>R1</sub> = 23.14 min, 4.6%; t<sub>R2</sub> = 36.25 min, 95.4%).

**(3*R*,15*a'**S*)-3'-methyl-1-phenyl-8'-tosyl-8'*H*,15*a'**H*-spiro[indoline-3,9'-[1,3]dioxolo[4'',5'':4',5']benzo[1',2':6,7][1,3,4]oxadiazepino[3,2-*c*]quinazolin]-2-one (3ab)**

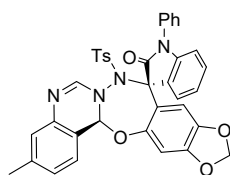

White solid, isolated yield 74% (48 mg);

m.p.: 188.6-188.9 °C;

<sup>1</sup>H NMR (400 MHz, CDCl<sub>3</sub>): δ 8.37 (d, *J* = 7.0 Hz, 1H), 7.79 (d, *J* = 8.3 Hz, 2H), 7.64-7.57 (m, 4H), 7.53-7.49 (m, 1H), 7.39 (d, *J* = 7.8 Hz, 1H), 7.24-7.22 (m, 3H), 7.15-7.10 (m, 2H), 6.95 (s, 1H), 6.93 (s, 1H), 6.89 (s, 1H), 6.75 (d, *J* = 7.2 Hz, 2H), 5.92 (s, 1H), 5.88 (d, *J* = 1.4 Hz, 1H), 5.84 (d, *J* = 1.4 Hz, 1H), 2.39 (s, 3H), 2.36 (s, 3H);

<sup>13</sup>C NMR (101 MHz, CDCl<sub>3</sub>) δ 174.8, 150.2, 148.8, 146.6, 145.4, 145.1, 142.6, 141.1, 139.1, 134.4, 131.0, 129.9 (2C), 129.8, 129.6, 128.81, 128.75, 128.1, 127.6, 127.2, 126.2, 124.3, 123.9, 121.7, 117.5, 110.2, 107.1, 106.0, 102.0, 87.5, 76.0, 21.7, 21.3;



IR (neat):  $\nu$  3449, 2932, 2863, 1637, 1477, 1448, 1377, 1270, 756, 656  $\text{cm}^{-1}$ ;

HRMS (ESI):  $m/z$   $[M + H]^+$  calcd. for  $\text{C}_{37}\text{H}_{28}\text{N}_4\text{O}_6\text{S}$ : 657.1802; found: 657.1795;

$[\alpha]_{\text{D}}^{20} = -181.7$  ( $c = 0.1$ ,  $\text{CH}_2\text{Cl}_2$ );

The enantiomeric ratio of the product was determined by HPLC (Column Daicel Chiracel IA;  $^i\text{PrOH/Hexane} = 50/50$ ; flow rate = 1.0 mL/min;  $t_{\text{R}1} = 8.10$  min, 92.3%;  $t_{\text{R}2} = 10.30$  min, 7.7%).

**(3*R*,15*a*'*S*)-3'-fluoro-1-phenyl-8'-tosyl-8'*H*,15*a*'*H*-spiro[indoline-3,9'-[1,3]dioxolo[4'',5'':4',5']benzo[1',2':6,7][1,3,4]oxadiazepino[3,2-*c*]quinazolin]-2-one (3ac)**

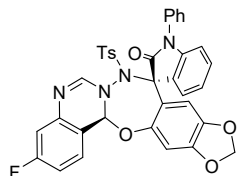

White solid, isolated yield 74% (48 mg);

m.p.: 217.9-217.3  $^{\circ}\text{C}$ ;

$^1\text{H}$  NMR (400 MHz,  $\text{CDCl}_3$ ):  $\delta$  8.33 (d,  $J = 7.6$  Hz, 1H), 7.79 (d,  $J = 8.0$  Hz, 2H), 7.64-7.57 (m, 4H), 7.54-7.45 (m, 2H), 7.27 (s, 1H), 7.26-7.22 (m, 2H), 7.14 (t,  $J = 7.6$  Hz, 1H), 7.06-7.00 (m, 2H), 6.92 (s, 1H), 6.80-6.73 (m, 3H), 5.90-5.89 (m, 2H), 5.85 (s, 1H), 2.40 (s, 3H);

$^{13}\text{C}$  NMR (101 MHz,  $\text{CDCl}_3$ )  $\delta$  174.7, 165.1 (d,  $J = 250.0$  Hz), 151.1, 149.0, 146.3, 145.6, 145.3, 142.6, 141.3 (d,  $J = 11.6$  Hz), 134.4, 134.3, 130.8, 130.0, 129.9, 129.8, 129.7, 128.9, 128.7, 127.2, 124.3, 124.0, 121.6, 116.5 (d,  $J = 2.8$  Hz), 114.2 (d,  $J = 22.7$  Hz), 112.4 (d,  $J = 22.4$  Hz), 110.2, 107.2, 105.8, 102.1, 87.0, 76.0, 21.7;

IR (neat):  $\nu$  3447, 2928, 2859, 1728, 1664, 1602, 1382, 1264, 857, 753  $\text{cm}^{-1}$ ;

HRMS (ESI):  $m/z$   $[M + H]^+$  calcd. for  $\text{C}_{36}\text{H}_{25}\text{FN}_4\text{O}_6\text{S}$ : 661.1552; found: 661.1554;

$[\alpha]_{\text{D}}^{20} = -163.0$  ( $c = 0.1$ ,  $\text{CH}_2\text{Cl}_2$ );

The enantiomeric ratio of the product was determined by HPLC (Column Daicel Chiracel AD;  $^i\text{PrOH/Hexane} = 50/50$ ; flow rate = 1.0 mL/min;  $t_{\text{R}1} = 26.03$  min, 99.9%;  $t_{\text{R}2} = 37.46$  min, 0.1%).

**(3*R*,15*a*'*S*)-3'-chloro-1-phenyl-8'-tosyl-8'*H*,15*a*'*H*-spiro[indoline-3,9'-[1,3]dioxolo[4'',5'':4',5']benzo[1',2':6,7][1,3,4]oxadiazepino[3,2-*c*]quinazolin]-2-one (3ad)**

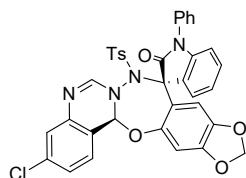

White solid, isolated yield 75% (50 mg);

m.p.: 156.9-156.4  $^{\circ}\text{C}$ ;

<sup>1</sup>H NMR (400 MHz, CDCl<sub>3</sub>): δ 8.32 (d, *J* = 7.6 Hz, 1H), 7.78 (d, *J* = 8.2 Hz, 2H), 7.64-7.57 (m, 4H), 7.53-7.50 (m, 1H), 7.44 (d, *J* = 8.2 Hz, 1H), 7.31-7.27 (m, 2H), 7.26-7.22 (m, 2H), 7.14-7.08 (m, 2H), 6.99 (s, 1H), 6.91 (s, 1H), 6.75-6.73 (m, 2H), 5.92 (s, 1H), 5.89 (s, 1H), 5.86 (s, 1H), 2.40 (s, 3H);

<sup>13</sup>C NMR (101 MHz, CDCl<sub>3</sub>) δ 174.6, 151.1, 149.0, 146.3, 145.6, 145.3, 142.6, 140.5, 136.5, 134.4, 134.3, 130.80, 129.98, 129.9, 129.8, 129.4, 128.9, 128.7, 127.2, 126.8, 125.8, 124.2, 124.0, 121.6, 118.8, 110.2, 107.2, 105.8, 102.1, 86.9, 76.0, 21.7;

IR (neat): ν 3451, 2930, 2860, 1732, 1606, 1350, 1270, 1174, 858, 756 cm<sup>-1</sup>;

HRMS (ESI): *m/z* [M + H]<sup>+</sup> calcd. for C<sub>36</sub>H<sub>25</sub>ClN<sub>4</sub>O<sub>6</sub>S: 677.1256; found: 677.1252;

[α]<sub>D</sub><sup>20</sup> = -102.3 (*c* = 0.1, CH<sub>2</sub>Cl<sub>2</sub>);

The enantiomeric ratio of the product was determined by HPLC (Column Daicel Chiracel IA; <sup>i</sup>PrOH/Hexane = 50/50; flow rate = 1.0 mL/min; *t*<sub>R1</sub> = 9.30 min, 95.6%; *t*<sub>R2</sub> = 12.84 min, 4.4%).

**(3*R*,15*a*'*S*)-3'-bromo-1-phenyl-8'-tosyl-8'*H*,15*a*'*H*-spiro[indoline-3,9'-[1,3]dioxolo[4'',5'':4',5']benzo[1',2':6,7][1,3,4]oxadiazepino[3,2-*c*]quinazolin]-2-one (3ae)**

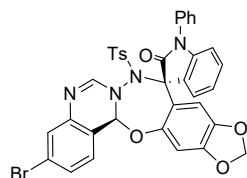

White solid, isolated yield 74% (53 mg);

m.p.: 144.5-144.8 °C;

<sup>1</sup>H NMR (400 MHz, CDCl<sub>3</sub>): δ 8.32 (d, *J* = 7.4 Hz, 1H), 7.78 (d, *J* = 8.3 Hz, 2H), 7.64-7.57 (m, 4H), 7.53-7.50 (m, 1H), 7.46 (dd, *J* = 8.2, 1.8 Hz, 1H), 7.37 (d, *J* = 8.2 Hz, 1H), 7.27 (s, 1H), 7.26-7.22 (m, 3H), 7.13 (t, *J* = 7.3 Hz, 1H), 6.98 (s, 1H), 6.90 (s, 1H), 6.75-6.73 (m, 2H), 5.93 (s, 1H), 5.89 (s, 1H), 5.86 (s, 1H), 2.40 (s, 3H) ;

<sup>13</sup>C NMR (101 MHz, CDCl<sub>3</sub>) δ 174.6, 151.1, 149.0, 146.3, 145.6, 145.3, 142.6, 140.6, 134.3, 134.2, 130.8, 130.0, 129.9, 129.8, 129.63, 129.58, 128.9, 128.8, 128.7, 127.2, 124.5, 124.2, 124.0, 121.5, 119.3, 110.2, 107.2, 105.8, 102.1, 86.9, 75.9, 21.7;

IR (neat): ν 3453, 2928, 2859, 1609, 1409, 1383, 1351, 1264, 1176, 752 cm<sup>-1</sup>;

HRMS (ESI): *m/z* [M + H]<sup>+</sup> calcd. for C<sub>36</sub>H<sub>25</sub>BrN<sub>4</sub>O<sub>6</sub>S: 721.0751; found: 721.0749;

[α]<sub>D</sub><sup>20</sup> = -146.7 (*c* = 0.1, CH<sub>2</sub>Cl<sub>2</sub>);

The enantiomeric ratio of the product was determined by HPLC (Column Daicel Chiracel IA; <sup>i</sup>PrOH/Hexane = 50/50; flow rate = 1.0 mL/min; *t*<sub>R1</sub> = 8.61 min, 98.8%; *t*<sub>R2</sub> = 11.48 min, 1.2%).

**(3*R*,15*a*'*S*)-2'-methoxy-1-phenyl-8'-tosyl-8'*H*,15*a*'*H*-spiro[indoline-3,9'-[1,3]dioxolo[4'',5'':4',5']benzo[1',2':6,7][1,3,4]oxadiazepino[3,2-*c*]quinazolin]-2-one (3af)**

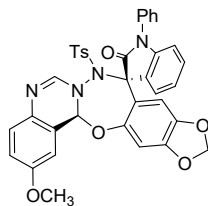

White solid, isolated yield 72% (48 mg);

m.p.: 184.1-184.7 °C;

$^1\text{H NMR}$  (400 MHz,  $\text{CDCl}_3$ ):  $\delta$  8.37 (d,  $J = 7.2$  Hz, 1H), 7.79 (d,  $J = 8.3$  Hz, 2H), 7.64-7.57 (m, 4H), 7.53-7.50 (m, 1H), 7.26-7.22 (m, 3H), 7.13 (t,  $J = 7.0$  Hz, 1H), 7.04-6.93 (m, 4H), 6.88 (s, 1H), 6.75-6.73 (m, 2H), 5.96 (s, 1H), 5.88 (d,  $J = 1.2$  Hz, 1H), 5.84 (d,  $J = 1.2$  Hz, 1H), 3.90 (s, 3H), 2.39 (s, 3H);

$^{13}\text{C NMR}$  (101 MHz,  $\text{CDCl}_3$ )  $\delta$  174.8, 158.0, 148.9, 148.2, 146.5, 145.5, 145.1, 142.6, 134.45, 134.43, 133.0, 131.0, 129.9, 129.8, 129.6, 128.8, 128.7, 127.2 (2C), 124.3, 123.9, 121.7, 121.3, 117.4, 111.9, 110.2, 107.0, 105.8, 102.0, 87.6, 76.0, 55.6, 21.7;

IR (neat):  $\nu$  3432, 2935, 2817, 1884, 1721, 1484, 1261, 1194, 1036, 834  $\text{cm}^{-1}$ ;

HRMS (ESI):  $m/z$   $[\text{M} + \text{H}]^+$  calcd. for  $\text{C}_{37}\text{H}_{28}\text{N}_4\text{O}_7\text{S}$ : 673.1751; found: 673.1757;

$[\alpha]_{\text{D}}^{20} = -158.0$  ( $c = 0.1$ ,  $\text{CH}_2\text{Cl}_2$ );

The enantiomeric ratio of the product was determined by HPLC (Column Daicel Chiralcel IA;  $^i\text{PrOH/Hexane} = 50/50$ ; flow rate = 1.0 mL/min;  $t_{\text{R}1} = 13.78$  min, 11.8%;  $t_{\text{R}2} = 24.04$  min, 88.2%).

**(3R,15a'S)-2'-fluoro-1-phenyl-8'-tosyl-8'H,15a'H-spiro[indoline-3,9'-[1,3]dioxolo[4'',5'':4',5']benzo[1',2':6,7][1,3,4]oxadiazepino[3,2-c]quinazolin]-2-one (3ag)**

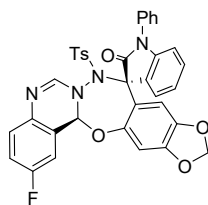

White solid, isolated yield 71% (46 mg);

m.p.: 209.1-209.5 °C;

$^1\text{H NMR}$  (400 MHz,  $\text{CDCl}_3$ ):  $\delta$  8.32 (d,  $J = 7.5$  Hz, 1H), 7.78 (d,  $J = 8.2$  Hz, 2H), 7.64-7.57 (m, 4H), 7.53-7.50 (m, 1H), 7.27 (s, 1H), 7.26-7.18 (m, 3H), 7.14-7.08 (m, 3H), 6.96 (s, 1H), 6.88 (s, 1H), 6.75-6.73 (m, 2H), 5.94 (s, 1H), 5.89 (s, 1H), 5.85 (s, 1H), 2.40 (s, 3H);

$^{13}\text{C NMR}$  (101 MHz,  $\text{CDCl}_3$ )  $\delta$  174.7, 161.8 (d,  $J = 248.1$  Hz), 149.6, 149.0, 146.3, 145.6, 145.3, 142.6, 135.8 (d,  $J = 2.8$  Hz), 134.42, 134.39, 130.8, 130.0, 129.9, 129.8, 128.9, 128.7, 127.9 (d,  $J = 8.3$  Hz), 127.2, 124.3, 124.0, 121.8 (d,  $J = 8.0$  Hz), 121.7, 118.4 (d,  $J = 22.7$  Hz), 114.5 (d,  $J = 23.6$  Hz), 110.2, 107.1, 105.8, 102.1, 86.9, 76.0, 21.7;

IR (neat):  $\nu$  3457, 2930, 2862, 1448, 1377, 1348, 1270, 1175, 858, 757  $\text{cm}^{-1}$ ;

HRMS (ESI):  $m/z$   $[\text{M} + \text{H}]^+$  calcd. for  $\text{C}_{36}\text{H}_{25}\text{FN}_4\text{O}_6\text{S}$ : 661.1552; found: 661.1554;

$[\alpha]_D^{20} = -102.7$  ( $c = 0.1$ ,  $\text{CH}_2\text{Cl}_2$ );

The enantiomeric ratio of the product was determined by HPLC (Column Daicel Chiracel IA;  $^i\text{PrOH/Hexane} = 50/50$ ; flow rate = 1.0 mL/min;  $t_{R1} = 15.61$  min, 1.5%;  $t_{R2} = 29.44$  min, 98.5%).

**(3*R*,15*a'**S*)-2'-chloro-1-phenyl-8'-tosyl-8'*H*,15*a'**H*-spiro[indoline-3,9'-[1,3]dioxolo[4'',5'':4',5']benzo[1',2':6,7][1,3,4]oxadiazepino[3,2-*c*]quinazolin]-2-one (3ah)**

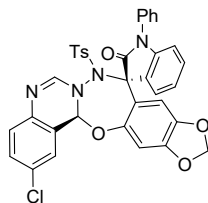

White solid, isolated yield 70% (47 mg);

m.p.: 227.1-227.3 °C;

$^1\text{H NMR}$  (400 MHz,  $\text{CDCl}_3$ ):  $\delta$  8.30 (d,  $J = 7.5$  Hz, 1H), 7.77 (d,  $J = 8.2$  Hz, 2H), 7.64-7.57 (m, 4H), 7.53-7.48 (m, 2H), 7.36 (dd,  $J = 8.5, 2.3$  Hz, 1H), 7.27 (s, 1H), 7.26-7.23 (m, 2H), 7.14 (t,  $J = 7.5$  Hz, 1H), 7.04-7.01 (m, 2H), 6.85 (s, 1H), 6.75-6.73 (m, 2H), 5.96 (s, 1H), 5.89 (d,  $J = 1.0$  Hz, 1H), 5.86 (d,  $J = 1.0$  Hz, 1H), 2.40 (s, 3H);

$^{13}\text{C NMR}$  (101 MHz,  $\text{CDCl}_3$ )  $\delta$  174.7, 150.5, 149.0, 146.3, 145.6, 145.3, 142.6, 138.0, 134.41, 134.38, 131.7, 131.1, 130.8, 130.0, 129.9, 129.8, 128.9, 128.7, 128.0, 127.4, 127.2, 124.3, 124.0, 121.8, 121.6, 110.3, 107.2, 105.8, 102.1, 86.7, 76.0, 21.7;

IR (neat):  $\nu$  3451, 2930, 2860, 1667, 1606, 1350, 1270, 1174, 1020, 756  $\text{cm}^{-1}$

HRMS (ESI):  $m/z$   $[\text{M} + \text{H}]^+$  calcd. for  $\text{C}_{36}\text{H}_{25}\text{ClN}_4\text{O}_6\text{S}$ : 677.1256; found: 677.1252;

$[\alpha]_D^{20} = -44.3$  ( $c = 0.1$ ,  $\text{CH}_2\text{Cl}_2$ );

The enantiomeric ratio of the product was determined by HPLC (Column Daicel Chiracel IA;  $^i\text{PrOH/Hexane} = 50/50$ ; flow rate = 1.0 mL/min;  $t_{R1} = 14.19$  min, 5.5%;  $t_{R2} = 17.20$  min, 94.5%).

**(3*R*,15*a'**S*)-8'-(mesitylsulfonyl)-1-phenyl-8'*H*,15*a'**H*-spiro[indoline-3,9'-[1,3]dioxolo[4'',5'':4',5']benzo[1',2':6,7][1,3,4]oxadiazepino[3,2-*c*]quinazolin]-2-one (3ai)**

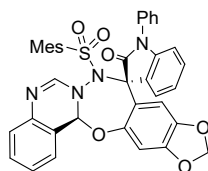

White solid, isolated yield 75% (50 mg);

m.p.: 156.2-154.4 °C;

$^1\text{H NMR}$  (400 MHz,  $\text{CDCl}_3$ ):  $\delta$  8.39 (d,  $J = 8.4$  Hz, 1H), 7.62-7.56 (m, 4H), 7.51-7.38 (m, 3H), 7.33-7.29 (m, 2H), 7.26-7.21 (m, 1H), 7.15-7.08 (m, 2H), 6.88 (s, 3H), 6.76 (d,  $J = 7.2$  Hz, 2H), 5.91 (s, 1H), 5.86 (s, 1H), 5.83 (s, 1H), 2.57-2.43 (m, 6H), 2.25 (s, 3H);

$^{13}\text{C}$  NMR (101 MHz,  $\text{CDCl}_3$ )  $\delta$  173.9, 150.5, 148.8, 146.6, 145.5, 144.0, 142.7, 141.4, 139.3, 134.3, 132.5, 131.3, 130.9, 130.1, 129.83, 129.80, 128.7, 128.0, 127.2, 126.6, 125.9, 125.5, 123.6, 121.8, 120.2, 110.0, 107.6, 105.7, 102.0, 87.0, 76.0, 22.9, 21.0;

IR (neat):  $\nu$  3460, 2929, 2859, 1353, 1244, 1172, 1093, 993, 804, 666  $\text{cm}^{-1}$ ;

HRMS (ESI):  $m/z$   $[\text{M} + \text{H}]^+$  calcd. for  $\text{C}_{38}\text{H}_{30}\text{N}_4\text{O}_6\text{S}$ : 671.1959; found: 671.1956;

$[\alpha]_{\text{D}}^{20} = -167.0$  ( $c = 0.1$ ,  $\text{CH}_2\text{Cl}_2$ );

The enantiomeric ratio of the product was determined by HPLC (Column Daicel Chiralcel IA;  $i$ PrOH/Hexane = 50/50; flow rate = 1.0 mL/min;  $t_{\text{R}1} = 9.84$  min, 6.3%;  $t_{\text{R}2} = 23.44$  min, 93.7%).

**(3*R*,15*a*'*S*)-1-phenyl-8'-(*o*-tolylsulfonyl)-8'*H*,15*a*'*H*-spiro[indoline-3,9'-[1,3]dioxolo[4'',5'':4',5']benzo[1',2':6,7][1,3,4]oxadiazepino[3,2-*c*]quinazolin]-2-one (3aj)**

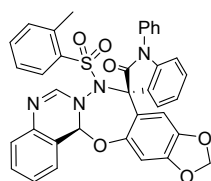

White solid, isolated yield 72% (46 mg);

m.p.: 209.8-210.2  $^{\circ}\text{C}$ ;

$^1\text{H}$  NMR (400 MHz,  $\text{CDCl}_3$ ):  $\delta$  8.36 (d,  $J = 7.6$  Hz, 1H), 7.88 (d,  $J = 9.0$  Hz, 1H), 7.64-7.58 (m, 4H), 7.52-7.41 (m, 4H), 7.35-7.30 (m, 2H), 7.25-7.22 (m, 2H), 7.14-7.10 (m, 2H), 7.00 (s, 1H), 6.95 (s, 1H), 6.76 (d,  $J = 7.8$  Hz, 1H), 6.73 (s, 1H), 5.90 (s, 1H), 5.87 (d,  $J = 1.4$  Hz, 1H), 5.84 (d,  $J = 1.4$  Hz, 1H), 2.51 (s, 3H);

$^{13}\text{C}$  NMR (101 MHz,  $\text{CDCl}_3$ ):  $\delta$  174.3, 150.0, 148.9, 146.6, 145.5, 142.7, 139.3, 139.2, 135.8, 134.4, 134.1, 132.9, 131.0, 130.8, 130.4, 129.9, 129.8, 128.8, 128.2, 127.2, 126.9, 126.7, 126.0, 124.7, 123.8, 121.6, 120.2, 110.1, 107.3, 105.8, 102.0, 87.2, 76.0, 20.9;

IR (neat):  $\nu$  3529, 2939, 2819, 1829, 1636, 1382, 1312, 1153, 1067, 759  $\text{cm}^{-1}$ ;

HRMS (ESI):  $m/z$   $[\text{M} + \text{H}]^+$  calcd. for  $\text{C}_{36}\text{H}_{26}\text{N}_4\text{O}_6\text{S}$ : 643.1646; found: 643.1639;

$[\alpha]_{\text{D}}^{20} = -179.3$  ( $c = 0.1$ ,  $\text{CH}_2\text{Cl}_2$ );

The enantiomeric ratio of the product was determined by HPLC (Column Daicel Chiralcel IA;  $i$ PrOH/Hexane = 50/50; flow rate = 1.0 mL/min;  $t_{\text{R}1} = 11.24$  min, 5.3%;  $t_{\text{R}2} = 28.22$  min, 94.7%).

**(3*R*,15*a*'*S*)-8'-((4-(*tert*-butyl)phenyl)sulfonyl)-1-phenyl-8'*H*,15*a*'*H*-spiro[indoline-3,9'-[1,3]dioxolo[4'',5'':4',5']benzo[1',2':6,7][1,3,4]oxadiazepino[3,2-*c*]quinazolin]-2-one (3ak)**

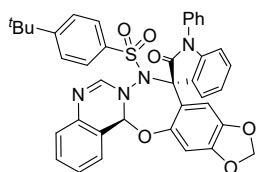

White solid, isolated yield 70% (47 mg);

m.p.: 192.8-193.2 °C;

<sup>1</sup>H NMR (400 MHz, CDCl<sub>3</sub>): δ 8.36 (d, *J* = 7.5 Hz, 1H), 7.83 (d, *J* = 8.6 Hz, 2H), 7.64-7.58 (m, 4H), 7.53-7.46 (m, 4H), 7.42 (t, *J* = 7.5 Hz, 1H), 7.35 (t, *J* = 7.5 Hz, 1H), 7.24-7.22 (m, 1H), 7.14-7.09 (m, 2H), 7.04 (s, 1H), 6.93 (s, 1H), 6.75-6.73 (m, 2H), 5.88-5.87 (m, 2H), 5.84 (d, *J* = 1.4 Hz, 1H), 1.30 (s, 9H);

<sup>13</sup>C NMR (101 MHz, CDCl<sub>3</sub>) δ 174.7, 158.0, 150.2, 148.9, 146.6, 145.5, 142.6, 139.3, 134.4, 131.1, 130.9, 129.9, 129.7, 128.8, 128.6, 128.3, 127.2, 126.6, 126.2, 125.8, 124.3, 123.9, 121.7, 120.4, 110.2, 107.1, 105.9, 102.0, 87.5, 76.0, 35.3, 31.0;

IR (neat): ν 3450, 2930, 2861, 1668, 1606, 1353, 1268, 1174, 1021, 757 cm<sup>-1</sup>;

HRMS (ESI): *m/z* [M + H]<sup>+</sup> calcd. for C<sub>39</sub>H<sub>32</sub>N<sub>4</sub>O<sub>6</sub>S: 685.2115; found: 685.2106;

[α]<sub>D</sub><sup>20</sup> = -150.0 (*c* = 0.1, CH<sub>2</sub>Cl<sub>2</sub>);

The enantiomeric ratio of the product was determined by HPLC (Column Daicel Chiracel IDA; <sup>t</sup>PrOH/Hexane = 50/50; flow rate = 1.0 mL/min; t<sub>R1</sub> = 6.17 min, 4.9%; t<sub>R2</sub> = 11.81 min, 95.1%).

**(3*R*,15*a'**S*)-8'-((4-chlorophenyl)sulfonyl)-1-phenyl-8'*H*,15*a'**H*-spiro[indoline-3,9'-[1,3]dioxolo[4'',5'':4',5']benzo[1',2':6,7][1,3,4]oxadiazepino[3,2-*c*]quinazolin]-2-one (3a1)**

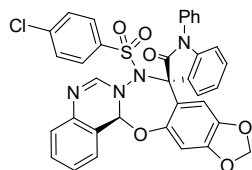

White solid, isolated yield 78% (51 mg);

m.p.: 220.8-221.4 °C;

<sup>1</sup>H NMR (400 MHz, CDCl<sub>3</sub>): δ 8.36 (d, *J* = 7.2 Hz, 1H), 7.78 (d, *J* = 8.6 Hz, 2H), 7.64-7.52 (m, 8H), 7.44 (td, *J* = 7.5, 1.4 Hz, 1H), 7.37 (td, *J* = 7.5, 1.1 Hz, 1H), 7.26-7.23 (m, 1H), 7.15-7.10 (m, 2H), 6.98 (d, *J* = 13.4 Hz, 2H), 6.76-6.73 (m, 2H), 5.90 (s, 1H), 5.88 (d, *J* = 1.2 Hz, 1H), 5.84 (d, *J* = 1.2 Hz, 1H);

<sup>13</sup>C NMR (101 MHz, CDCl<sub>3</sub>) δ 174.7, 149.8, 149.0, 146.5, 145.6, 142.5, 139.1, 136.4, 134.3, 132.5, 131.0, 130.8, 130.2, 130.0, 129.8, 129.5, 128.9, 128.3, 127.1, 126.8, 125.9, 124.2, 124.0, 121.3, 120.2, 110.3, 107.0, 105.9, 102.1, 87.5, 76.2;

IR (neat): ν 3460, 2918, 2867, 1583, 1462, 1225, 1074, 1041, 853, 725 cm<sup>-1</sup>;

HRMS (ESI): *m/z* [M + H]<sup>+</sup> calcd. for C<sub>35</sub>H<sub>23</sub>ClN<sub>4</sub>O<sub>6</sub>S: 663.1100; found: 663.1110;

[α]<sub>D</sub><sup>20</sup> = -158.7 (*c* = 0.1, CH<sub>2</sub>Cl<sub>2</sub>);

The enantiomeric ratio of the product was determined by HPLC (Column Daicel Chiracel IA; <sup>t</sup>PrOH/Hexane = 50/50; flow rate = 1.0 mL/min; t<sub>R1</sub> = 10.49 min, 2.4%; t<sub>R2</sub> = 40.12 min, 97.6%)

**(3*R*,15*a'**S*)-8'-((4-bromophenyl)sulfonyl)-1-phenyl-8'*H*,15*a'**H*-spiro[indoline-3,9'-[1,3]dioxolo[4',5'':4,5']benzo[1',2':6,7][1,3,4]oxadiazepino[3,2-*c*]quinazolin]-2-one (3am)**

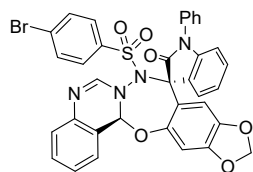

White solid, isolated yield 62% (43 mg);

m.p.: 220.3-220.5 °C;

<sup>1</sup>H NMR (400 MHz, CDCl<sub>3</sub>): δ 8.36 (d, *J* = 7.2 Hz, 1H), 7.86 (d, *J* = 8.7 Hz, 2H), 7.64-7.50 (m, 6H), 7.45-7.40 (m, 3H), 7.37 (td, *J* = 7.4, 1.1 Hz, 1H), 7.27-7.23 (m, 1H), 7.15-7.10 (m, 2H), 6.96 (d, *J* = 5.3 Hz, 2H), 6.75-6.73 (m, 2H), 5.90-5.88 (m, 2H), 5.85 (d, *J* = 1.3 Hz, 1H);

<sup>13</sup>C NMR (101 MHz, CDCl<sub>3</sub>) δ 174.7, 149.8, 149.0, 146.6, 145.6, 142.5, 140.8, 139.1, 135.9, 134.3, 131.0, 130.8, 130.2, 130.0, 129.8, 129.6, 128.9, 128.3, 127.1, 126.8, 126.0, 124.2, 124.0, 121.4, 120.3, 110.3, 107.1, 105.9, 102.1, 87.5, 76.2;

IR (neat): ν 3467, 2928, 2859, 1482, 1371, 1244, 1173, 851, 703, 673 cm<sup>-1</sup>;

HRMS (ESI): *m/z* [M + H]<sup>+</sup> calcd. for C<sub>35</sub>H<sub>23</sub>BrN<sub>4</sub>O<sub>6</sub>S: 707.0594; found: 707.0588;

[α]<sub>D</sub><sup>20</sup> = -179.7 (*c* = 0.1, CH<sub>2</sub>Cl<sub>2</sub>);

The enantiomeric ratio of the product was determined by HPLC (Column Daicel Chiralcel IA; <sup>i</sup>PrOH/Hexane = 50/50; flow rate = 1.0 mL/min; *t*<sub>R1</sub> = 10.38 min, 0.2%; *t*<sub>R2</sub> = 36.44 min, 99.8%).

### 3. Reference

- [1] J. Yan, P. Retailleau, C. Tran, and A. Hamze, Leveraging *in situ* *N*-tosylhydrazones as diazo surrogates for efficient access to pyrazolo-[1,5-*c*]quinazolinone derivatives, *Org. Biomol. Chem.*, 2024, **22**, 5816–5821.
- [2] H. Shi, L. Wang, S.-S., Li, Y. Liu, and L. Xu, Divergent syntheses of spirooxindoles from oxindole-embedded four-membered synthon *via* cycloaddition reactions, *Org. Chem. Front.*, 2020, **7**, 747–755.
- [3] T. Wang, A. Shao, H. Feng, S. Yang, M. Gao, J. Tian, and A. Lei, An efficient [3+2] cycloaddition for the synthesis of substituted pyrazolo[1,5-*c*]quinazolines, *Tetrahedron Lett.*, 2015, **71**, 4473–4477.

#### 4. Crystallographic data of **3am**

Single crystal of **3am** suitable for X-ray analysis was grown in dichloromethane/hexane at room temperature. Crystallographic data have been deposited with the Cambridge Crystallographic Data Centre as supplementary publication nos. CCDC-2390408 (**3am**). Copies of these data can be obtained free of charge from the Cambridge Crystallographic Data Centre via [www.ccdc.cam.ac.uk/data\\_request/cif](http://www.ccdc.cam.ac.uk/data_request/cif).

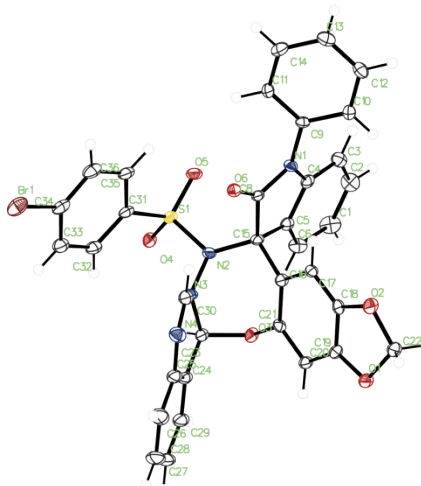

**Figure S1.** ORTEP drawing of **3am** with 30% thermal ellipsoids.

**STable 1.** Crystal data and structure refinement for **3am**.

|                                        |                                                                                                               |
|----------------------------------------|---------------------------------------------------------------------------------------------------------------|
| Identification code                    | exp_4022                                                                                                      |
| Empirical formula                      | C <sub>93.33</sub> H <sub>61.33</sub> Br <sub>2.67</sub> N <sub>10.67</sub> O <sub>16</sub> S <sub>2.67</sub> |
| Formula weight                         | 1886.78                                                                                                       |
| Temperature/K                          | 100.01(10)                                                                                                    |
| Crystal system                         | orthorhombic                                                                                                  |
| Space group                            | C222 <sub>1</sub>                                                                                             |
| a/Å                                    | 11.76370(10)                                                                                                  |
| b/Å                                    | 20.6560(2)                                                                                                    |
| c/Å                                    | 26.7794(3)                                                                                                    |
| $\alpha$ /°                            | 90                                                                                                            |
| $\beta$ /°                             | 90                                                                                                            |
| $\gamma$ /°                            | 90                                                                                                            |
| Volume/Å <sup>3</sup>                  | 6507.15(11)                                                                                                   |
| Z                                      | 3                                                                                                             |
| $\rho_{\text{calc}}$ /cm <sup>3</sup>  | 1.444                                                                                                         |
| $\mu$ /mm <sup>-1</sup>                | 2.760                                                                                                         |
| F(000)                                 | 2880.0                                                                                                        |
| Crystal size/mm <sup>3</sup>           | 0.2 × 0.2 × 0.05                                                                                              |
| Radiation                              | Cu K $\alpha$ ( $\lambda$ = 1.54184)                                                                          |
| 2 $\theta$ range for data collection/° | 6.602 to 144.09                                                                                               |



|                                             |                                                               |
|---------------------------------------------|---------------------------------------------------------------|
| Index ranges                                | -14 ≤ h ≤ 14, -25 ≤ k ≤ 25, -31 ≤ l ≤ 33                      |
| Reflections collected                       | 45604                                                         |
| Independent reflections                     | 6390 [R <sub>int</sub> = 0.0657, R <sub>sigma</sub> = 0.0334] |
| Data/restraints/parameters                  | 6390/0/189                                                    |
| Goodness-of-fit on F <sup>2</sup>           | 2.666                                                         |
| Final R indexes [I ≥ 2σ (I)]                | R <sub>1</sub> = 0.0970, wR <sub>2</sub> = 0.2542             |
| Final R indexes [all data]                  | R <sub>1</sub> = 0.0985, wR <sub>2</sub> = 0.2560             |
| Largest diff. peak/hole / e Å <sup>-3</sup> | 2.72/-2.85                                                    |

## 5. Copies of NMR spectra and HPLC chromatograms

$^1\text{H}$  NMR Spectrum of Compound **3aa** (400 MHz,  $\text{CDCl}_3$ )

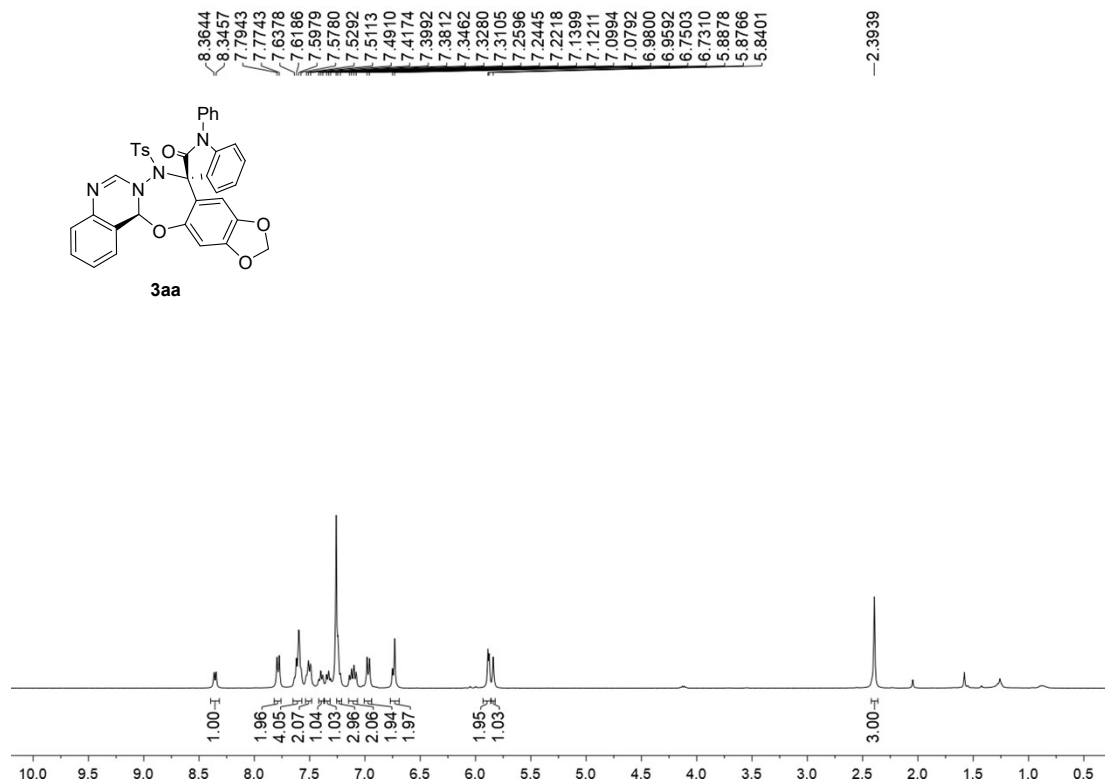

$^{13}\text{C}\{^1\text{H}\}$  NMR Spectrum of Compound **3aa** (101 MHz,  $\text{CDCl}_3$ )

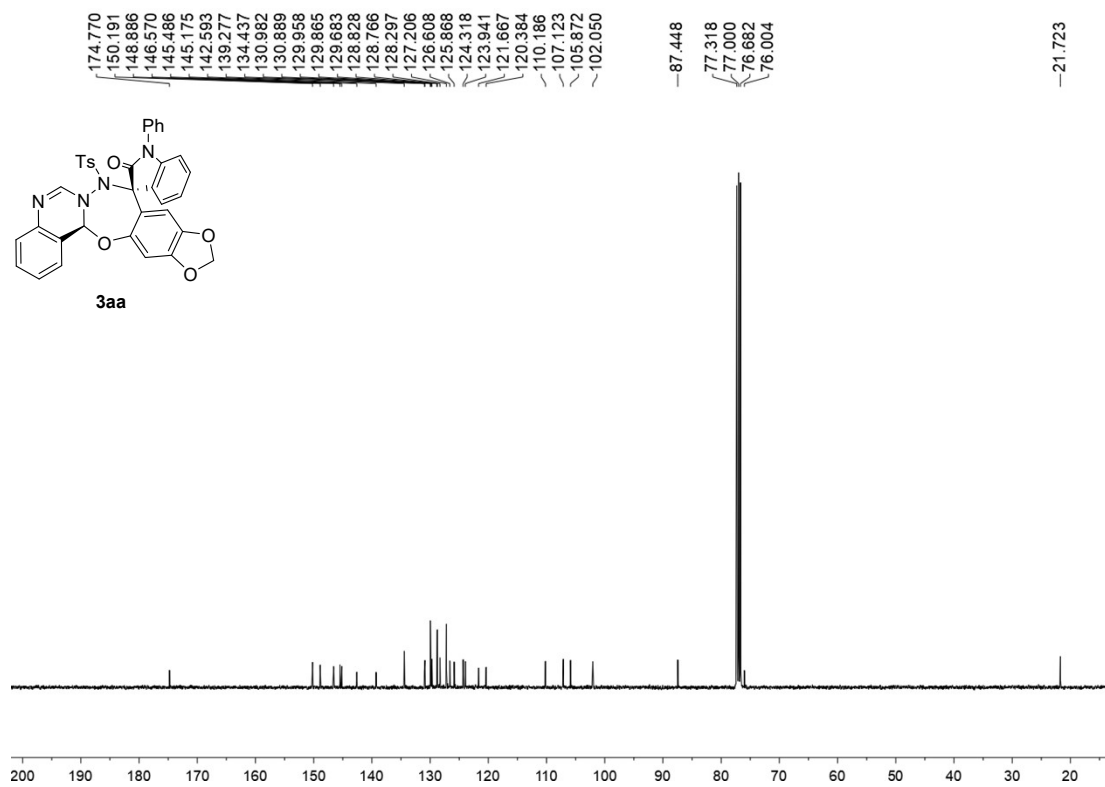

### HPLC Spectra of Compound **3aa**

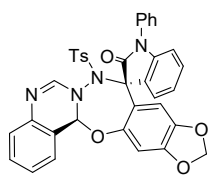

**3aa**

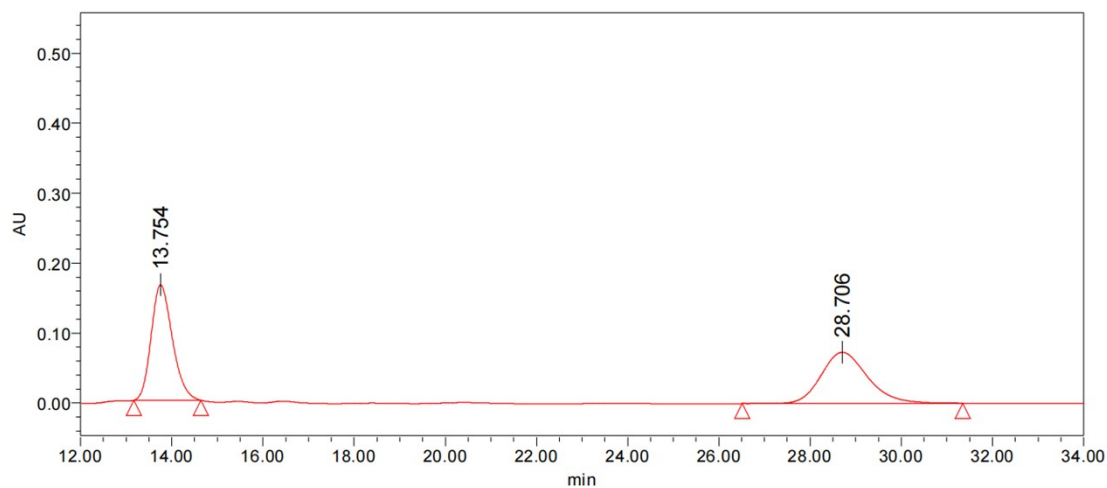

|   | RetTime [min] | Area [mAU*s] | Area% |
|---|---------------|--------------|-------|
| 1 | 13.754        | 5330454      | 50.75 |
| 2 | 28.706        | 5173736      | 49.25 |

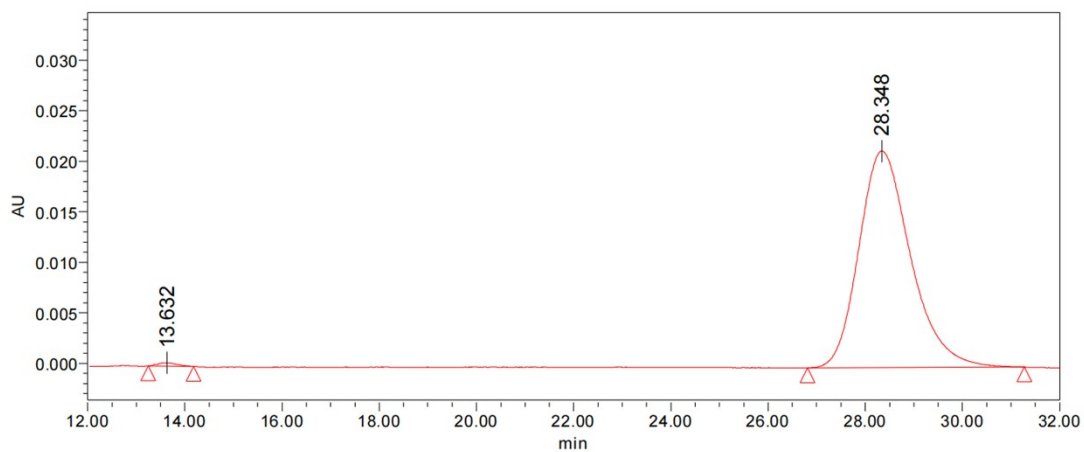

|   | RetTime [min] | Area [mAU*s] | Area% |
|---|---------------|--------------|-------|
| 1 | 13.632        | 9146         | 0.57  |
| 2 | 28.348        | 1585083      | 99.43 |

<sup>1</sup>H NMR Spectrum of Compound **3ba** (400 MHz, CDCl<sub>3</sub>)

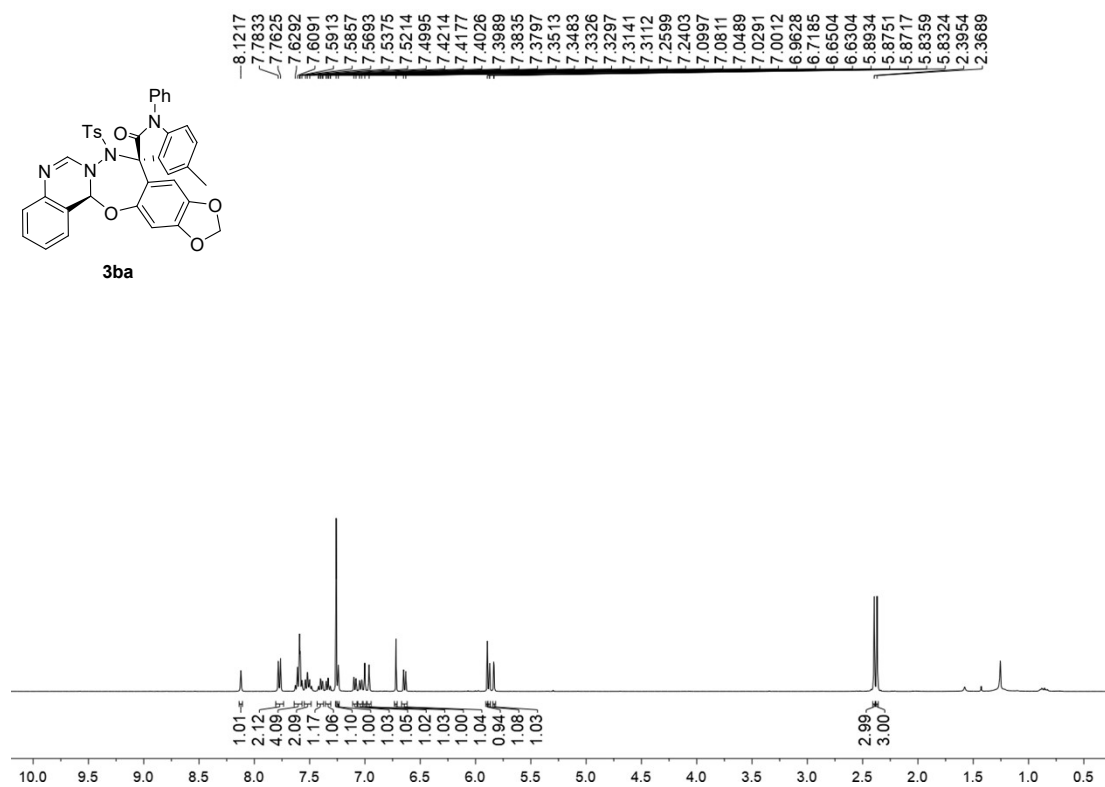

<sup>13</sup>C{<sup>1</sup>H} NMR Spectrum of Compound **3ba** (101 MHz, CDCl<sub>3</sub>)

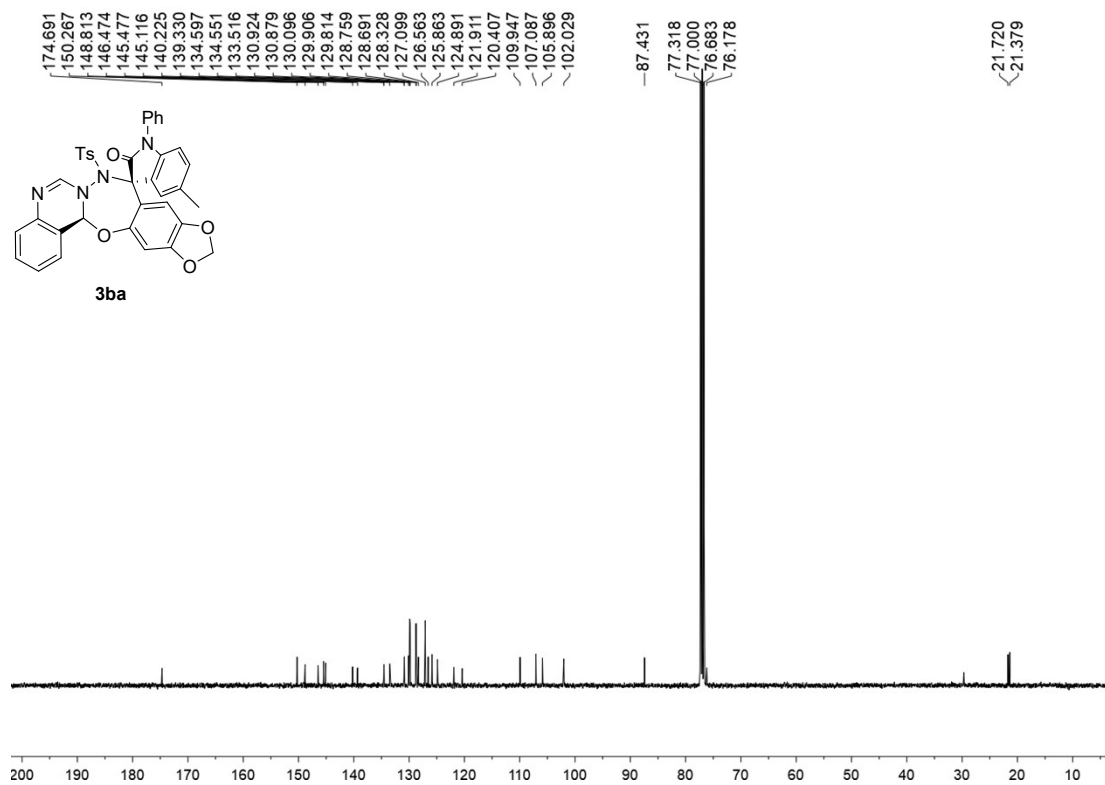

### HPLC Spectra of Compound **3ba**

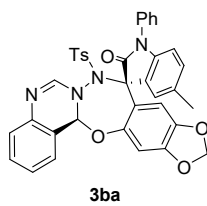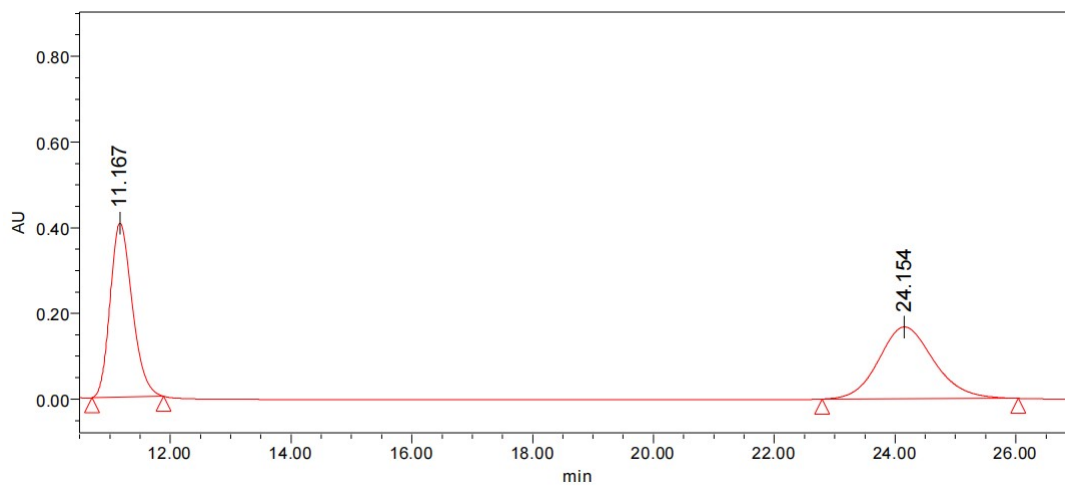

|   | RetTime [min] | Area [mAU*s] | Area% |
|---|---------------|--------------|-------|
| 1 | 11.167        | 10338491     | 49.23 |
| 2 | 24.154        | 10663374     | 50.77 |

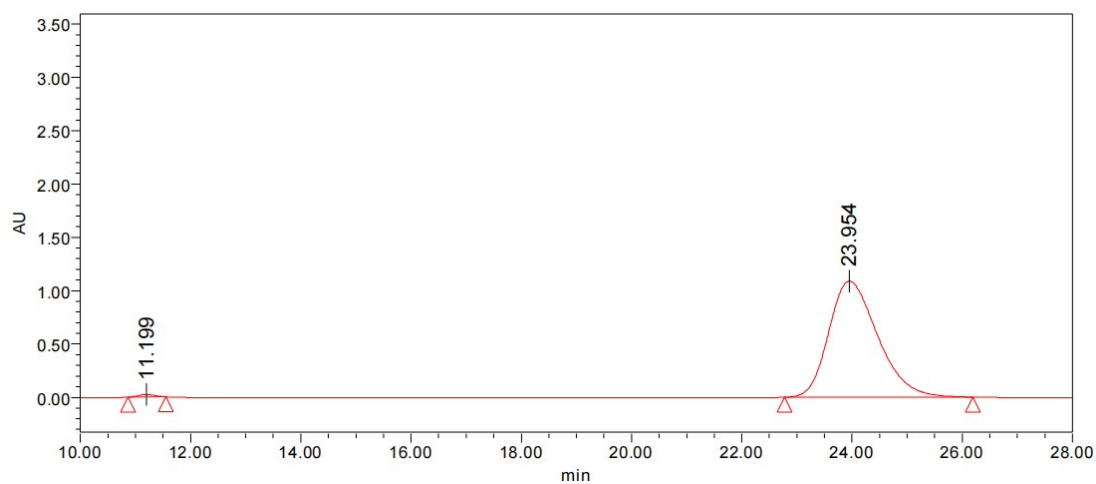

|   | RetTime [min] | Area [mAU*s] | Area% |
|---|---------------|--------------|-------|
| 1 | 11.199        | 476638       | 0.71  |
| 2 | 23.954        | 67032968     | 99.29 |

<sup>1</sup>H NMR Spectrum of Compound **3ca** (400 MHz, CDCl<sub>3</sub>)

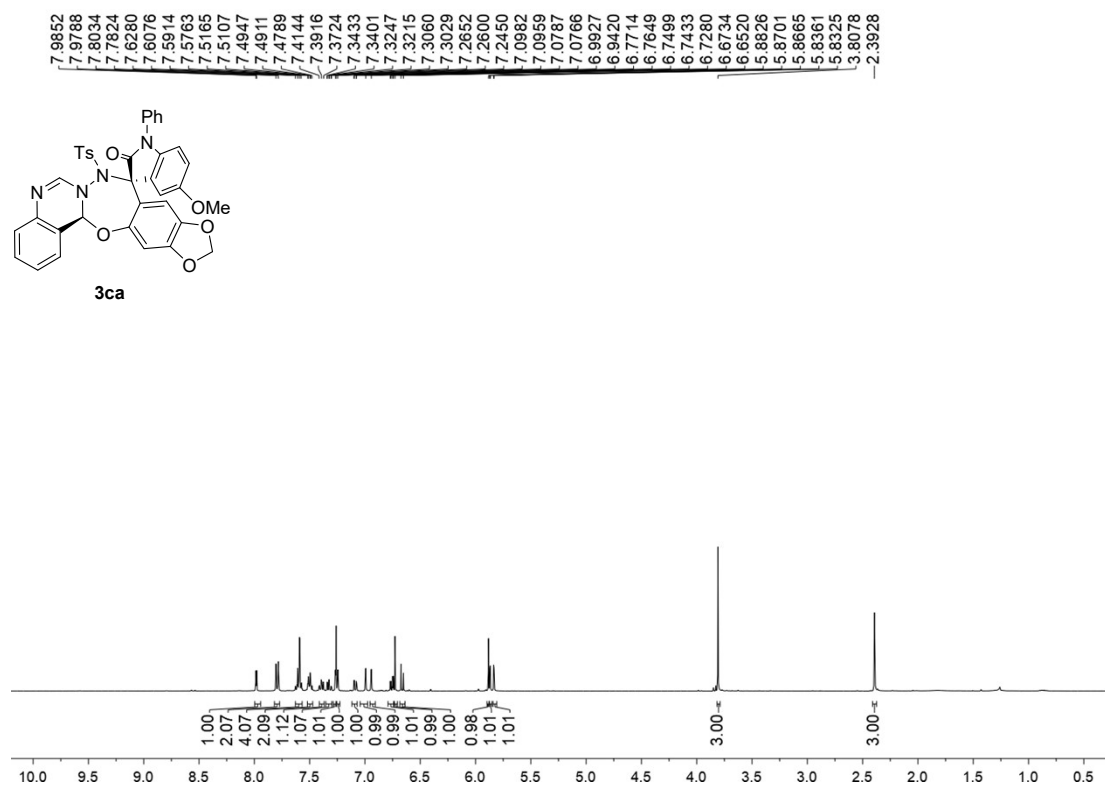

<sup>13</sup>C{<sup>1</sup>H} NMR Spectrum of Compound **3ca** (101 MHz, CDCl<sub>3</sub>)

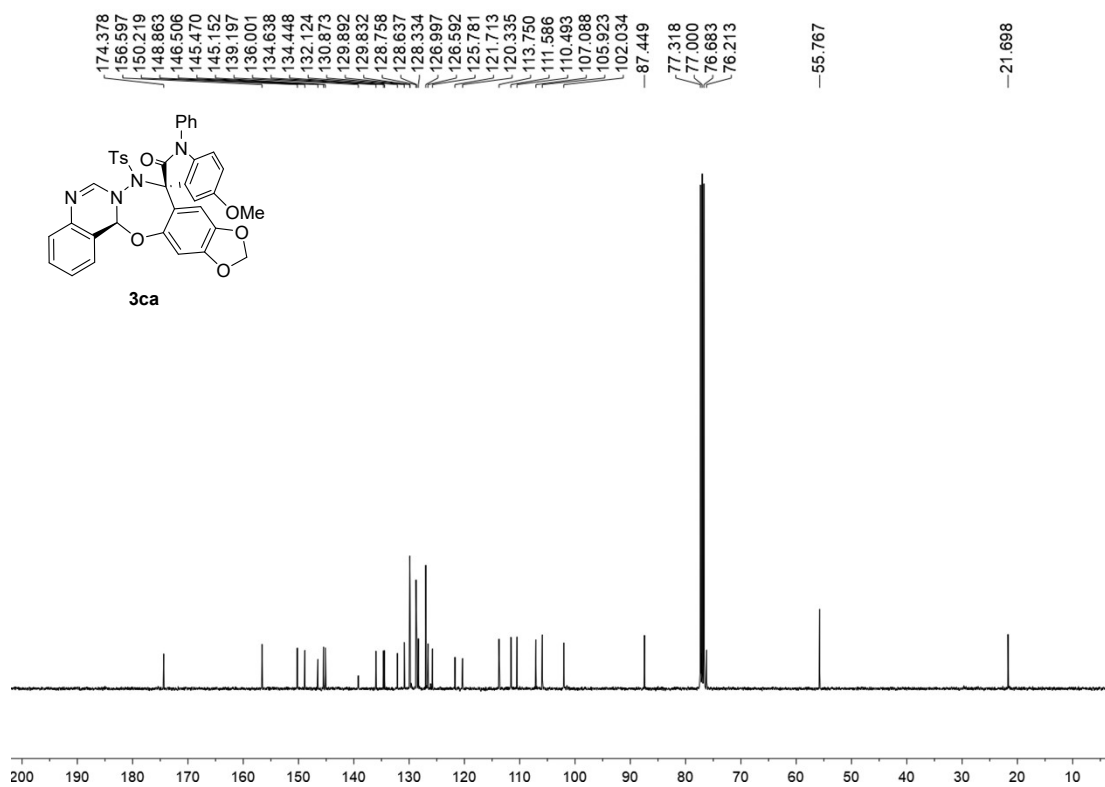

### HPLC Spectra of Compound **3ca**

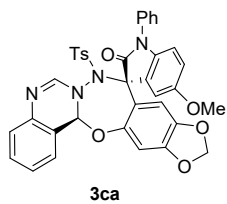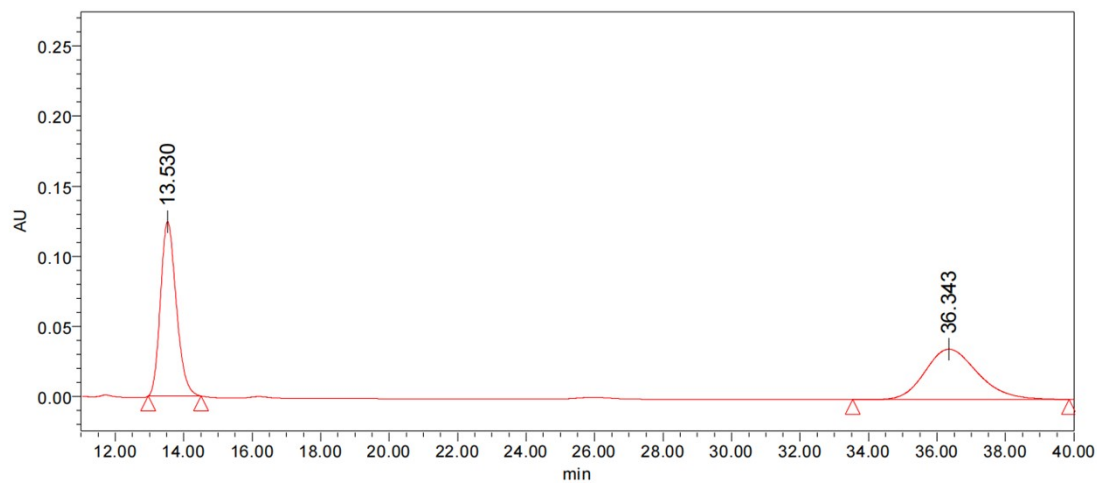

|   | RetTime [min] | Area [mAU*s] | Area% |
|---|---------------|--------------|-------|
| 1 | 13.530        | 3980312      | 50.97 |
| 2 | 36.343        | 3829580      | 49.03 |

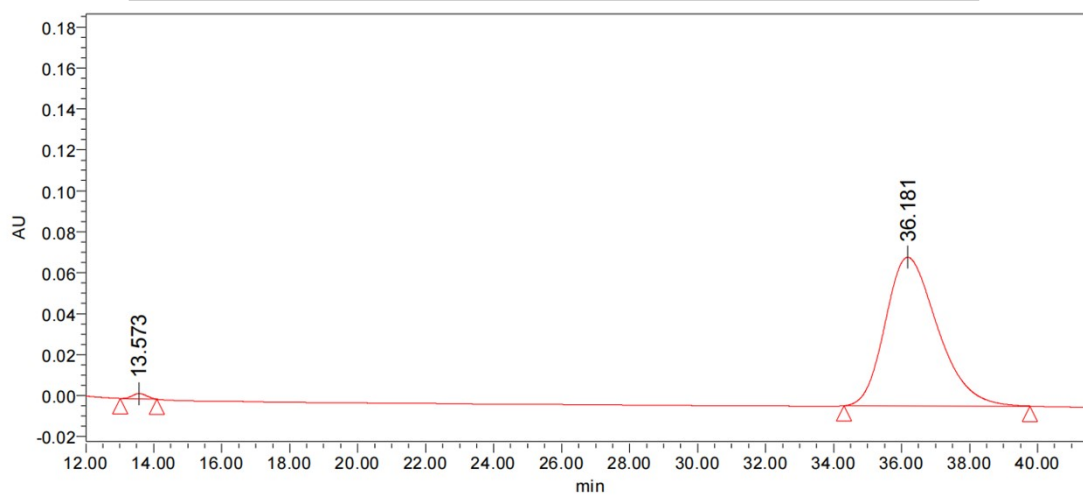

|   | RetTime [min] | Area [mAU*s] | Area% |
|---|---------------|--------------|-------|
| 1 | 13.573        | 75701        | 0.97  |
| 2 | 36.181        | 7748033      | 99.03 |

<sup>1</sup>H NMR Spectrum of Compound **3da** (400 MHz, CDCl<sub>3</sub>)

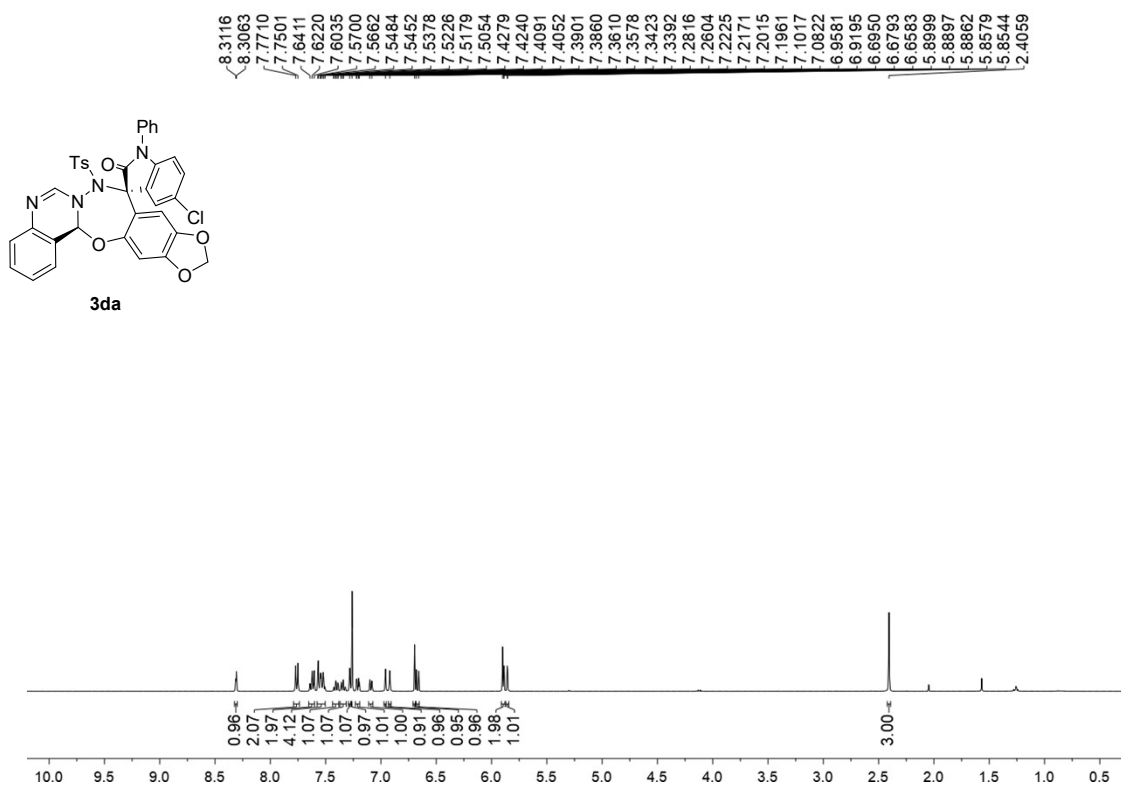

<sup>13</sup>C{<sup>1</sup>H} NMR Spectrum of Compound **3da** (101 MHz, CDCl<sub>3</sub>)

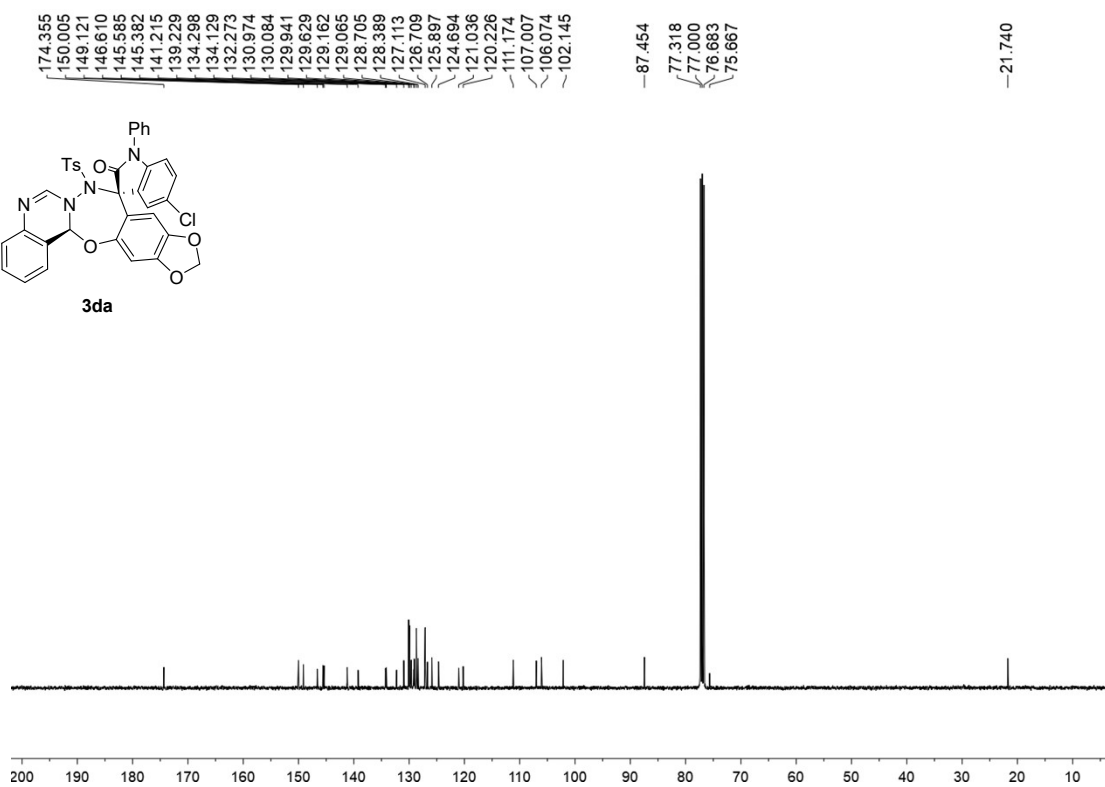



### HPLC Spectra of Compound 3da

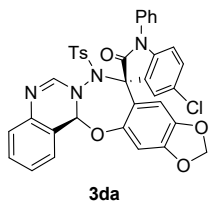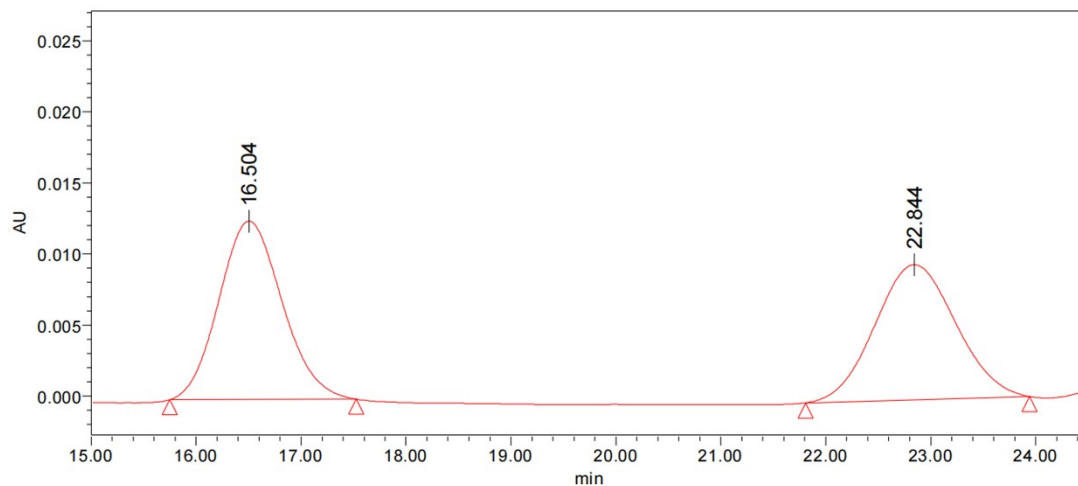

|   | RetTime [min] | Area [mAU*s] | Area% |
|---|---------------|--------------|-------|
| 1 | 16.504        | 525187       | 50.82 |
| 2 | 22.844        | 508286       | 49.18 |

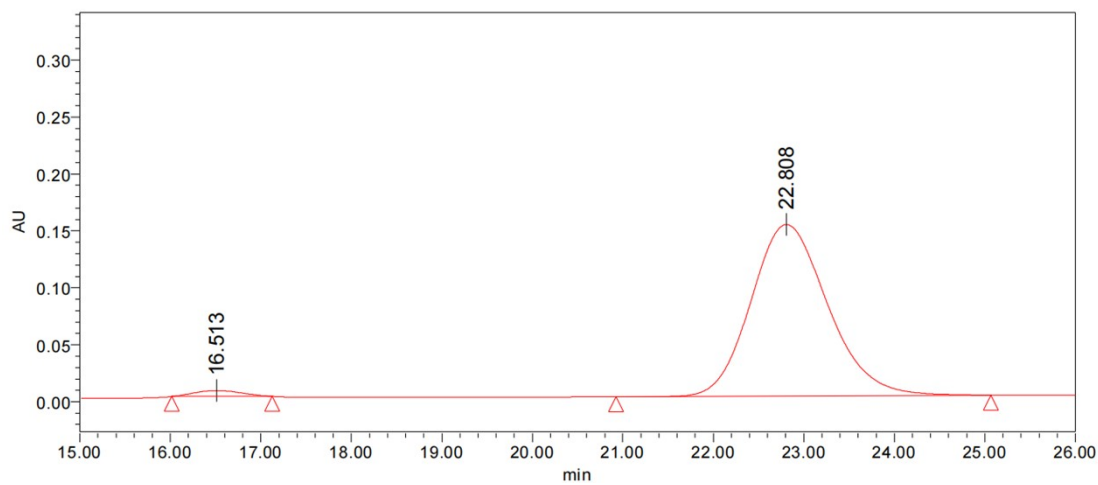

|   | RetTime [min] | Area [mAU*s] | Area% |
|---|---------------|--------------|-------|
| 1 | 16.513        | 187639       | 2.07  |
| 2 | 22.808        | 8885639      | 97.93 |

<sup>1</sup>H NMR Spectrum of Compound **3ea** (400 MHz, CDCl<sub>3</sub>)

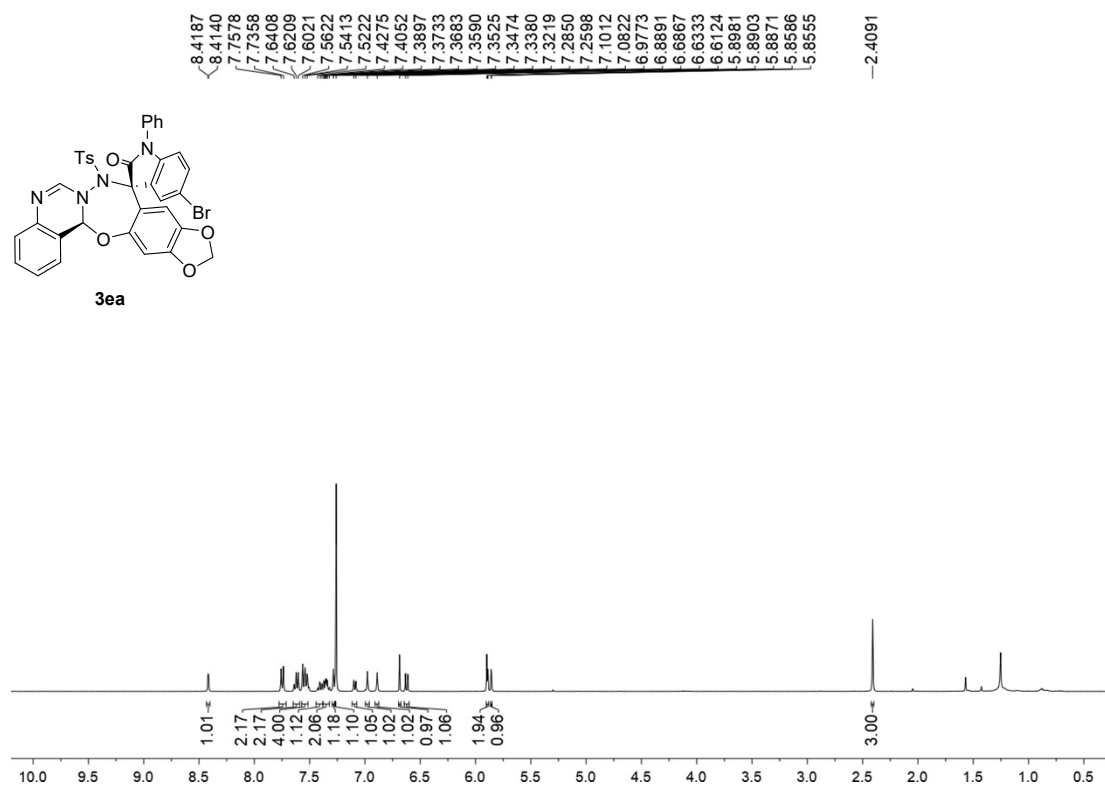

<sup>13</sup>C{<sup>1</sup>H} NMR Spectrum of Compound **3ea** (101 MHz, CDCl<sub>3</sub>)

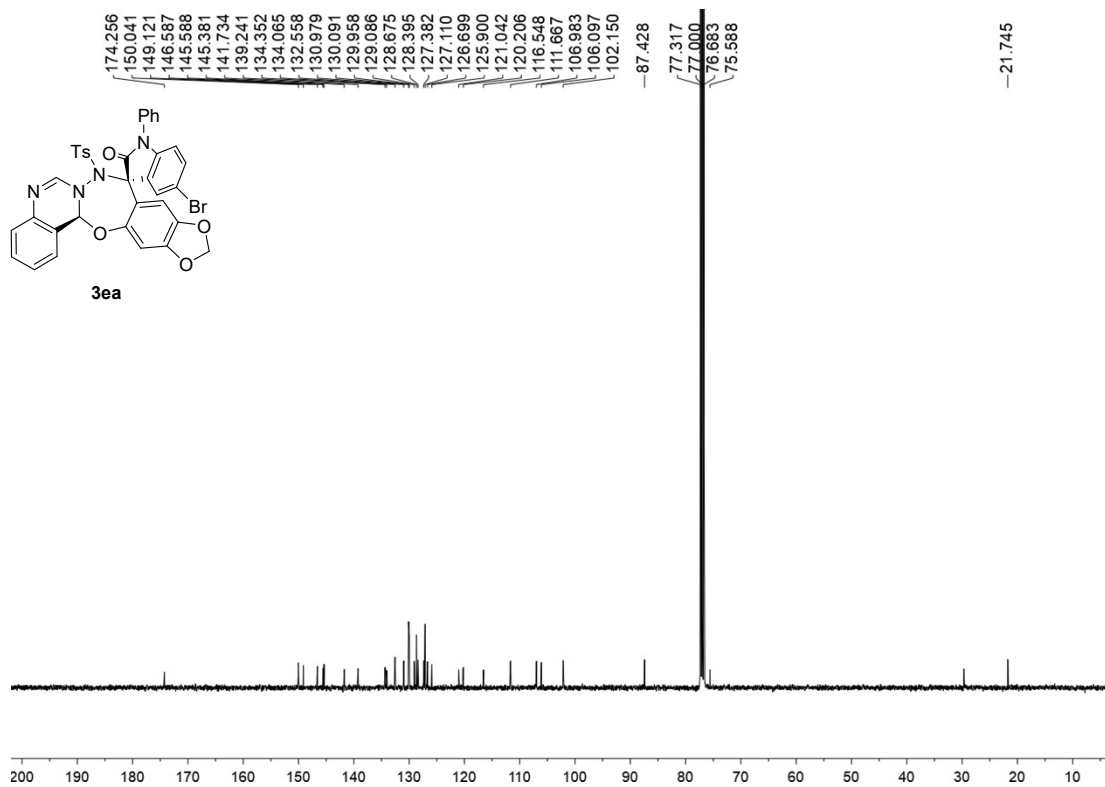

### HPLC Spectra of Compound **3ea**

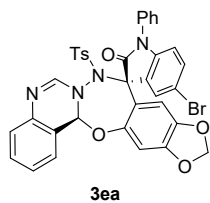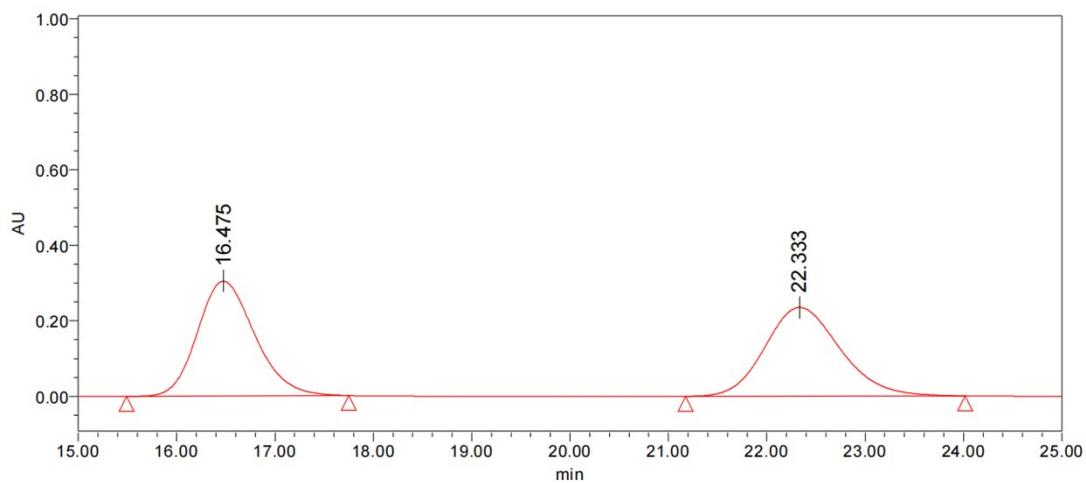

|   | RetTime [min] | Area [mAU*s] | Area% |
|---|---------------|--------------|-------|
| 1 | 16.475        | 12335663     | 49.71 |
| 2 | 22.333        | 12481146     | 50.29 |

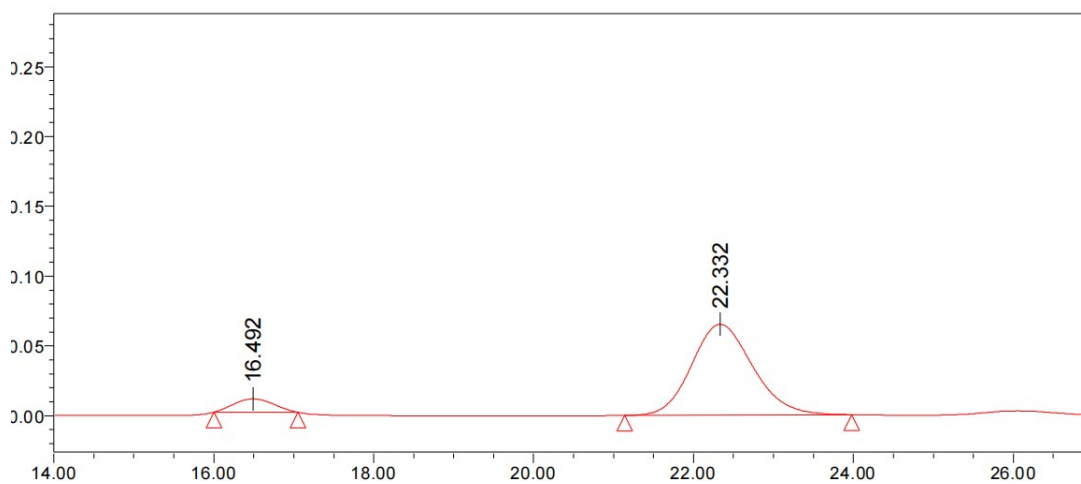

|   | RetTime [min] | Area [mAU*s] | Area% |
|---|---------------|--------------|-------|
| 1 | 16.492        | 329055       | 8.68  |
| 2 | 22.332        | 3460611      | 91.32 |

<sup>1</sup>H NMR Spectrum of Compound **3fa** (400 MHz, CDCl<sub>3</sub>)

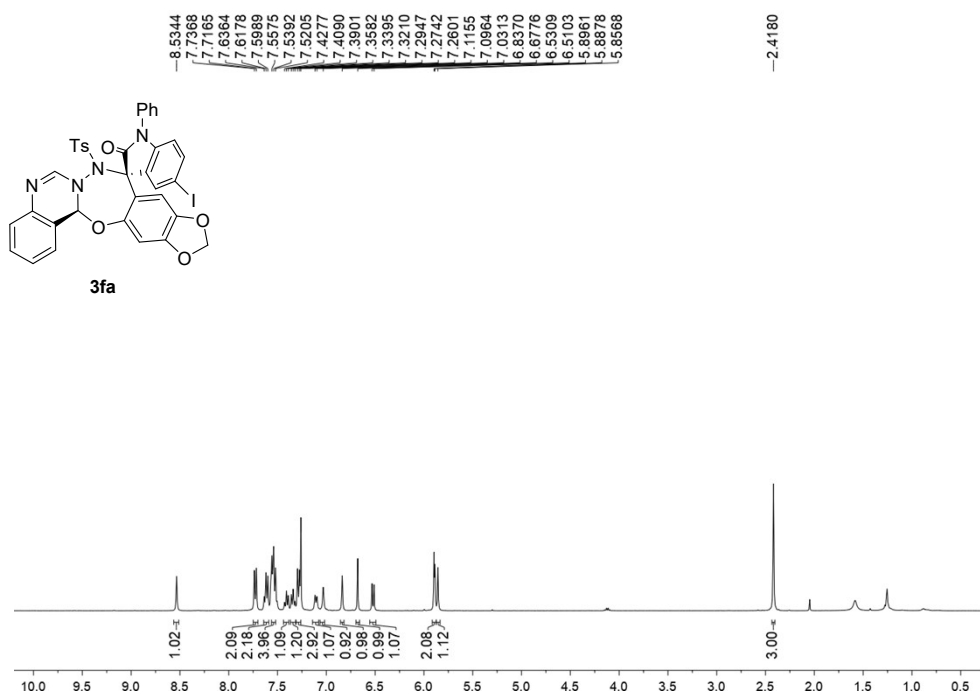

<sup>13</sup>C{<sup>1</sup>H} NMR Spectrum of Compound **3fa** (101 MHz, CDCl<sub>3</sub>)

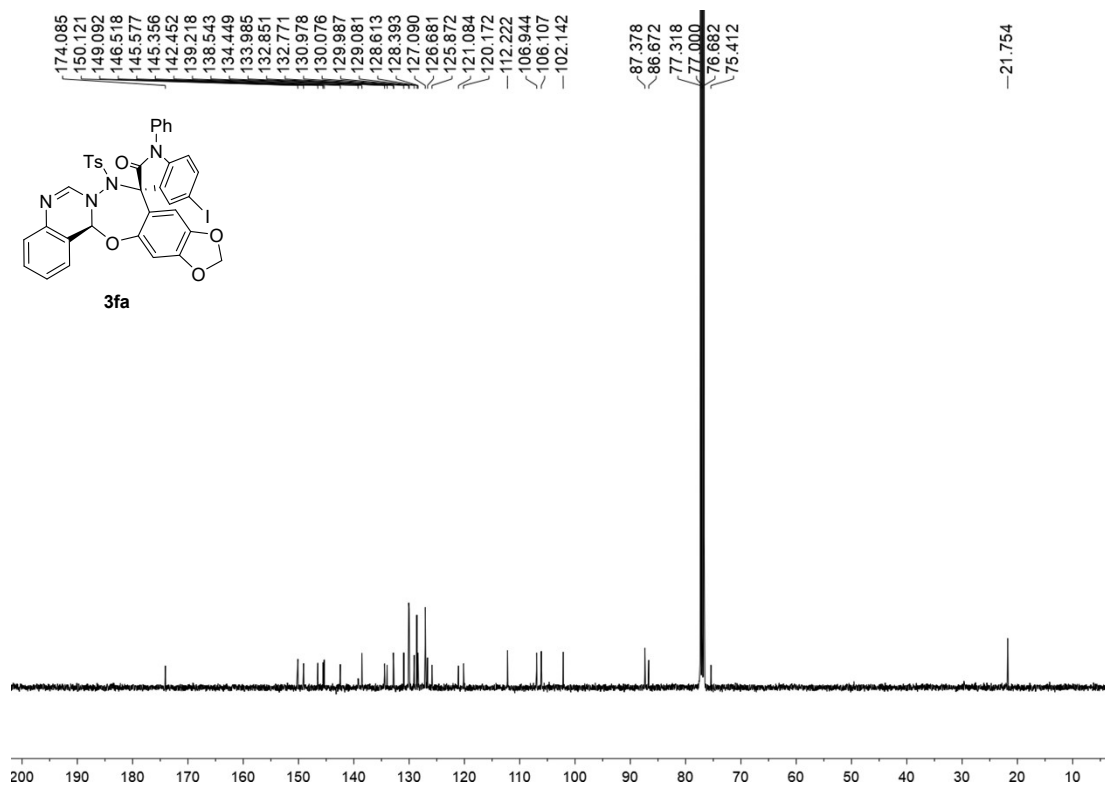

### HPLC Spectra of Compound **3fa**

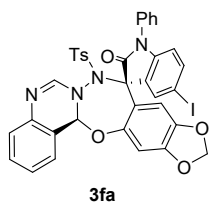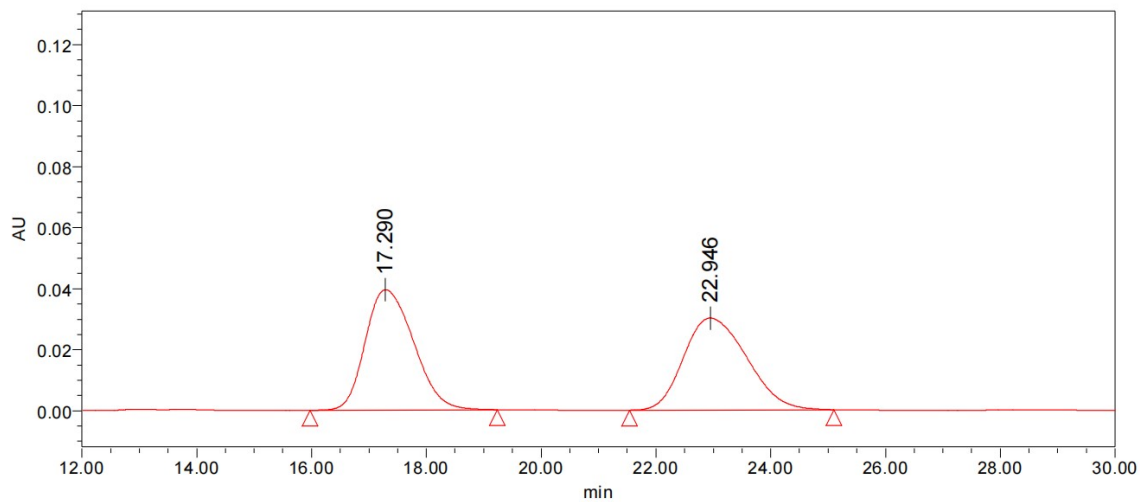

|   | RetTime [min] | Area [mAU*s] | Area% |
|---|---------------|--------------|-------|
| 1 | 17.290        | 2834394      | 49.86 |
| 2 | 22.948        | 2850633      | 50.14 |

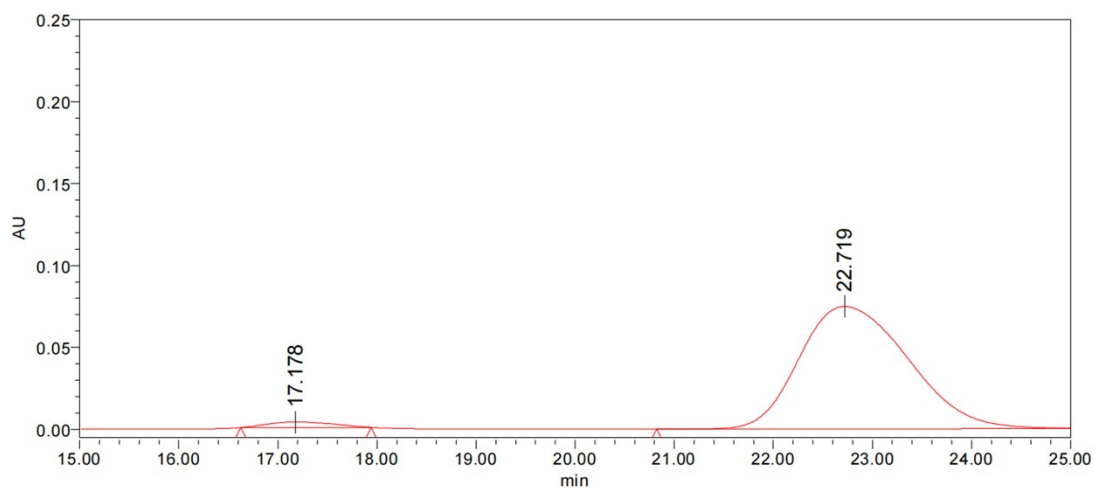

|   | RetTime [min] | Area [mAU*s] | Area% |
|---|---------------|--------------|-------|
| 1 | 17.178        | 152033       | 2.58  |
| 2 | 22.719        | 5735065      | 97.42 |

<sup>1</sup>H NMR Spectrum of Compound **3ga** (400 MHz, CDCl<sub>3</sub>)

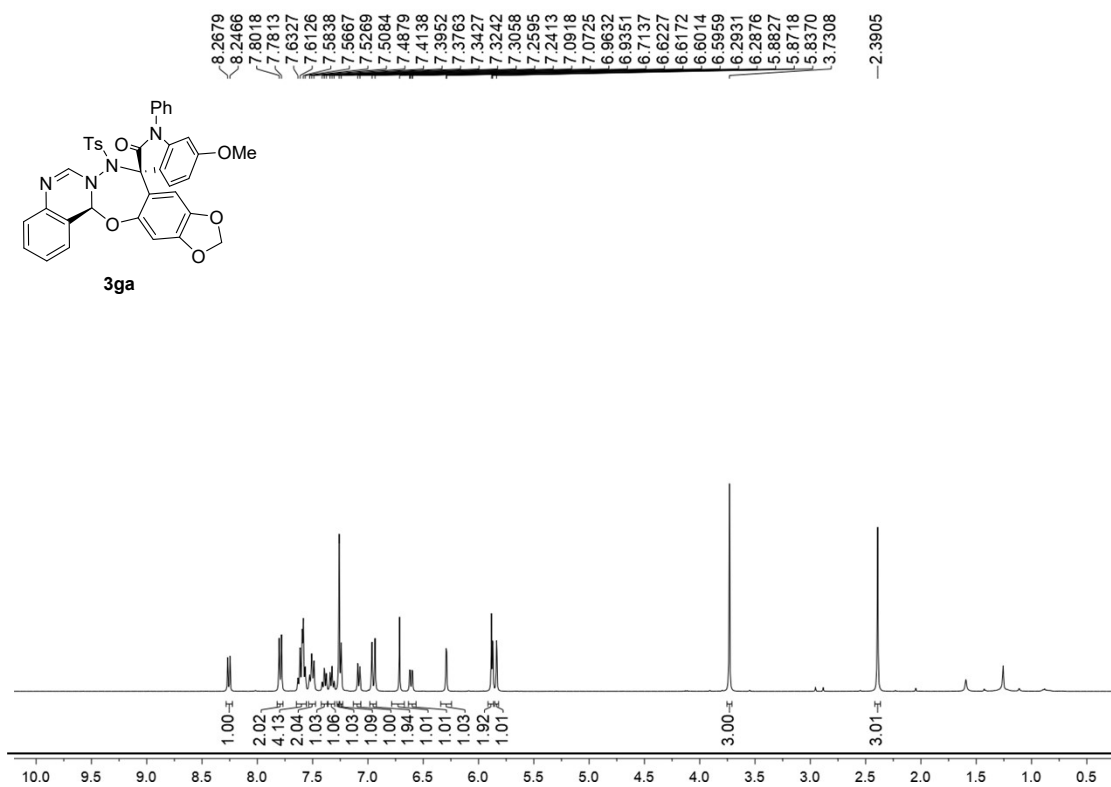

<sup>13</sup>C{<sup>1</sup>H} NMR Spectrum of Compound **3ga** (101 MHz, CDCl<sub>3</sub>)

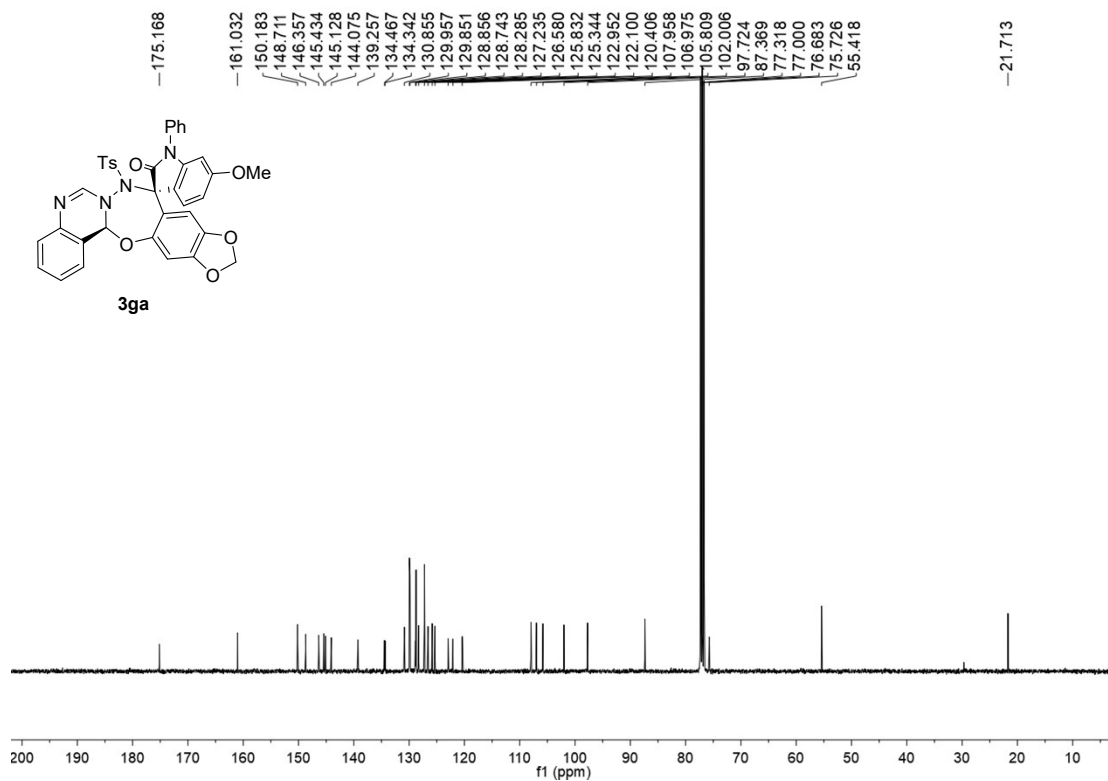

### HPLC Spectra of Compound **3ga**

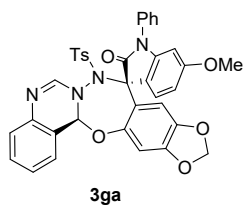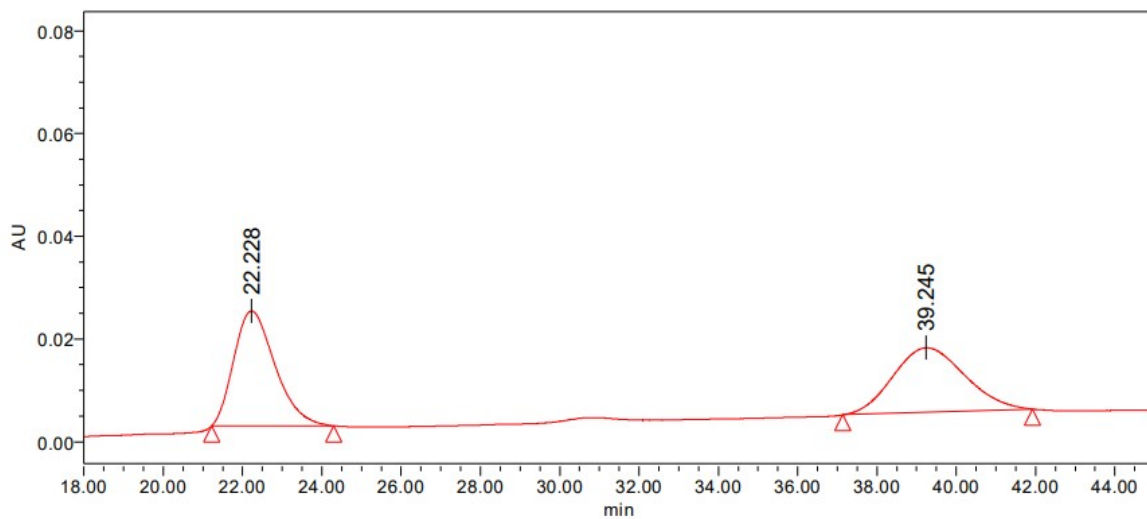

|   | RetTime [min] | Area [mAU*s] | Area% |
|---|---------------|--------------|-------|
| 1 | 22.228        | 1612989      | 50.54 |
| 2 | 39.245        | 1578614      | 49.46 |

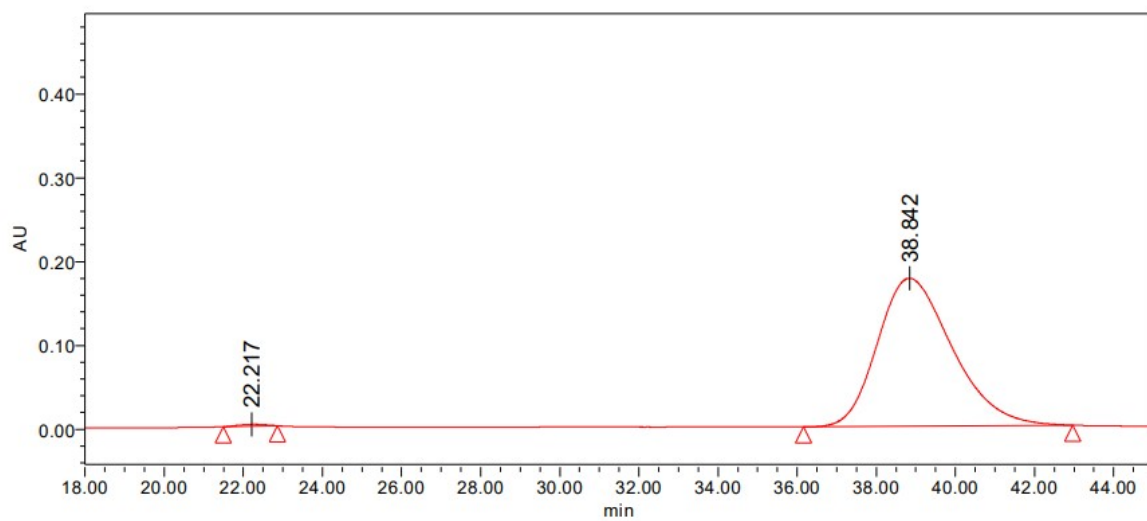

|   | RetTime [min] | Area [mAU*s] | Area% |
|---|---------------|--------------|-------|
| 1 | 22.217        | 106066       | 0.46  |
| 2 | 38.842        | 23146767     | 99.54 |

<sup>1</sup>H NMR Spectrum of Compound **3ha** (400 MHz, CDCl<sub>3</sub>)

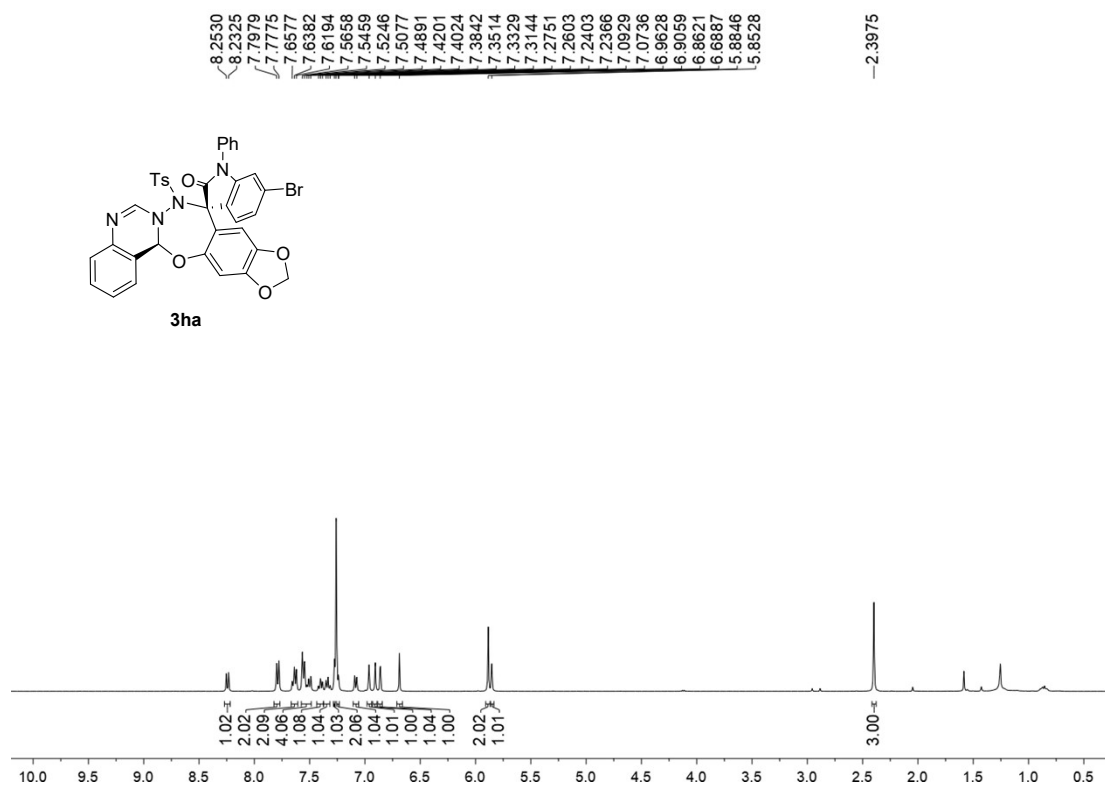

<sup>13</sup>C{<sup>1</sup>H} NMR Spectrum of Compound **3ha** (101 MHz, CDCl<sub>3</sub>)

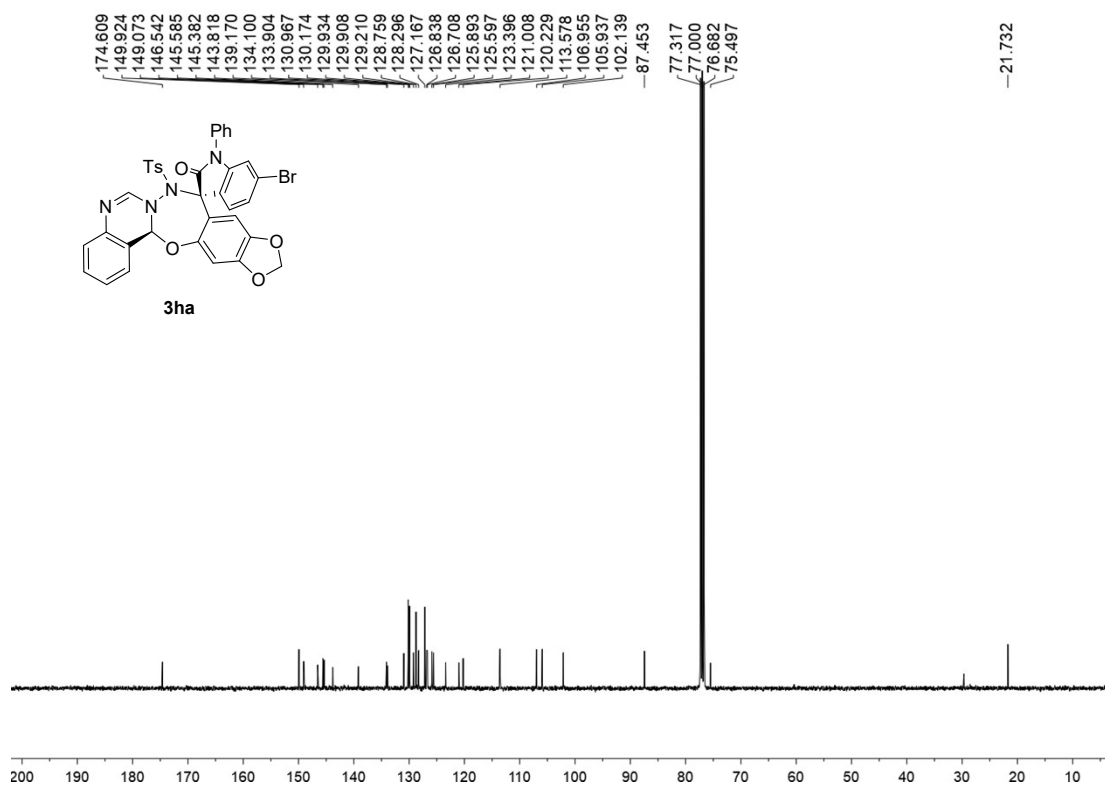



### HPLC Spectra of Compound **3ha**

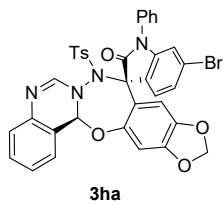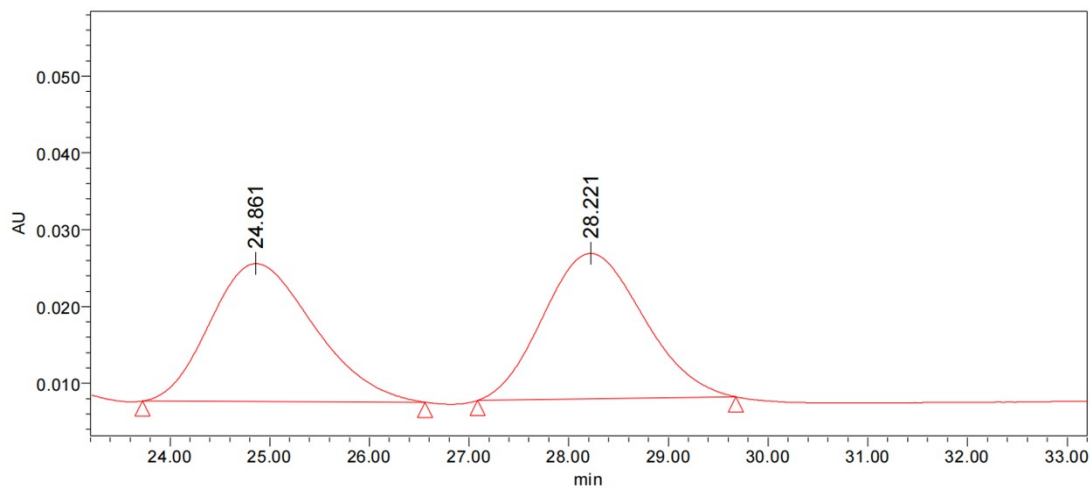

|   | RetTime [min] | Area [mAU*s] | Area% |
|---|---------------|--------------|-------|
| 1 | 24.861        | 1302098      | 49.65 |
| 2 | 28.221        | 1320507      | 50.35 |

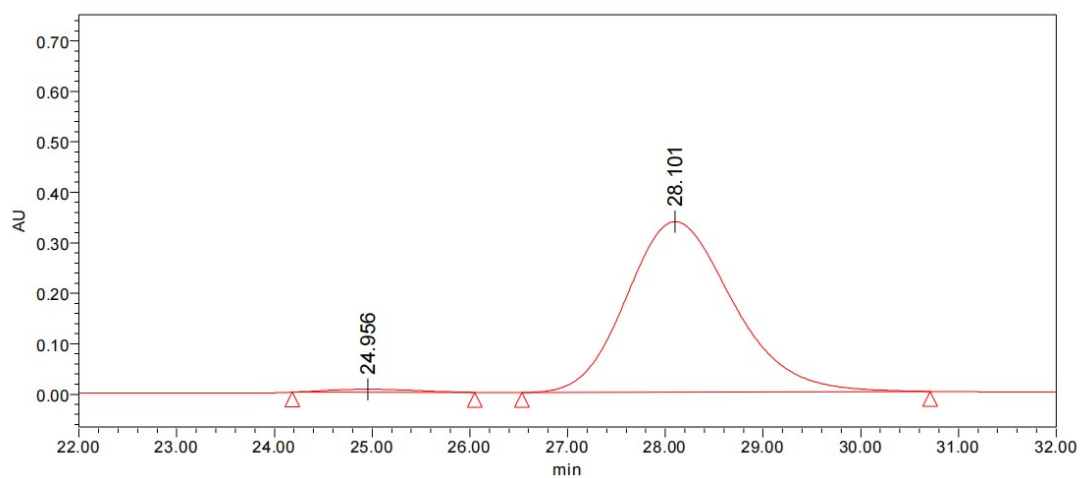

|   | RetTime [min] | Area [mAU*s] | Area% |
|---|---------------|--------------|-------|
| 1 | 24.956        | 373380       | 1.44  |
| 2 | 28.101        | 25537449     | 98.56 |

<sup>1</sup>H NMR Spectrum of Compound **3ia** (400 MHz, CDCl<sub>3</sub>)

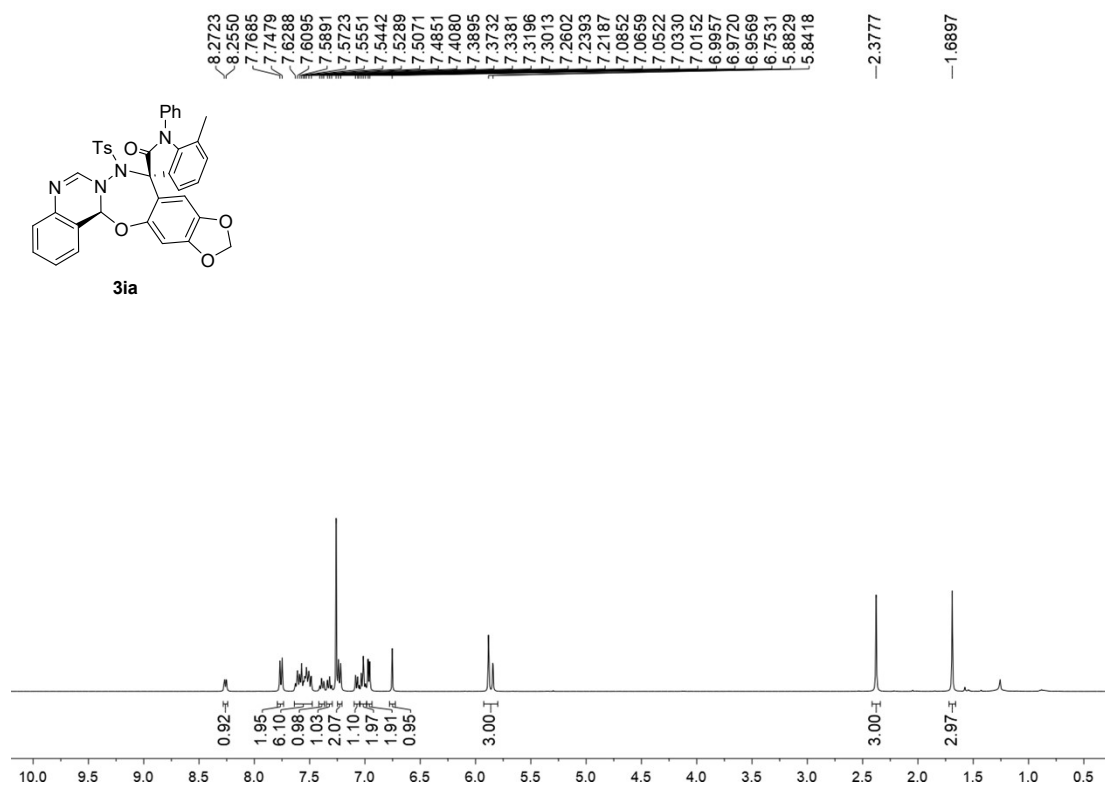

<sup>13</sup>C{<sup>1</sup>H} NMR Spectrum of Compound **3ia** (101 MHz, CDCl<sub>3</sub>)

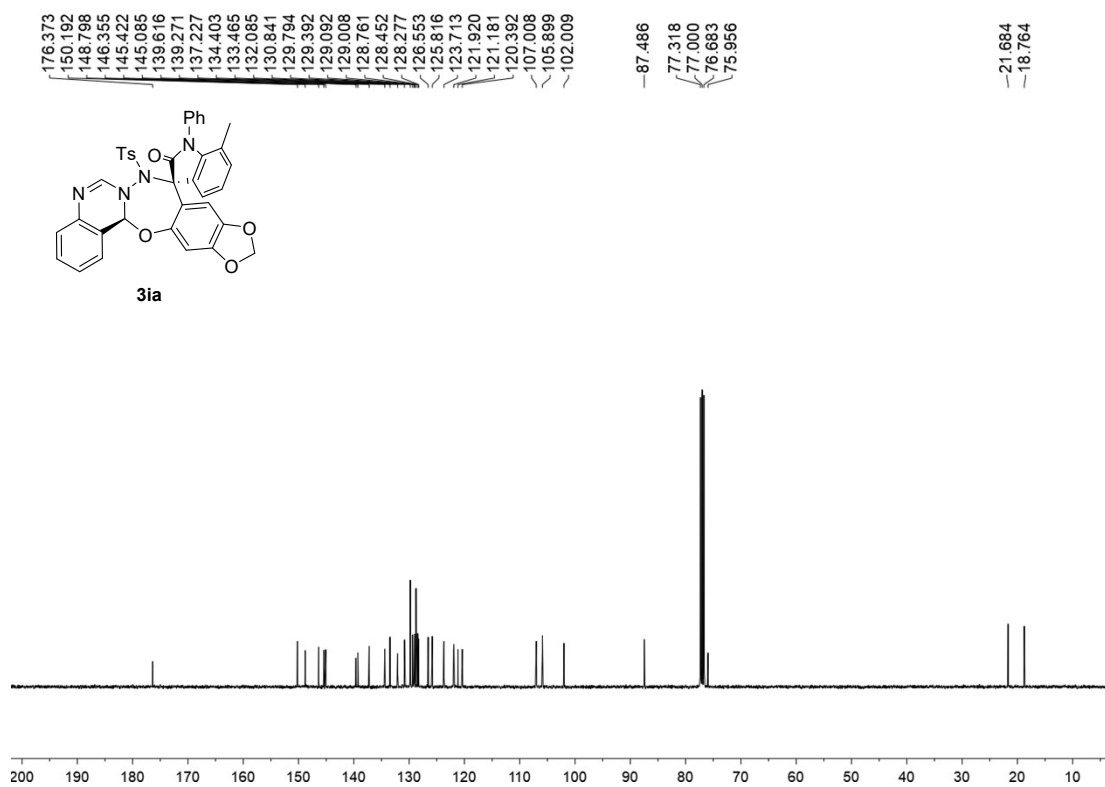

### HPLC Spectra of Compound **3ia**

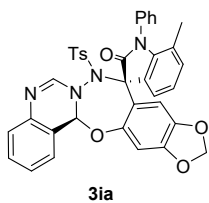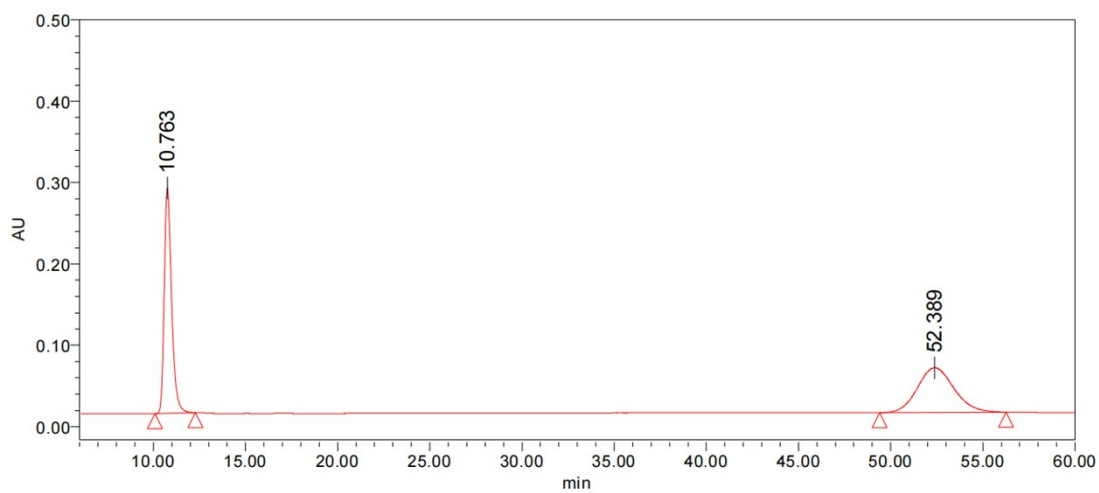

|   | RetTime [min] | Area [mAU*s] | Area% |
|---|---------------|--------------|-------|
| 1 | 10.763        | 7669336      | 50.34 |
| 2 | 52.389        | 7565453      | 49.66 |

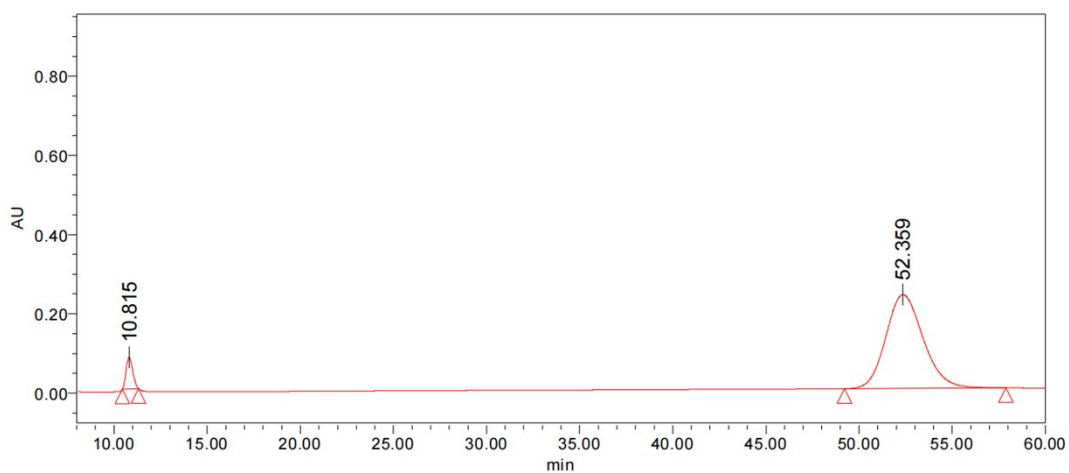

|   | RetTime [min] | Area [mAU*s] | Area% |
|---|---------------|--------------|-------|
| 1 | 10.815        | 1963878      | 5.60  |
| 2 | 52.359        | 33083179     | 94.40 |

<sup>1</sup>H NMR Spectrum of Compound **3ja** (400 MHz, CDCl<sub>3</sub>)

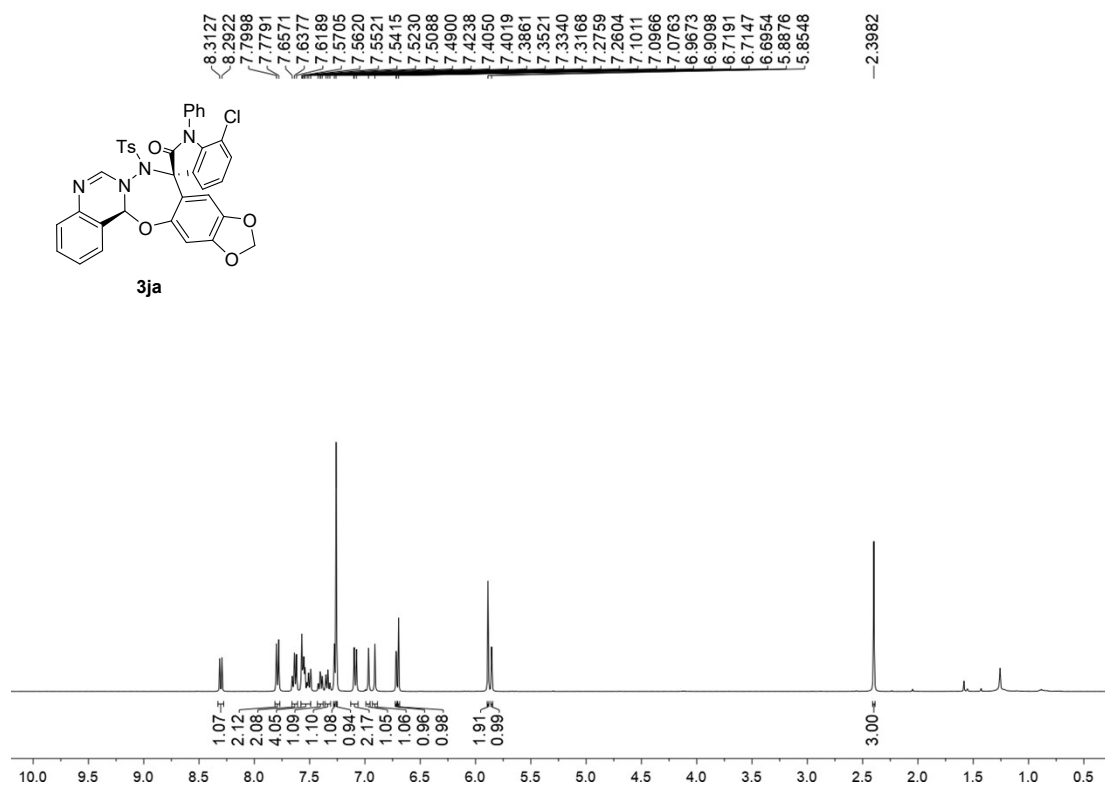

<sup>13</sup>C{<sup>1</sup>H} NMR Spectrum of Compound **3ja** (101 MHz, CDCl<sub>3</sub>)

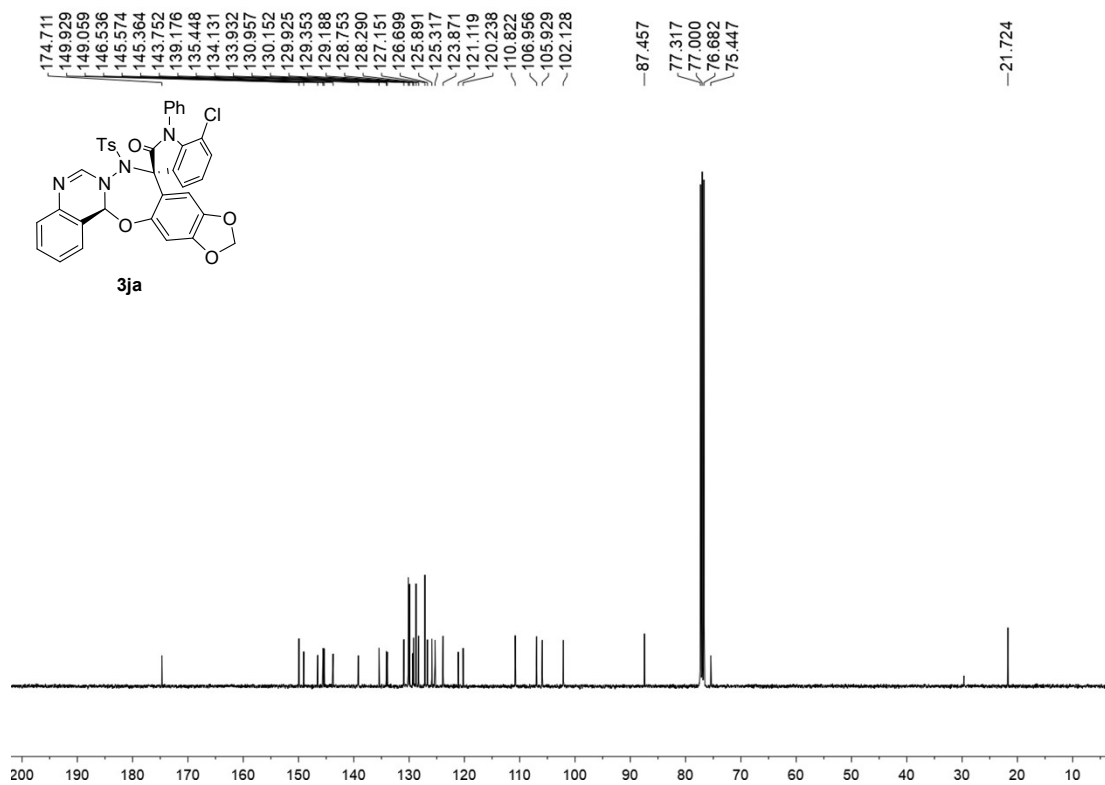

### HPLC Spectra of Compound **3ja**

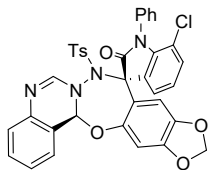

**3ja**

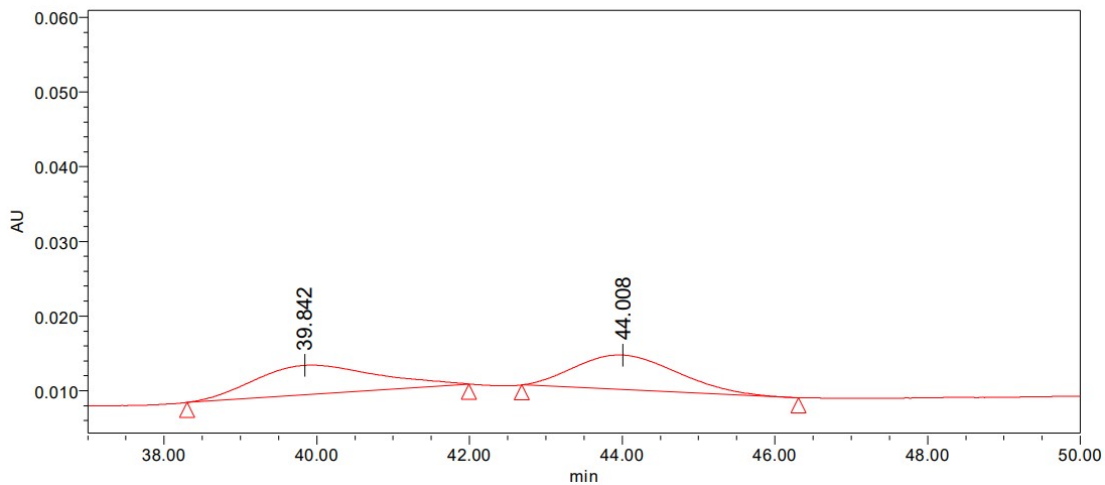

|   | RetTime [min] | Area [mAU*s] | Area% |
|---|---------------|--------------|-------|
| 1 | 39.842        | 432310       | 49.96 |
| 2 | 44.008        | 433059       | 50.04 |

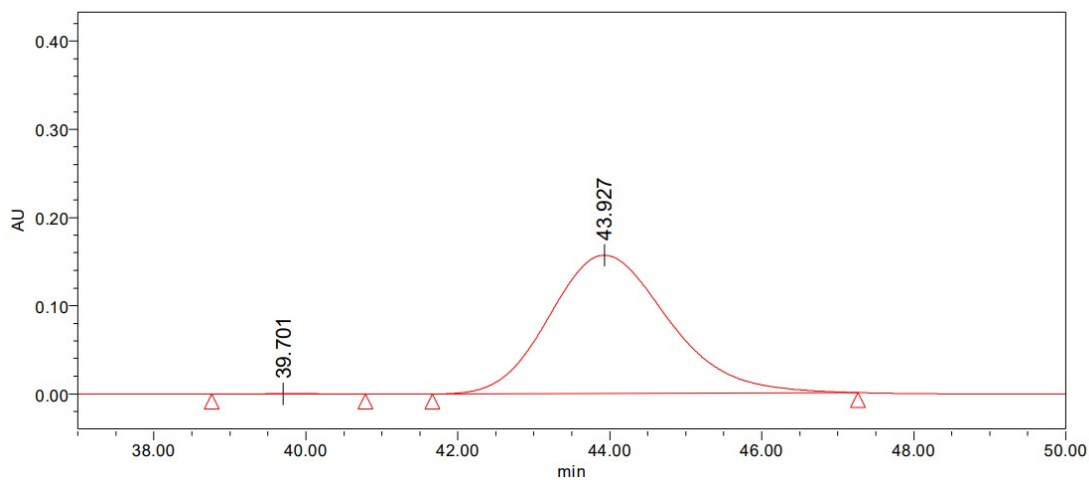

|   | RetTime [min] | Area [mAU*s] | Area% |
|---|---------------|--------------|-------|
| 1 | 39.701        | 32583        | 0.19  |
| 2 | 43.927        | 17138754     | 99.81 |

<sup>1</sup>H NMR Spectrum of Compound **3ka** (400 MHz, CDCl<sub>3</sub>)

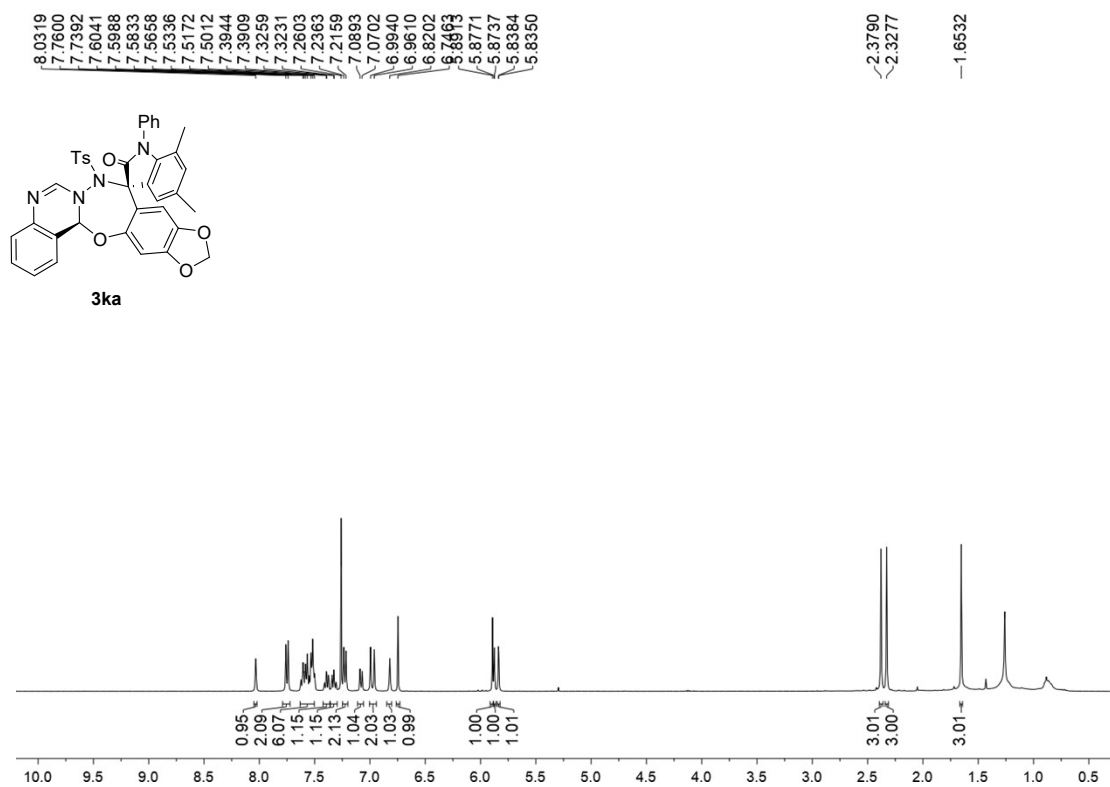

<sup>13</sup>C{<sup>1</sup>H} NMR Spectrum of Compound **3ka** (101 MHz, CDCl<sub>3</sub>)

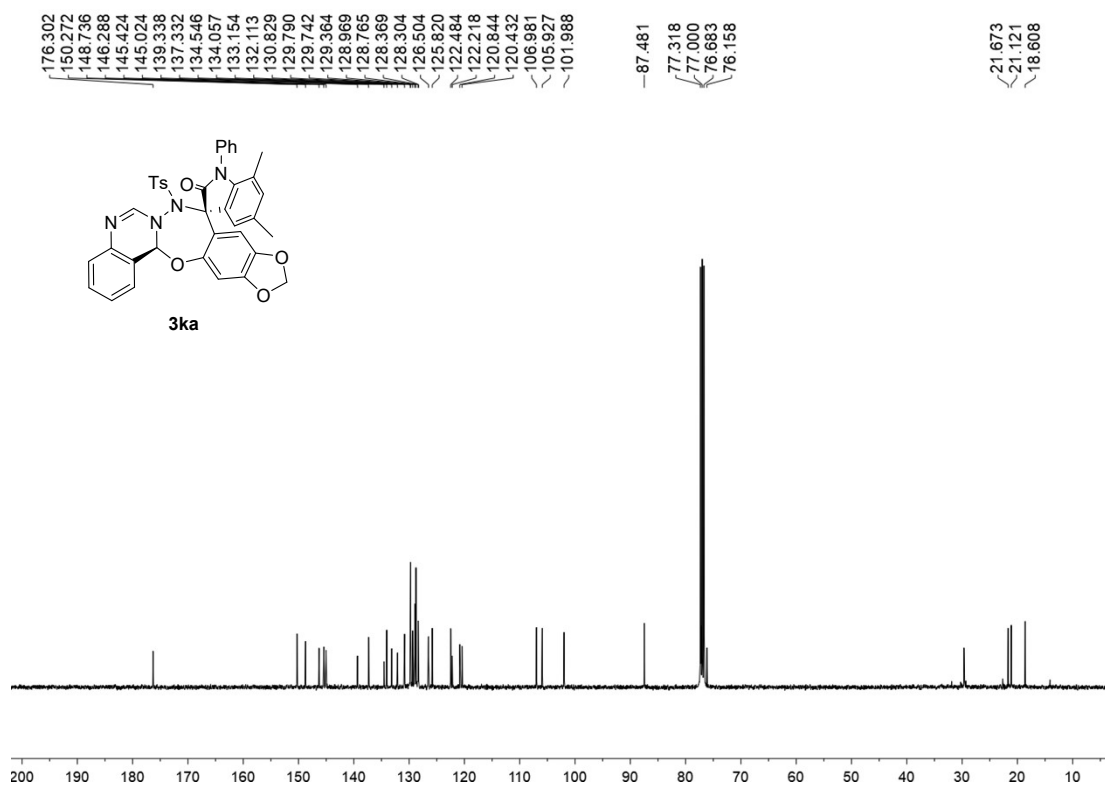

### HPLC Spectra of Compound **3ka**

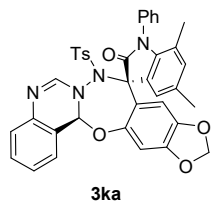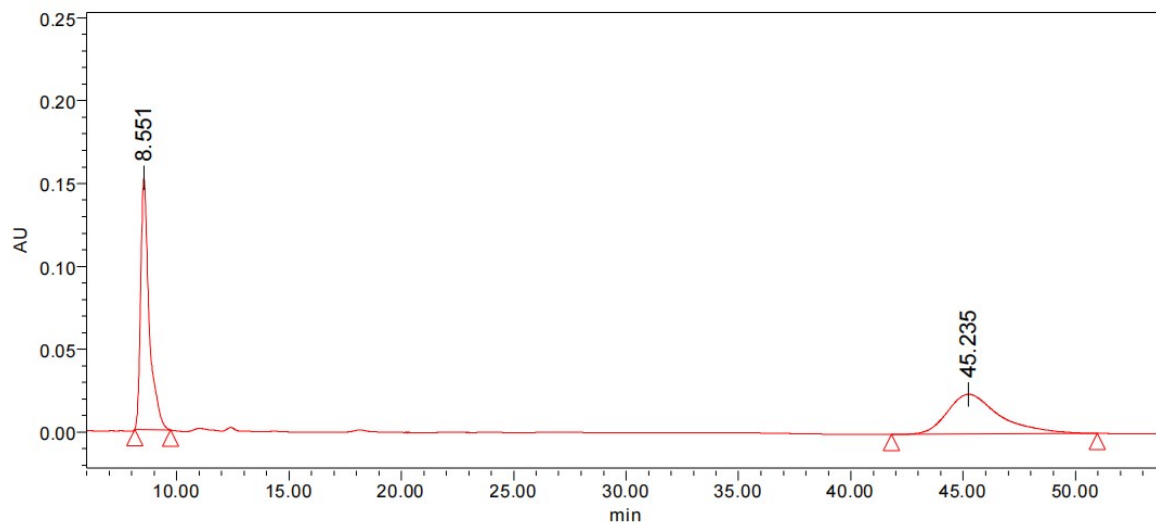

|   | RetTime [min] | Area [mAU*s] | Area% |
|---|---------------|--------------|-------|
| 1 | 8.551         | 4006122      | 50.74 |
| 2 | 45.235        | 3889507      | 49.26 |

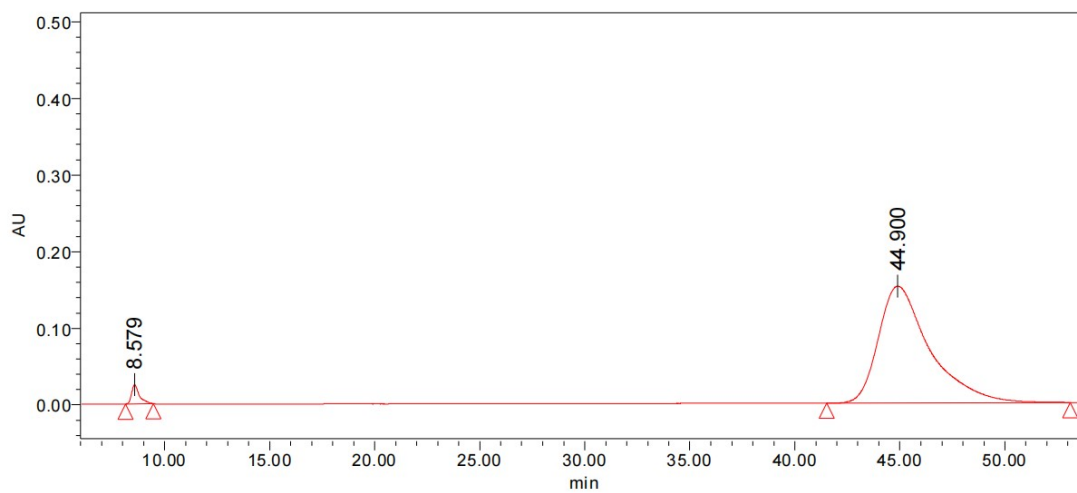

|   | RetTime [min] | Area [mAU*s] | Area% |
|---|---------------|--------------|-------|
| 1 | 8.579         | 648005       | 2.45  |
| 2 | 44.900        | 25822507     | 97.55 |

<sup>1</sup>H NMR Spectrum of Compound **3la** (400 MHz, CDCl<sub>3</sub>)

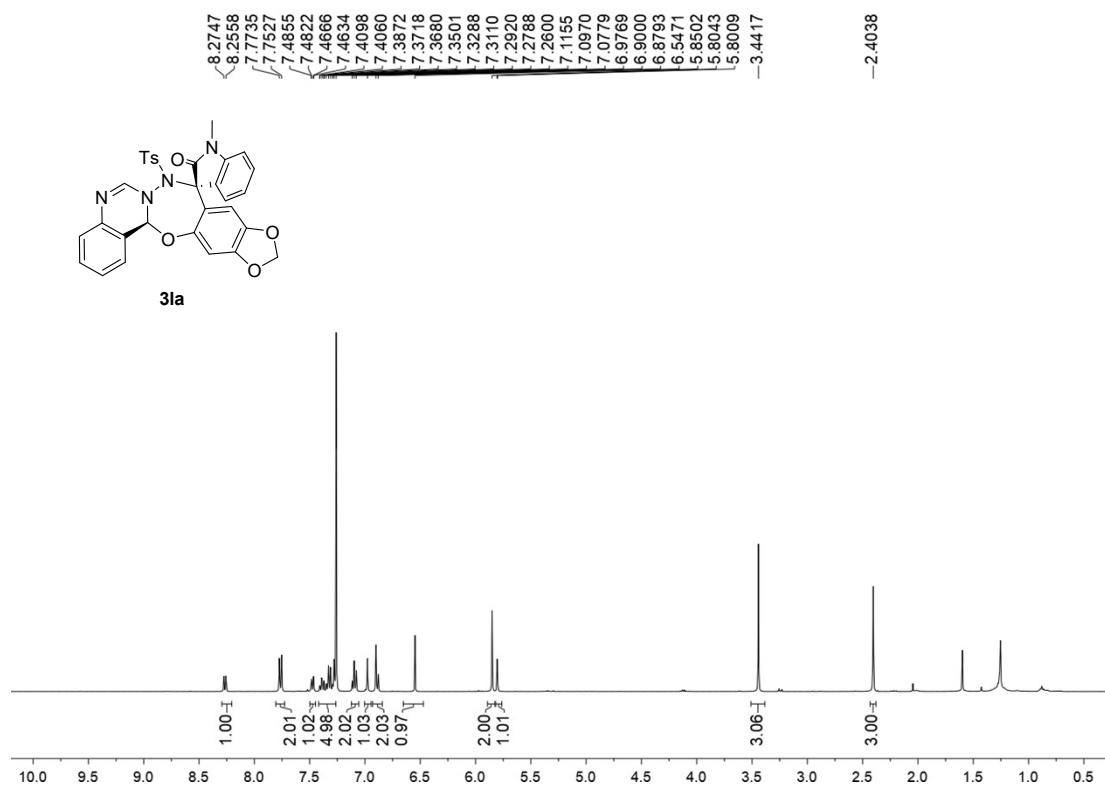

<sup>13</sup>C{<sup>1</sup>H} NMR Spectrum of Compound **3la** (101 MHz, CDCl<sub>3</sub>)

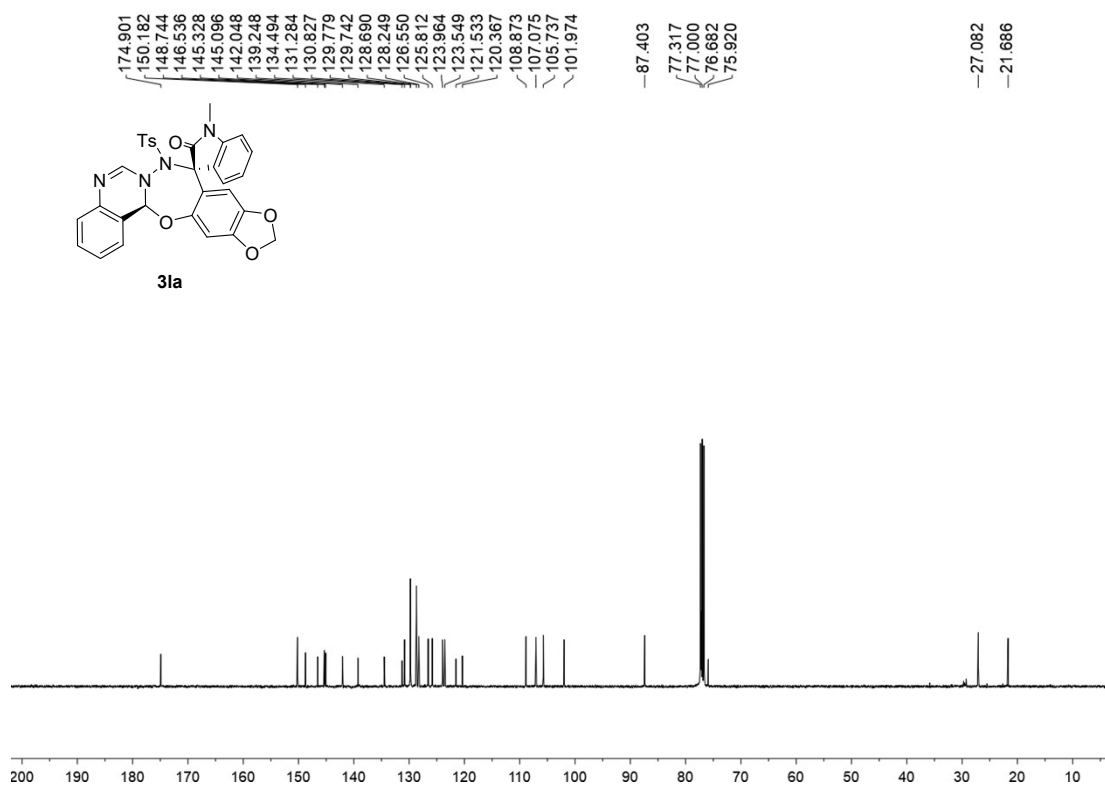



### HPLC Spectra of Compound **31a**

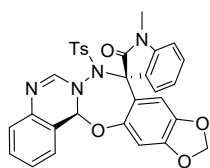

**31a**

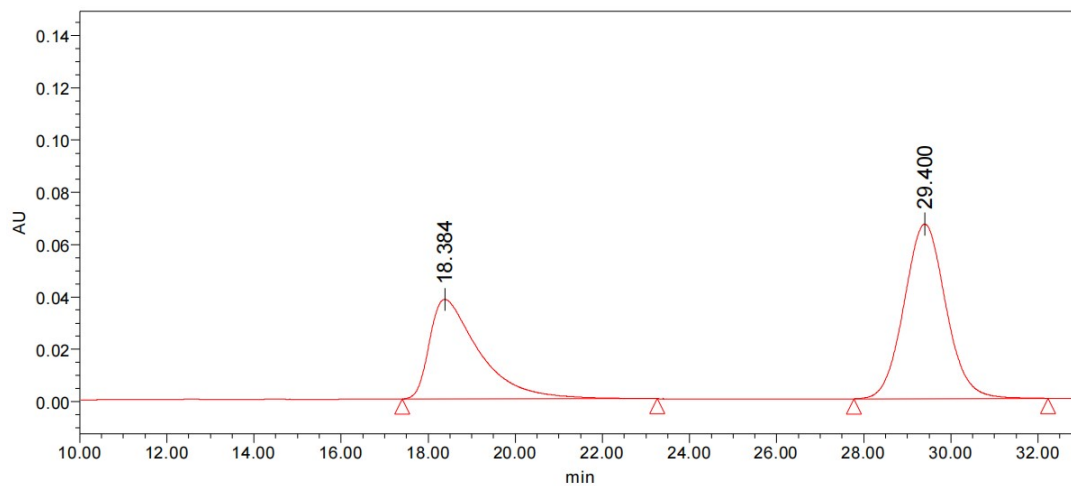

|   | RetTime [min] | Area [mAU*s] | Area% |
|---|---------------|--------------|-------|
| 1 | 18.384        | 3019859      | 40.49 |
| 2 | 29.400        | 4439106      | 59.51 |

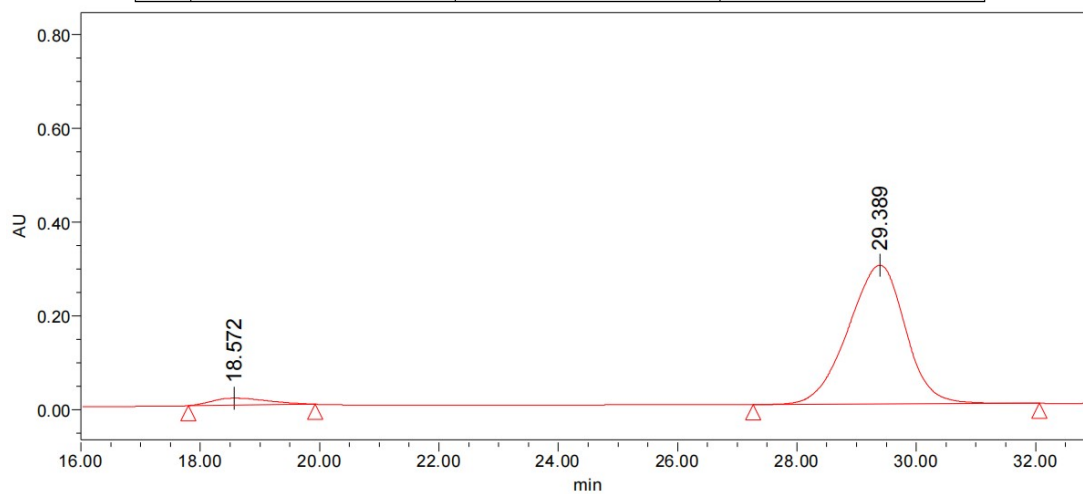

|   | RetTime [min] | Area [mAU*s] | Area% |
|---|---------------|--------------|-------|
| 1 | 18.572        | 961907       | 4.65  |
| 2 | 29.389        | 19744953     | 95.35 |

<sup>1</sup>H NMR Spectrum of Compound **3ma** (400 MHz, CDCl<sub>3</sub>)

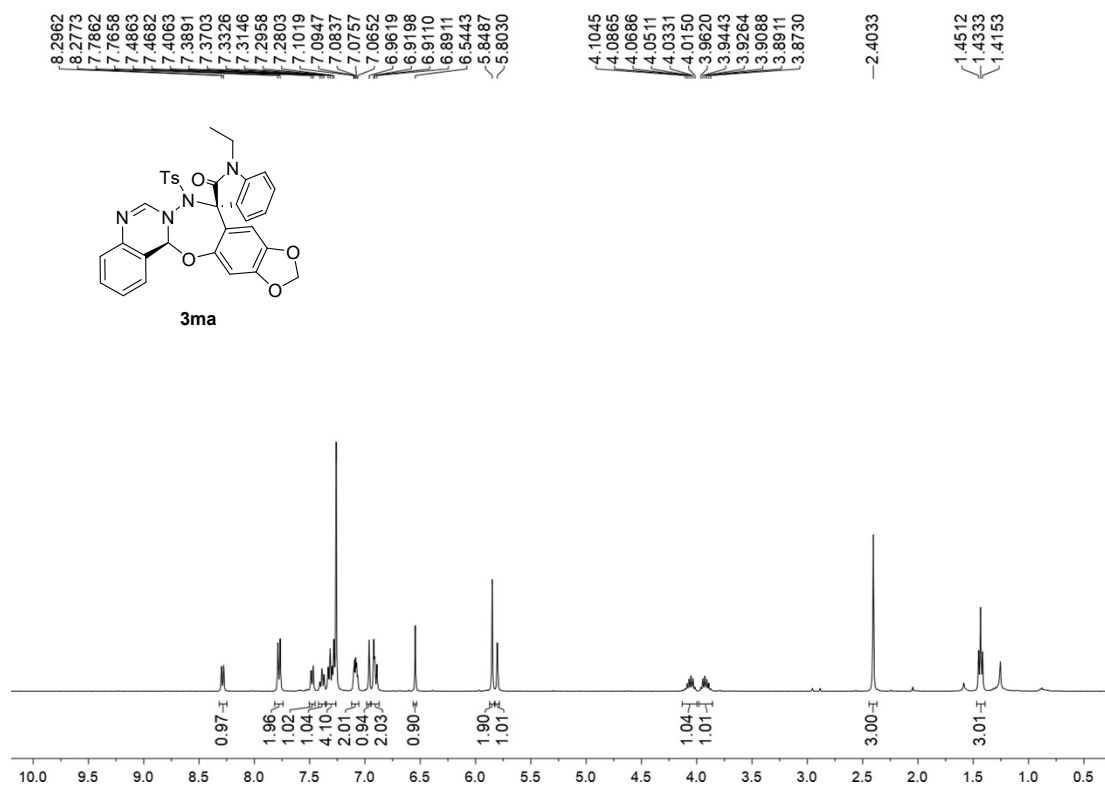

<sup>13</sup>C{<sup>1</sup>H} NMR Spectrum of Compound **3ma** (101 MHz, CDCl<sub>3</sub>)

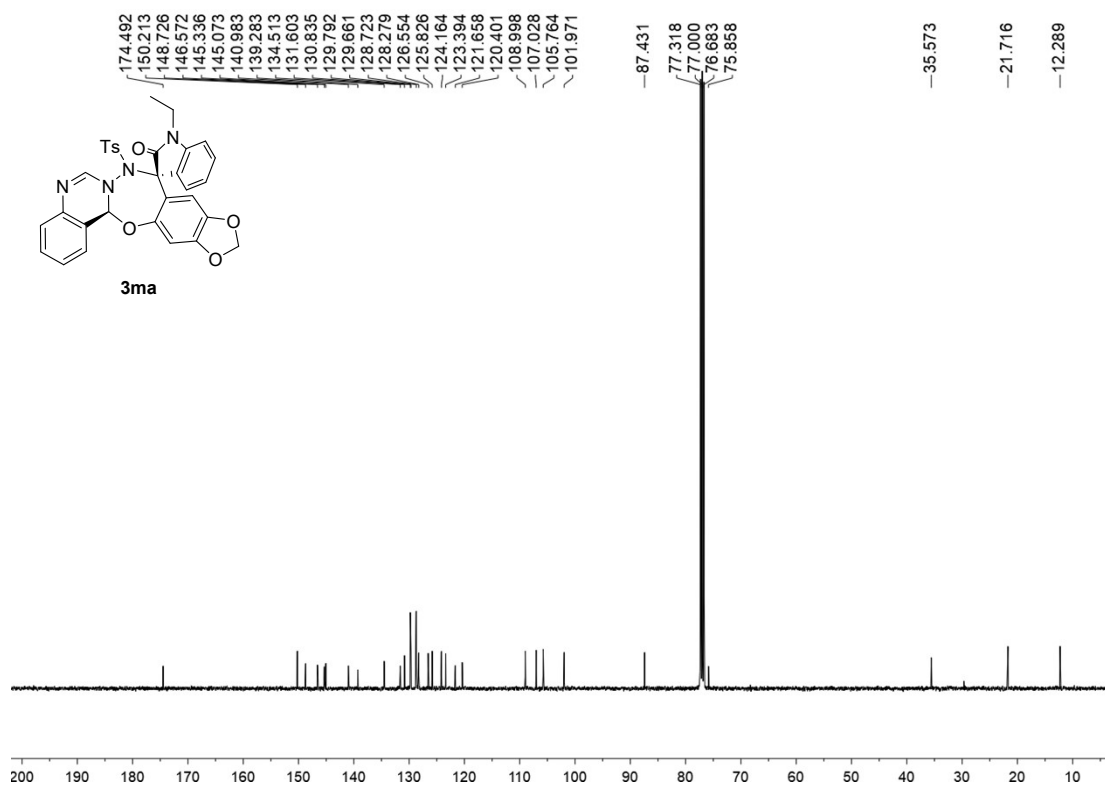

### HPLC Spectra of Compound **3ma**

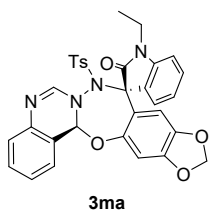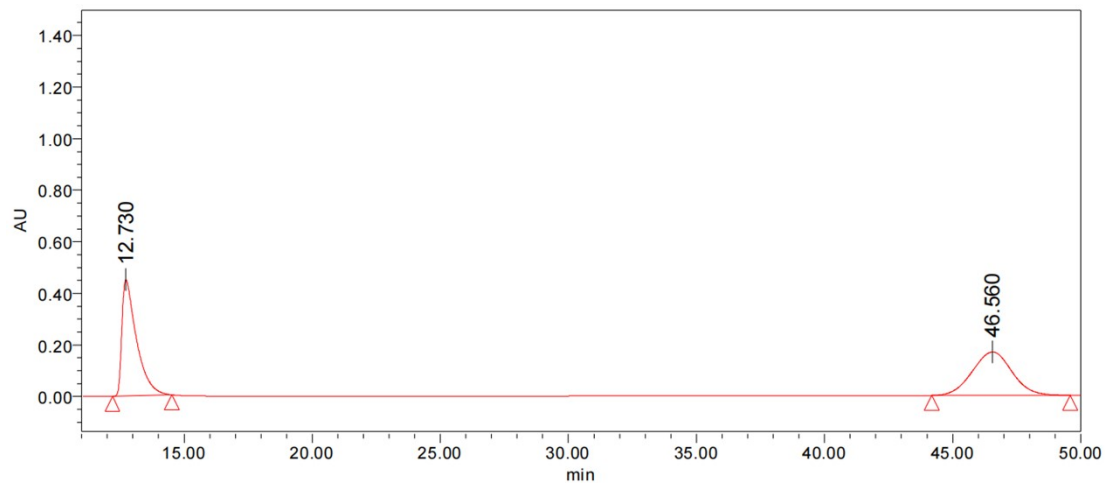

|   | RetTime [min] | Area [mAU*s] | Area% |
|---|---------------|--------------|-------|
| 1 | 12.730        | 17969735     | 49.70 |
| 2 | 46.560        | 18187957     | 50.30 |

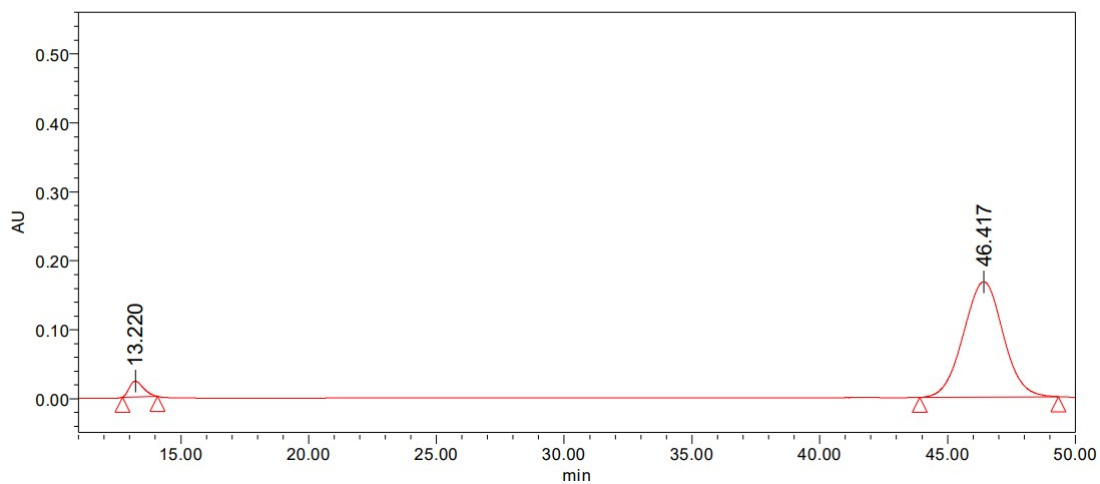

|   | RetTime [min] | Area [mAU*s] | Area% |
|---|---------------|--------------|-------|
| 1 | 13.220        | 866655       | 4.58  |
| 2 | 46.417        | 18041377     | 95.42 |

<sup>1</sup>H NMR Spectrum of Compound **3na** (400 MHz, CDCl<sub>3</sub>)

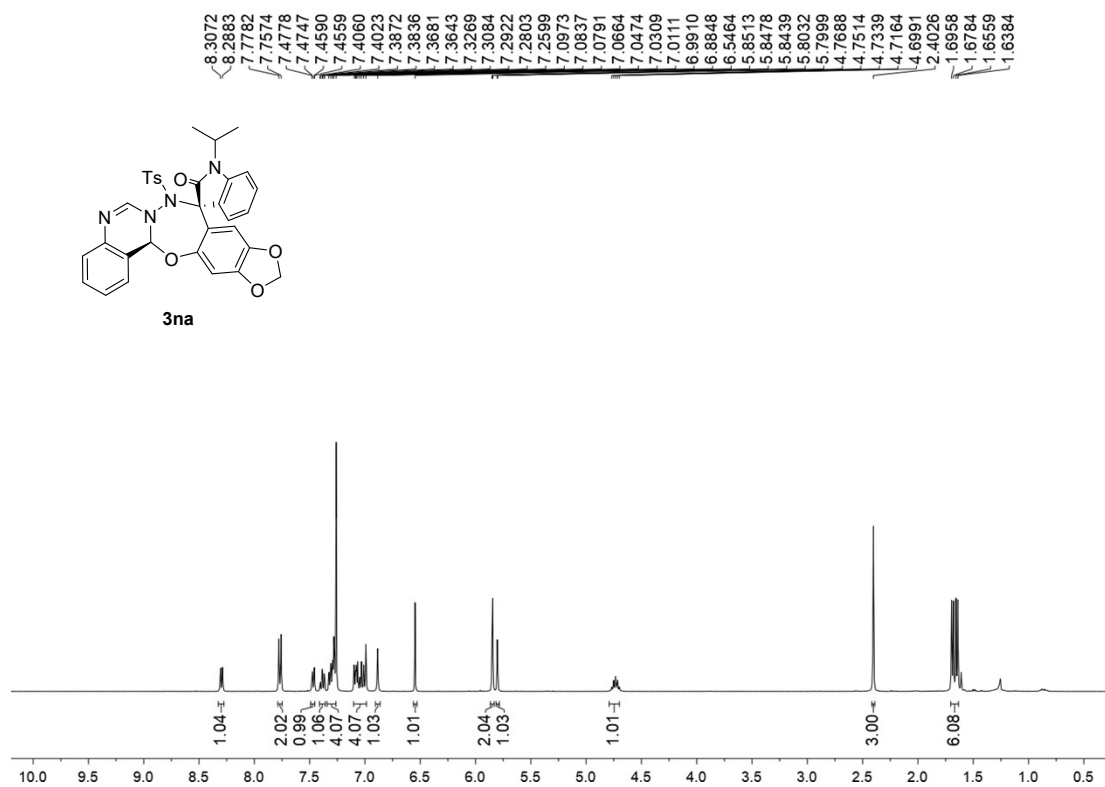

<sup>13</sup>C{<sup>1</sup>H} NMR Spectrum of Compound **3na** (101 MHz, CDCl<sub>3</sub>)

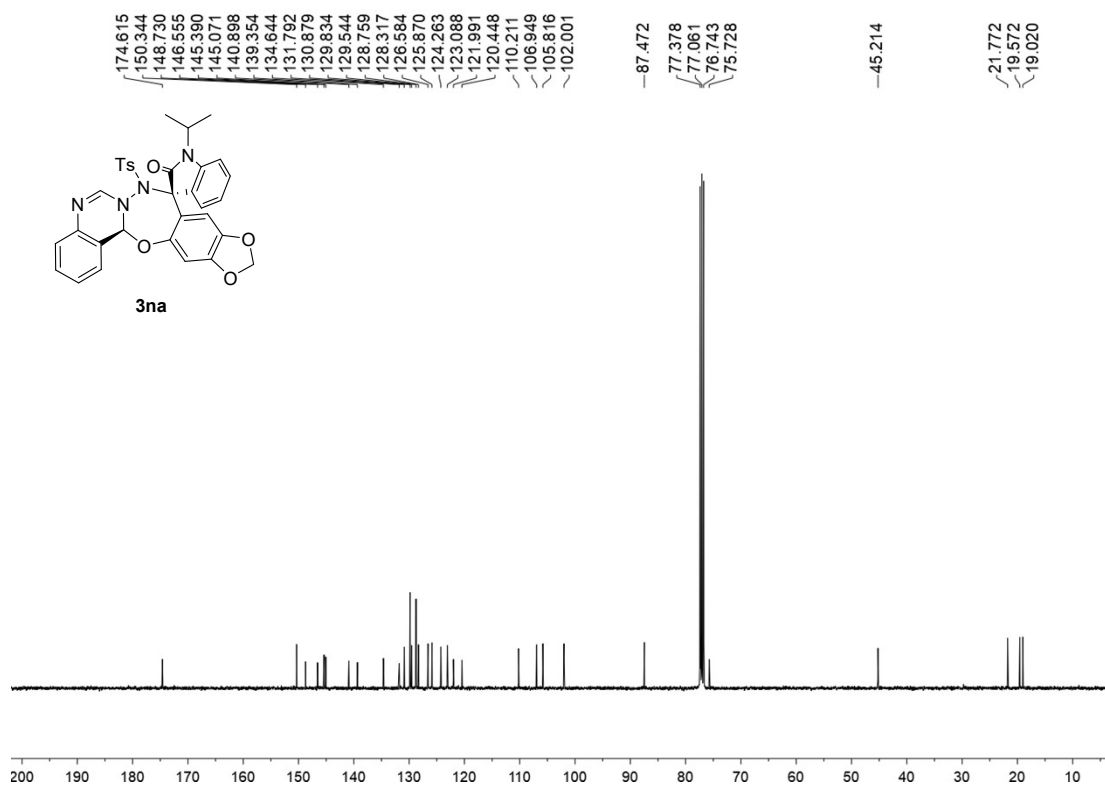

### HPLC Spectra of Compound **3na**

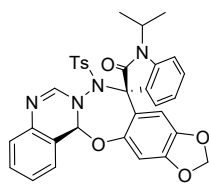

**3na**

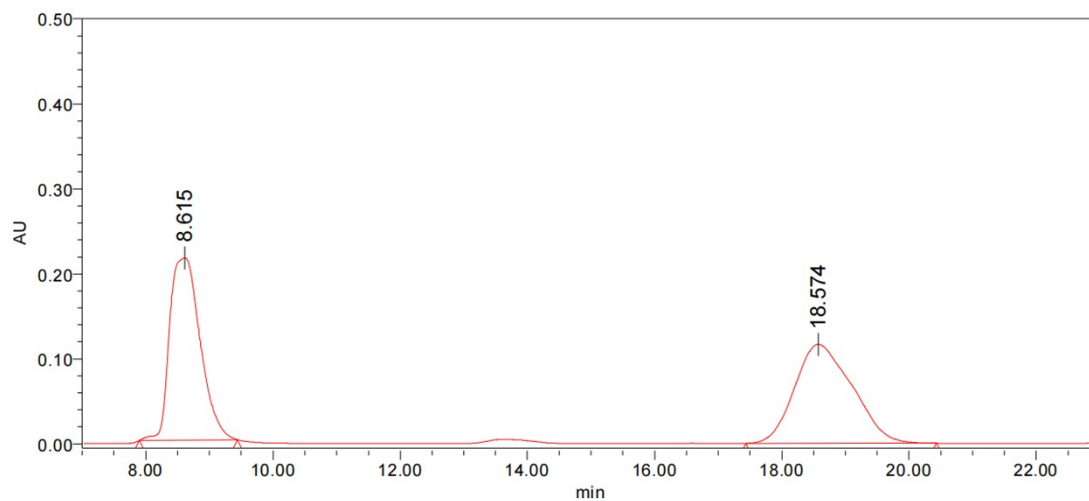

|   | RetTime [min] | Area [mAU*s] | Area% |
|---|---------------|--------------|-------|
| 1 | 8.615         | 7165680      | 49.47 |
| 2 | 18.574        | 7320235      | 50.53 |

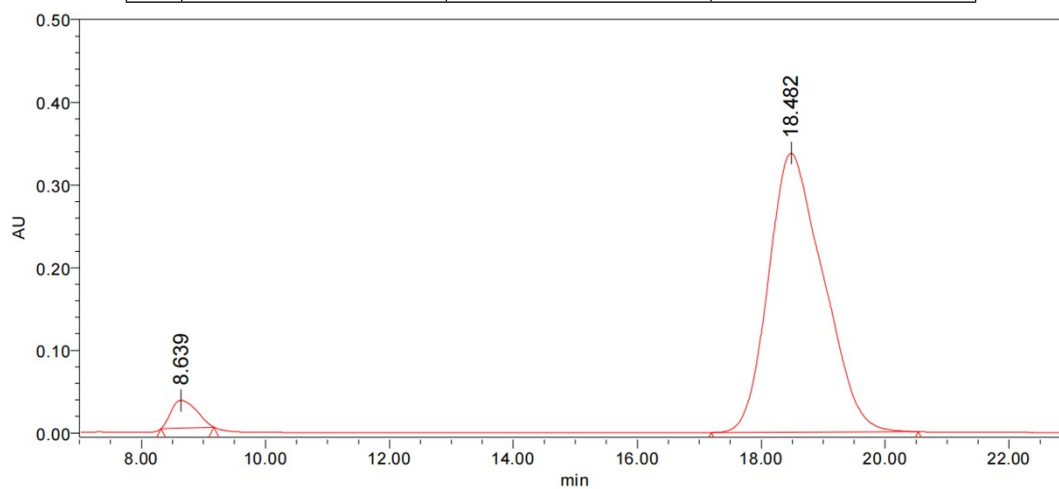

|   | RetTime [min] | Area [mAU*s] | Area% |
|---|---------------|--------------|-------|
| 1 | 8.639         | 947726       | 4.37  |
| 2 | 18.482        | 20721687     | 95.63 |

<sup>1</sup>H NMR Spectrum of Compound **30a** (400 MHz, CDCl<sub>3</sub>)

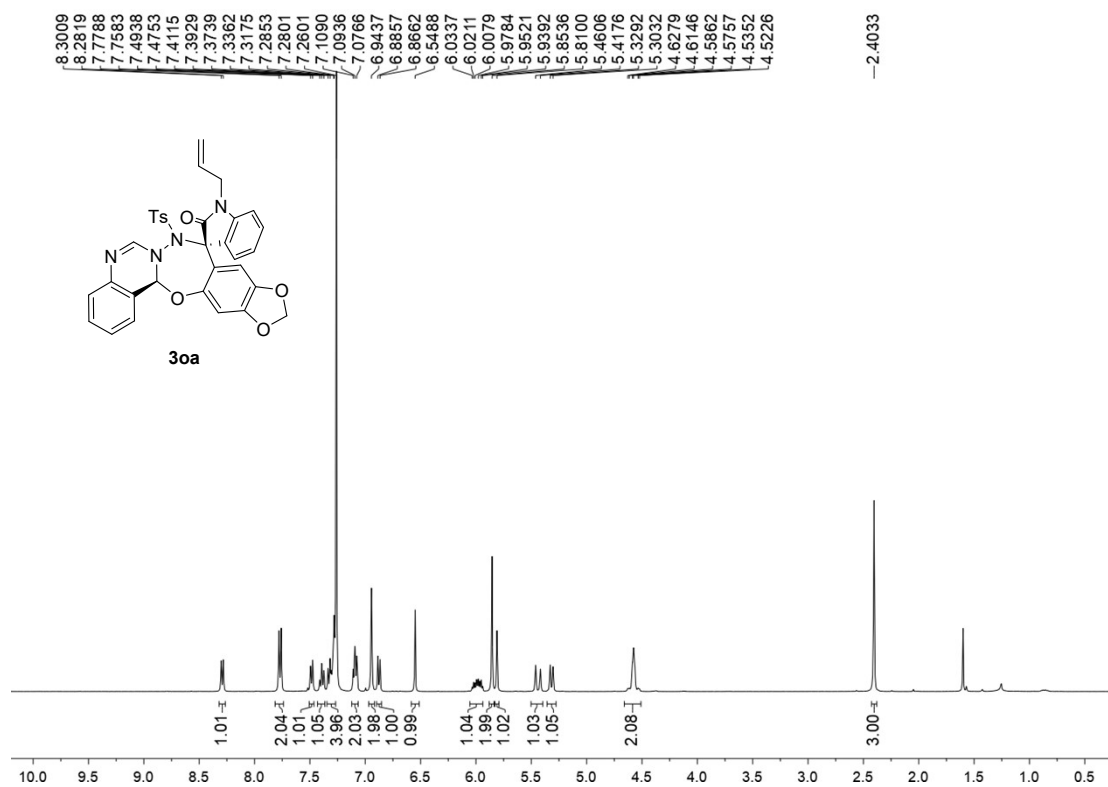

<sup>13</sup>C{<sup>1</sup>H} NMR Spectrum of Compound **30a** (101 MHz, CDCl<sub>3</sub>)

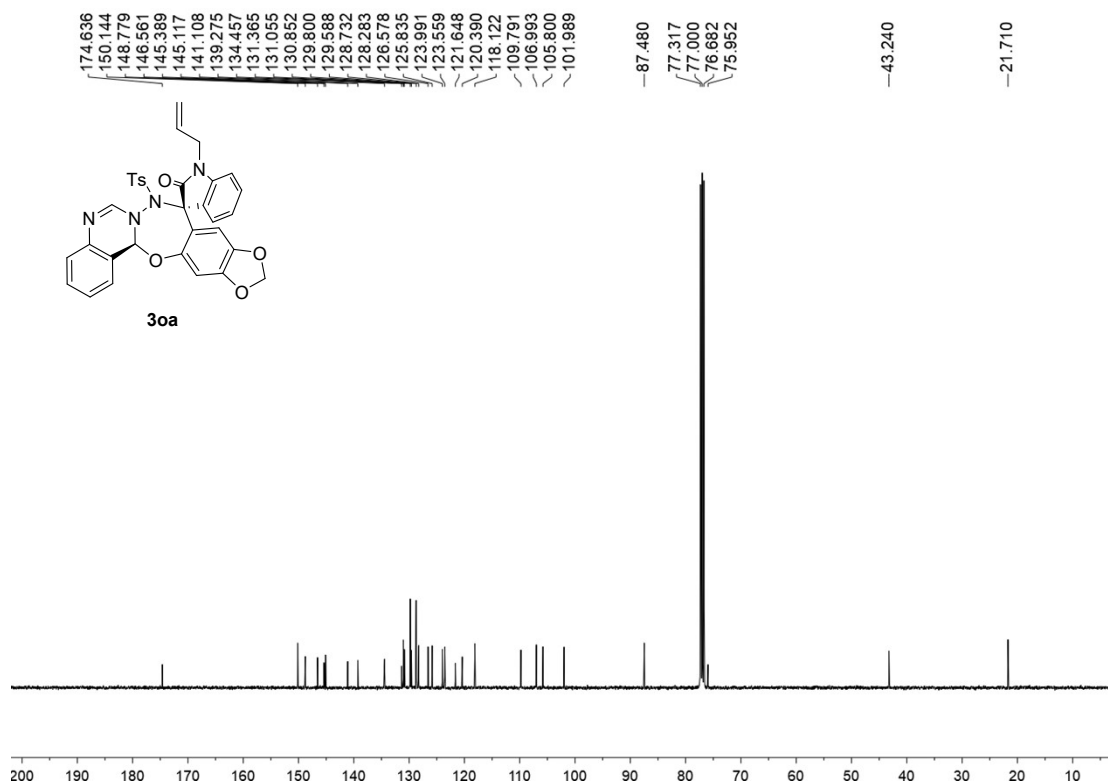

### HPLC Spectra of Compound **3oa**

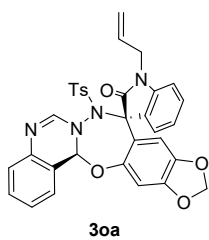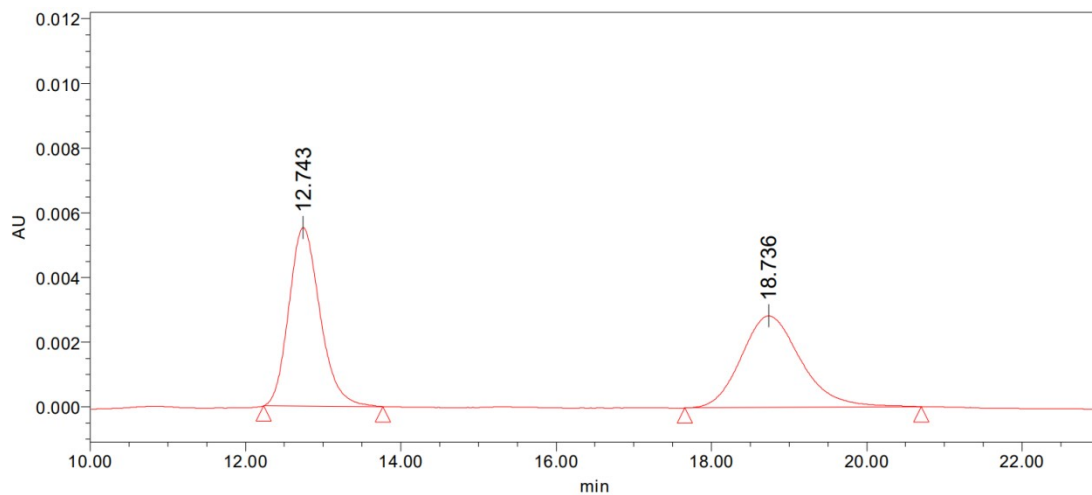

|   | RetTime [min] | Area [mAU*s] | Area% |
|---|---------------|--------------|-------|
| 1 | 15.552        | 20903811     | 50.29 |
| 2 | 44.772        | 20660125     | 49.71 |

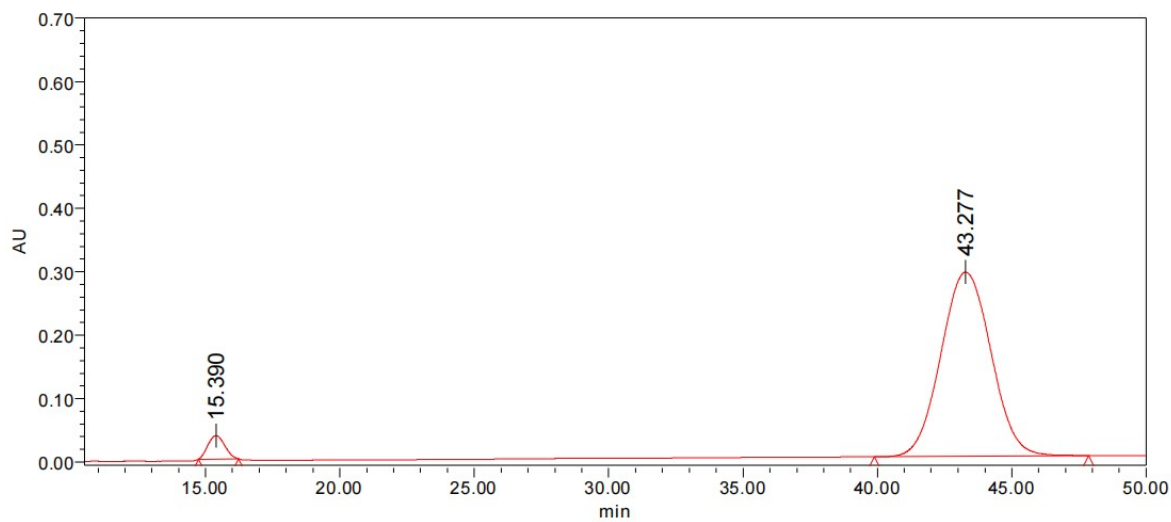

|   | RetTime [min] | Area [mAU*s] | Area% |
|---|---------------|--------------|-------|
| 1 | 15.390        | 1596010      | 4.06  |
| 2 | 43.277        | 37689300     | 95.94 |

<sup>1</sup>H NMR Spectrum of Compound **3pa** (400 MHz, CDCl<sub>3</sub>)

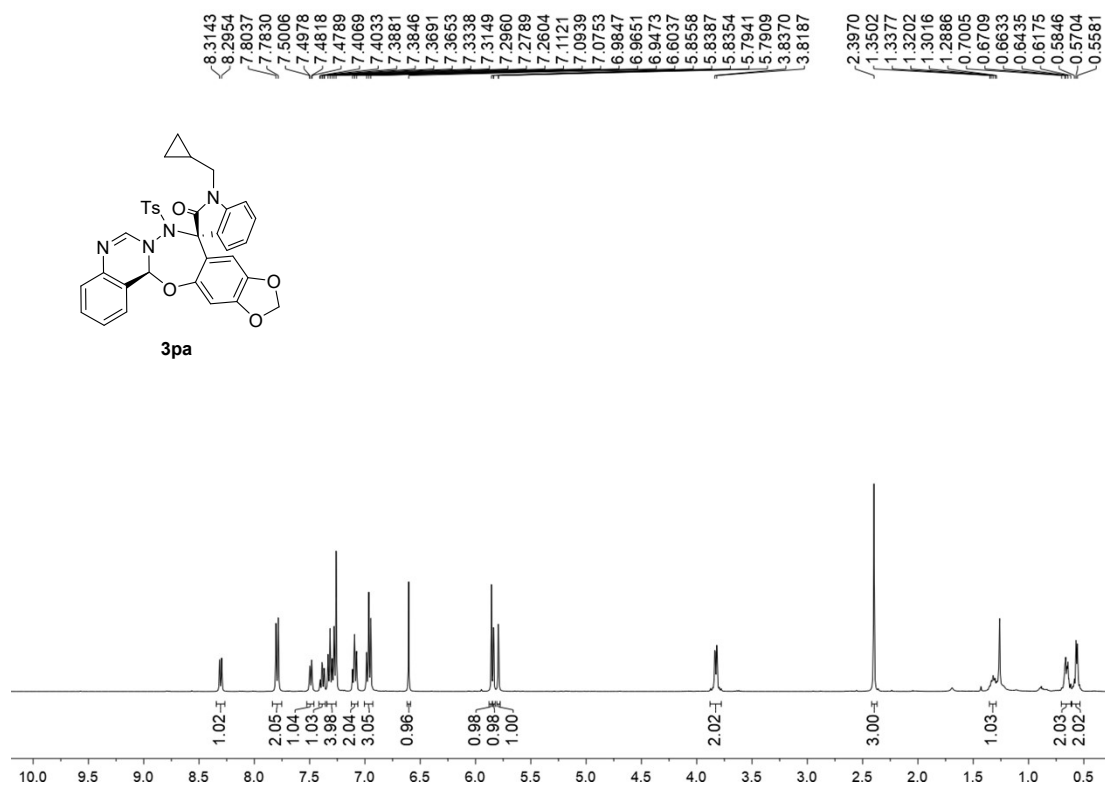

<sup>13</sup>C{<sup>1</sup>H} NMR Spectrum of Compound **3pa** (101 MHz, CDCl<sub>3</sub>)

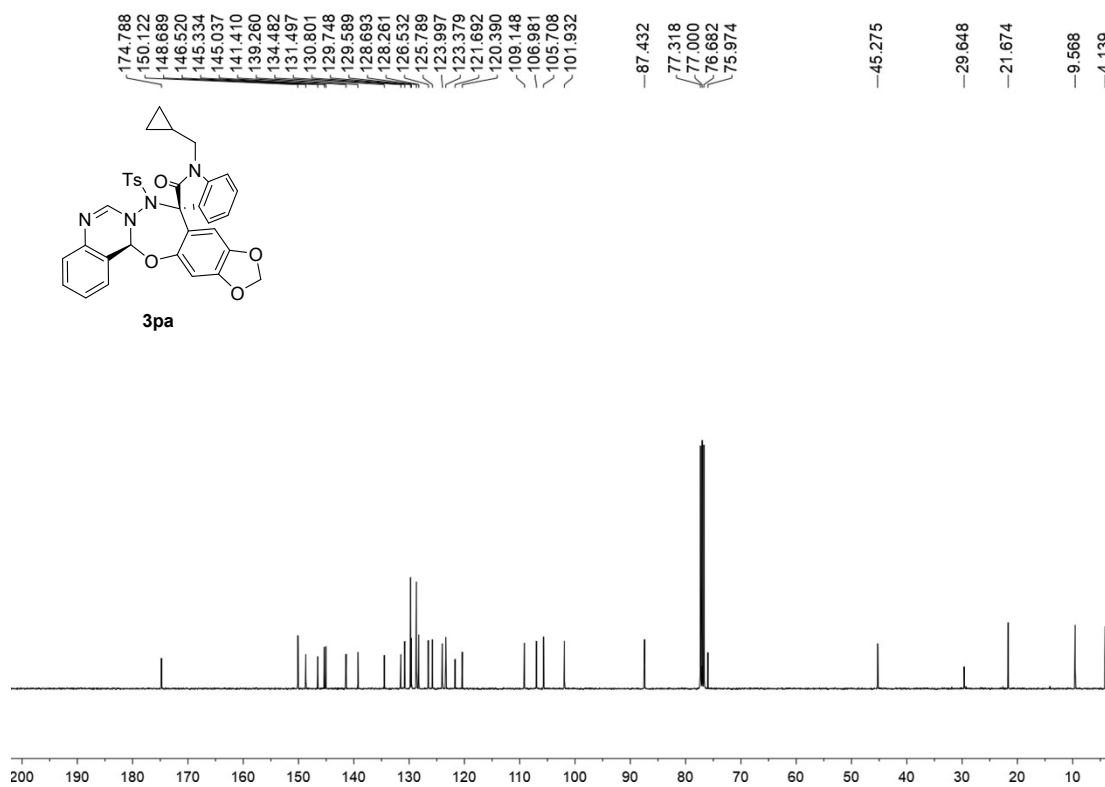



### HPLC Spectra of Compound **3pa**

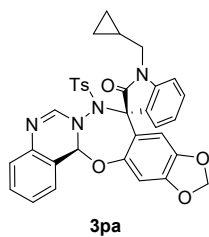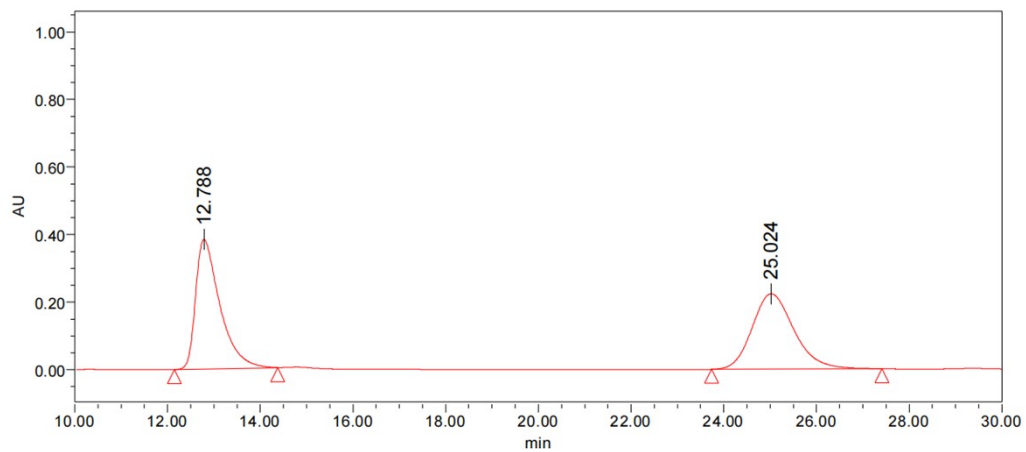

|   | RetTime [min] | Area [mAU*s] | Area% |
|---|---------------|--------------|-------|
| 1 | 12.788        | 13960894     | 49.93 |
| 2 | 25.024        | 13999808     | 50.07 |

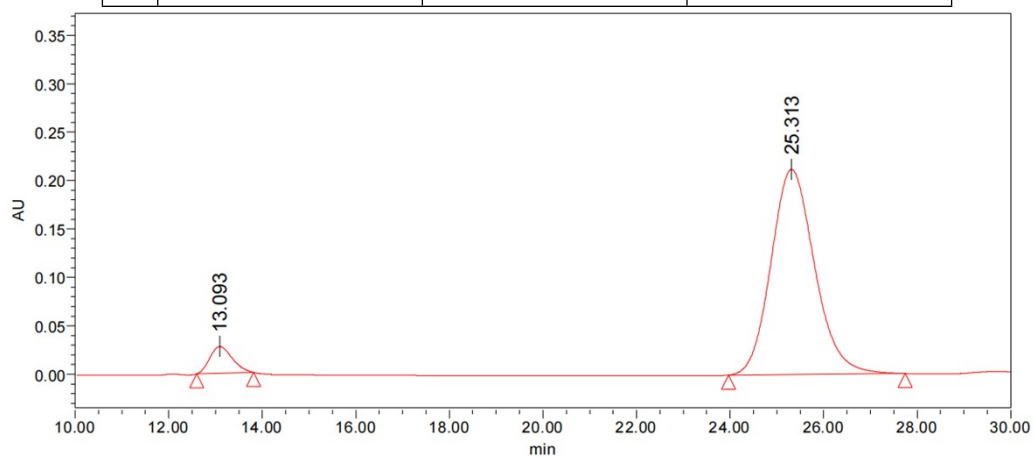

|   | RetTime [min] | Area [mAU*s] | Area% |
|---|---------------|--------------|-------|
| 1 | 13.093        | 920600       | 6.29  |
| 2 | 25.313        | 13722697     | 93.71 |

<sup>1</sup>H NMR Spectrum of Compound **3qa** (400 MHz, CDCl<sub>3</sub>)

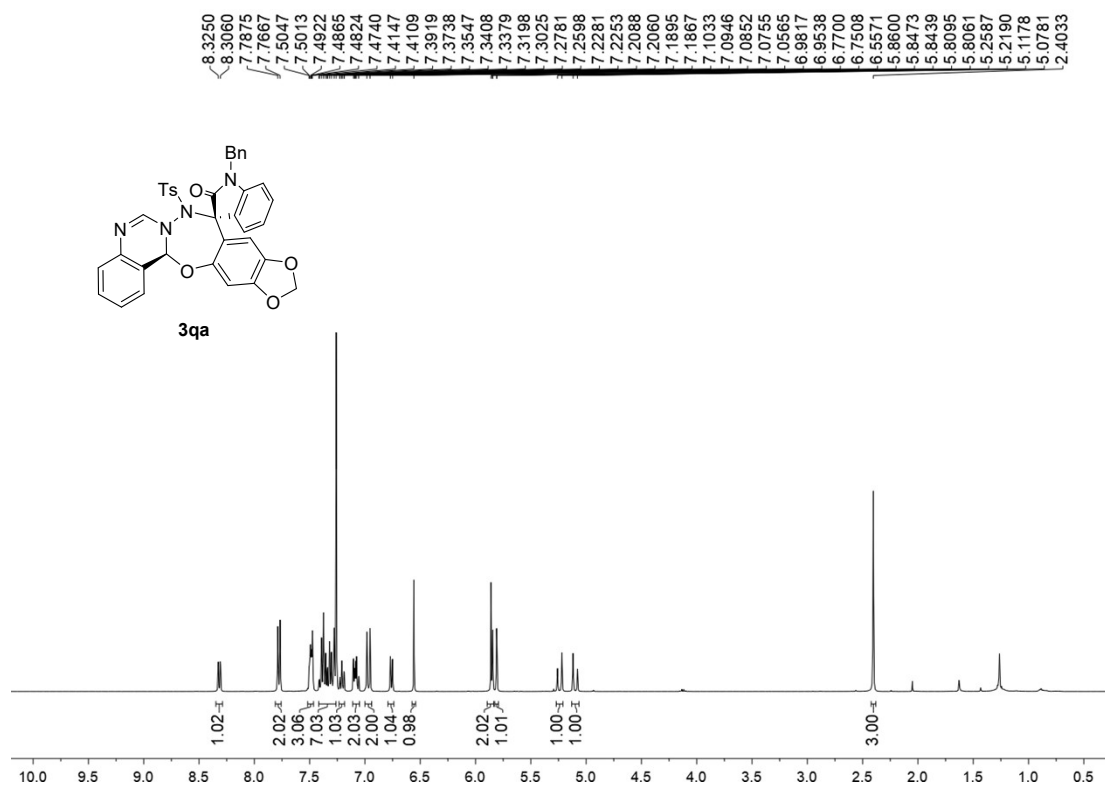

<sup>13</sup>C{<sup>1</sup>H} NMR Spectrum of Compound **3qa** (101 MHz, CDCl<sub>3</sub>)

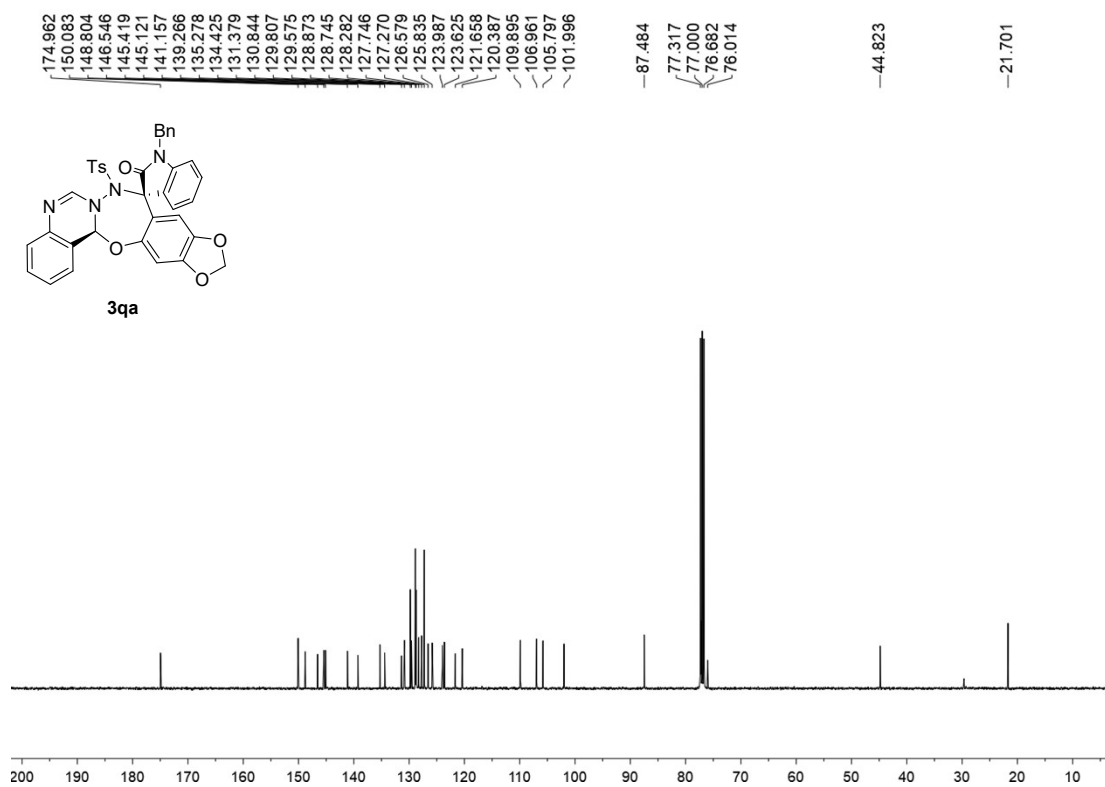

### HPLC Spectra of Compound **3qa**

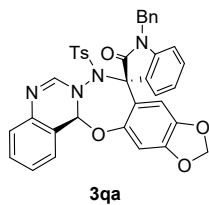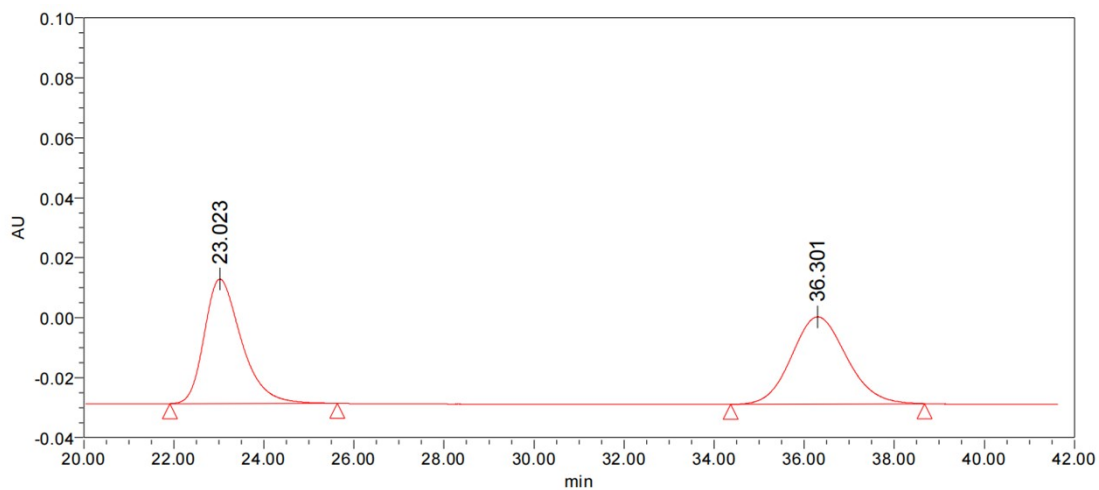

|   | RetTime [min] | Area [mAU*s] | Area% |
|---|---------------|--------------|-------|
| 1 | 23.023        | 2380150      | 49.19 |
| 2 | 36.301        | 2458453      | 50.81 |

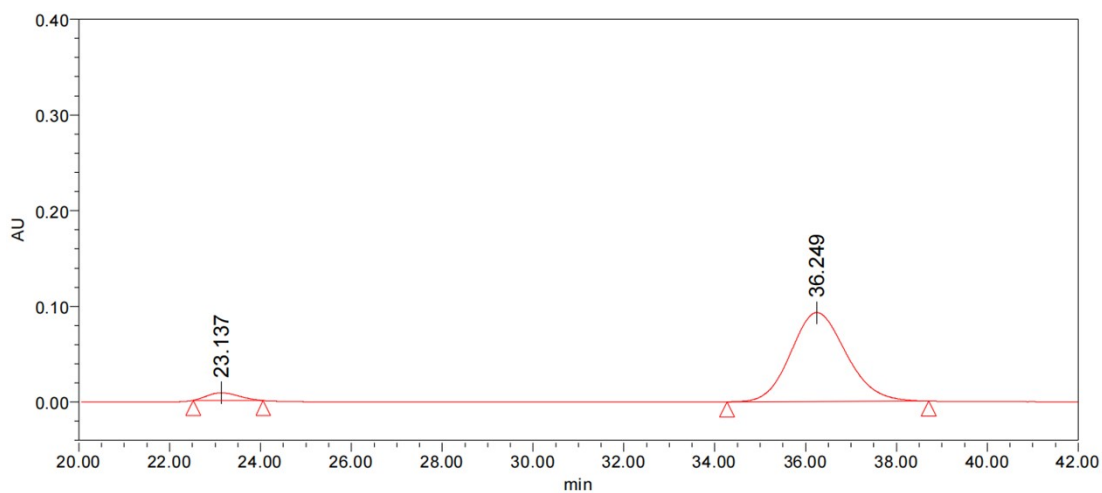

|   | RetTime [min] | Area [mAU*s] | Area% |
|---|---------------|--------------|-------|
| 1 | 23.137        | 381839       | 4.63  |
| 2 | 36.249        | 7865648      | 95.37 |

<sup>1</sup>H NMR Spectrum of Compound **3ab** (400 MHz, CDCl<sub>3</sub>)

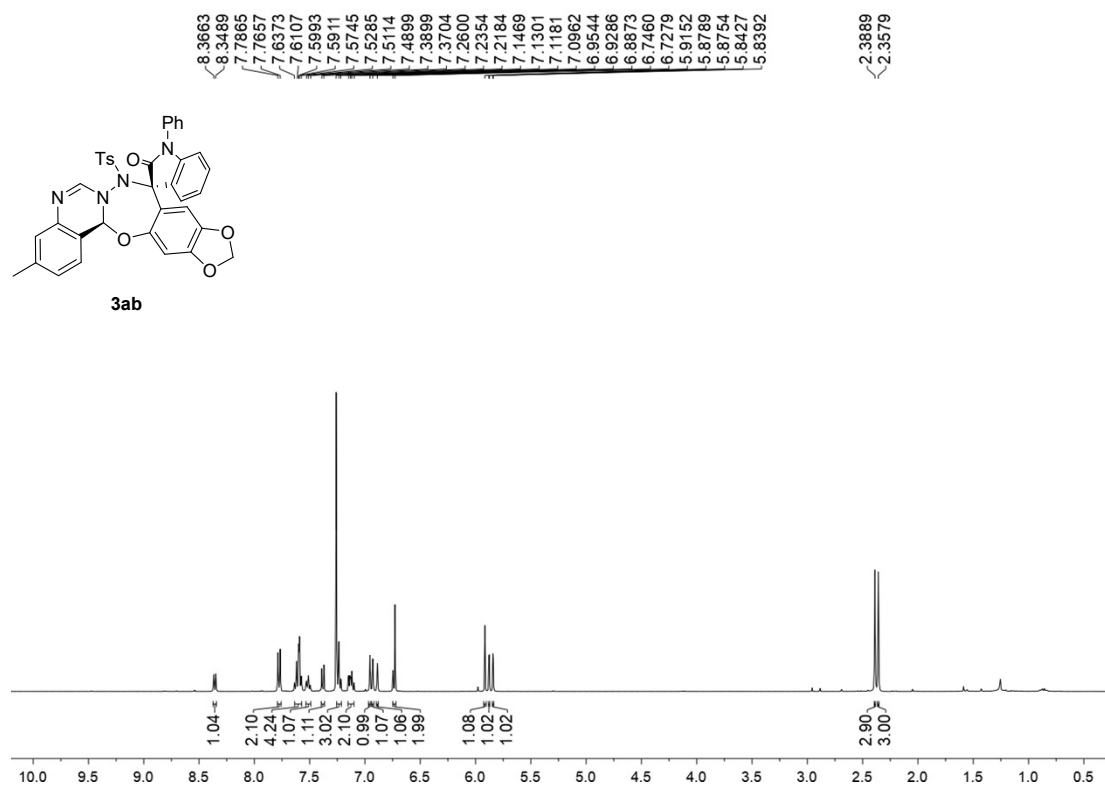

<sup>13</sup>C{<sup>1</sup>H} NMR Spectrum of Compound **3ab** (101 MHz, CDCl<sub>3</sub>)

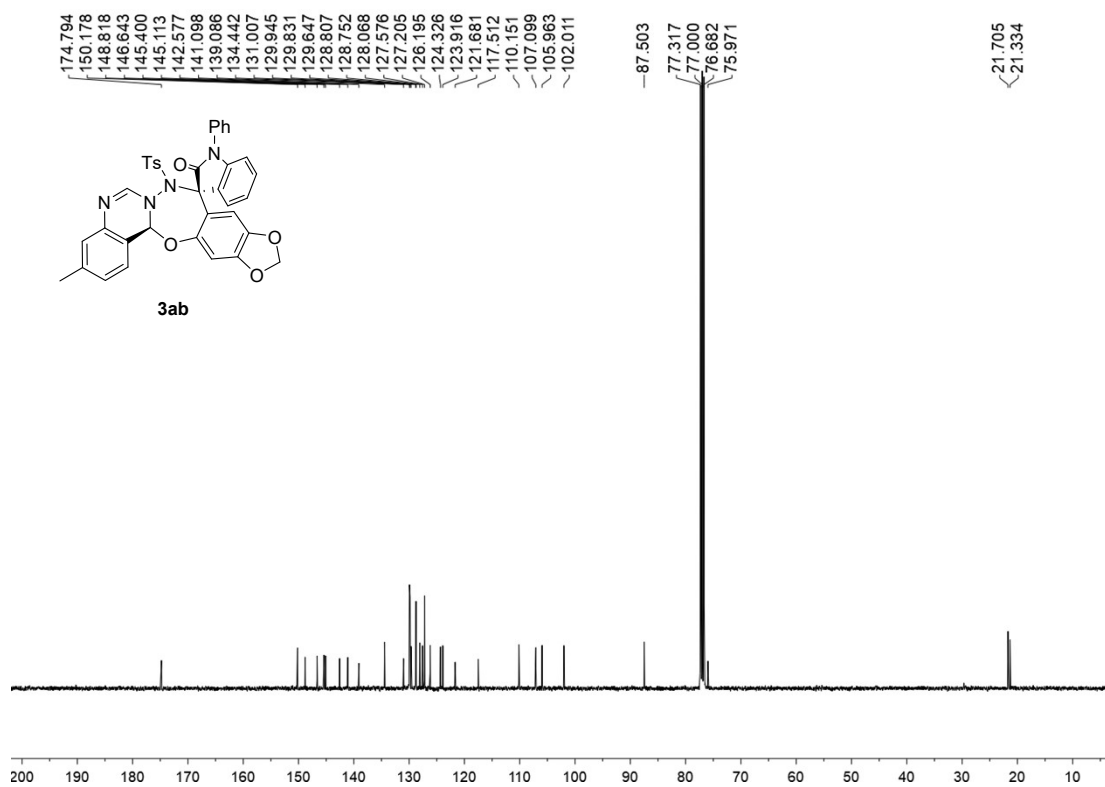

### HPLC Spectra of Compound **3ab**

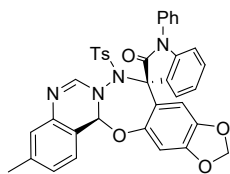

**3ab**

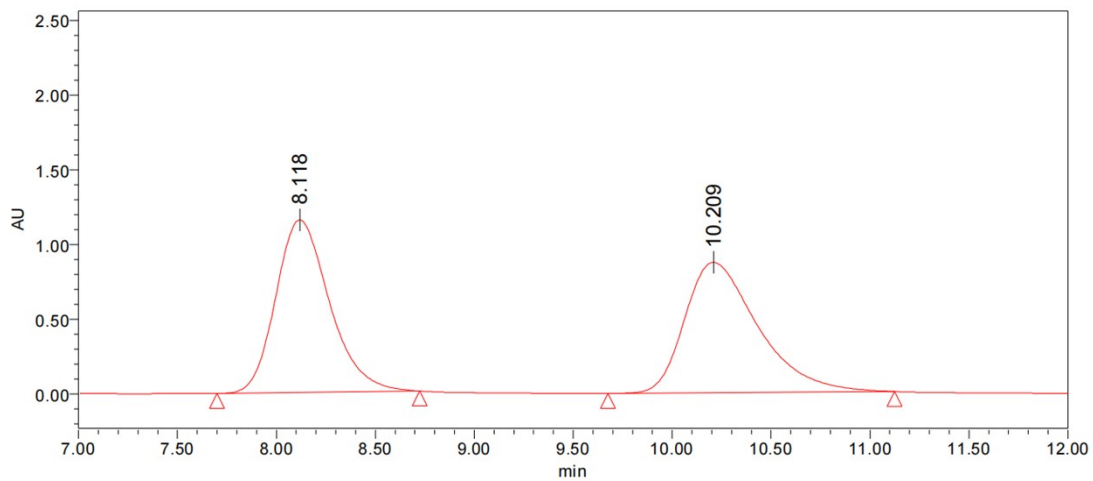

|   | RetTime [min] | Area [mAU*s] | Area% |
|---|---------------|--------------|-------|
| 1 | 8.118         | 21854668     | 49.32 |
| 2 | 10.209        | 22460085     | 50.68 |

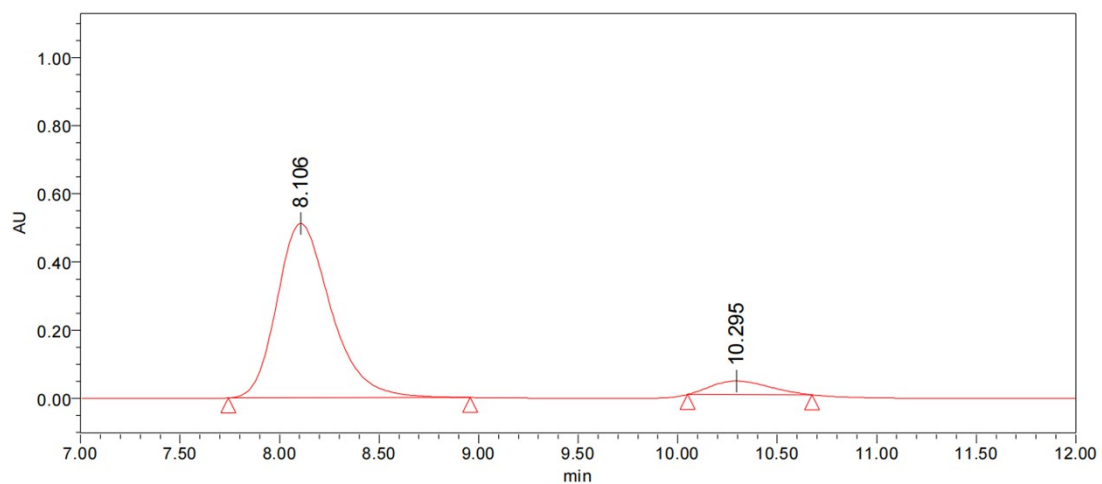

|   | RetTime [min] | Area [mAU*s] | Area% |
|---|---------------|--------------|-------|
| 1 | 8.106         | 9657589      | 92.29 |
| 2 | 10.295        | 806973       | 7.71  |

<sup>1</sup>H NMR Spectrum of Compound **3ac** (400 MHz, CDCl<sub>3</sub>)

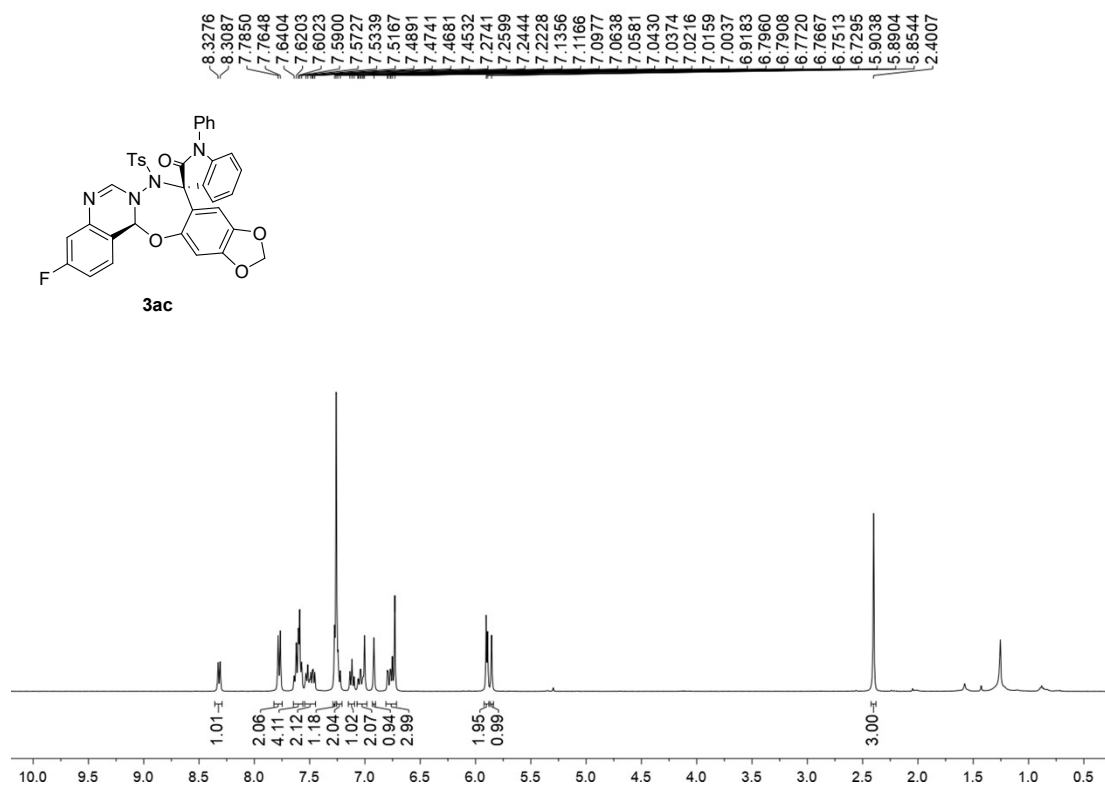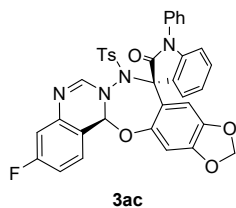

<sup>13</sup>C{<sup>1</sup>H} NMR Spectrum of Compound **3ac** (101 MHz, CDCl<sub>3</sub>)

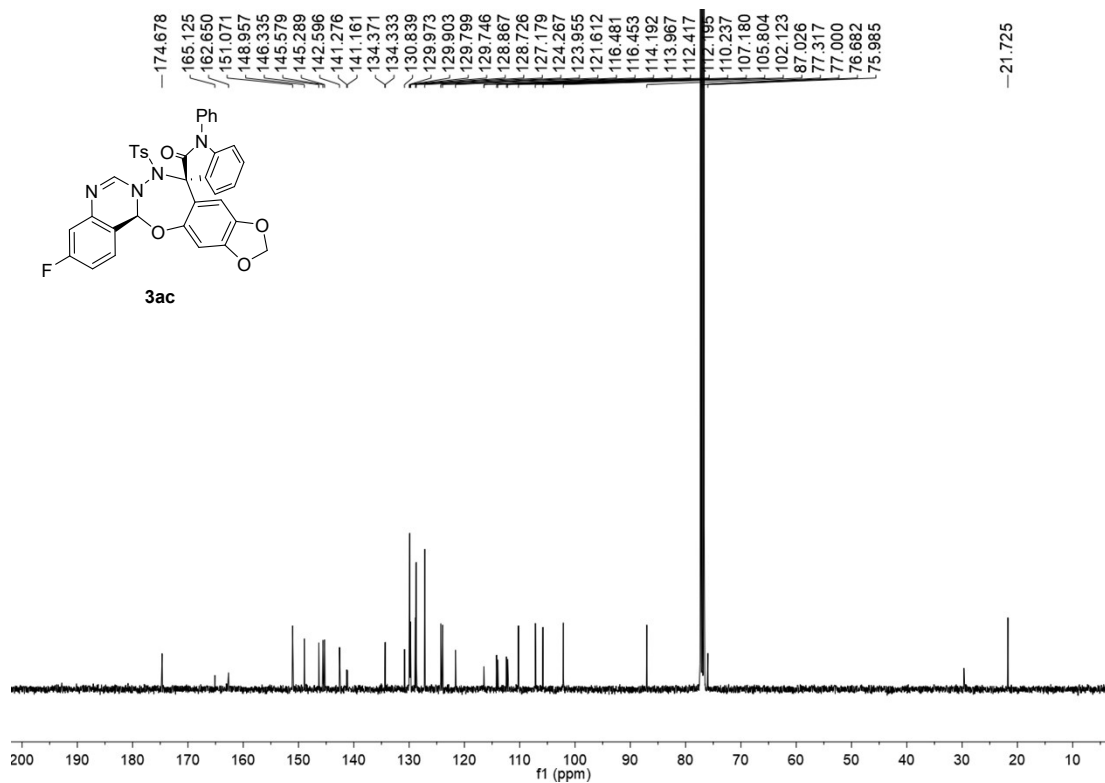

### HPLC Spectra of Compound **3ac**

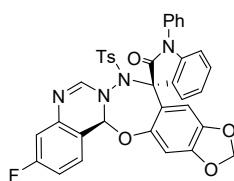

**3ac**

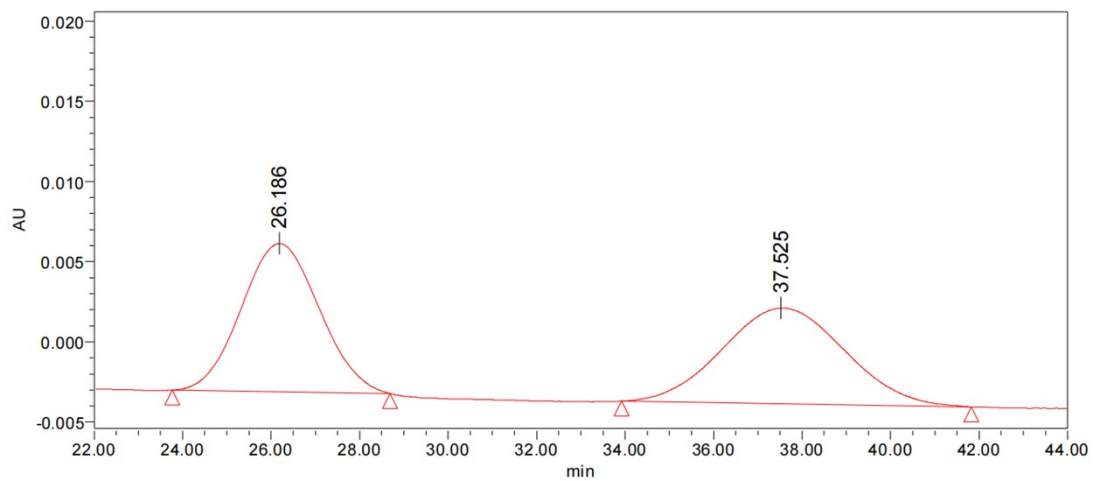

|   | RetTime [min] | Area [mAU*s] | Area% |
|---|---------------|--------------|-------|
| 1 | 26.186        | 1132048      | 49.72 |
| 2 | 37.525        | 1144905      | 50.28 |

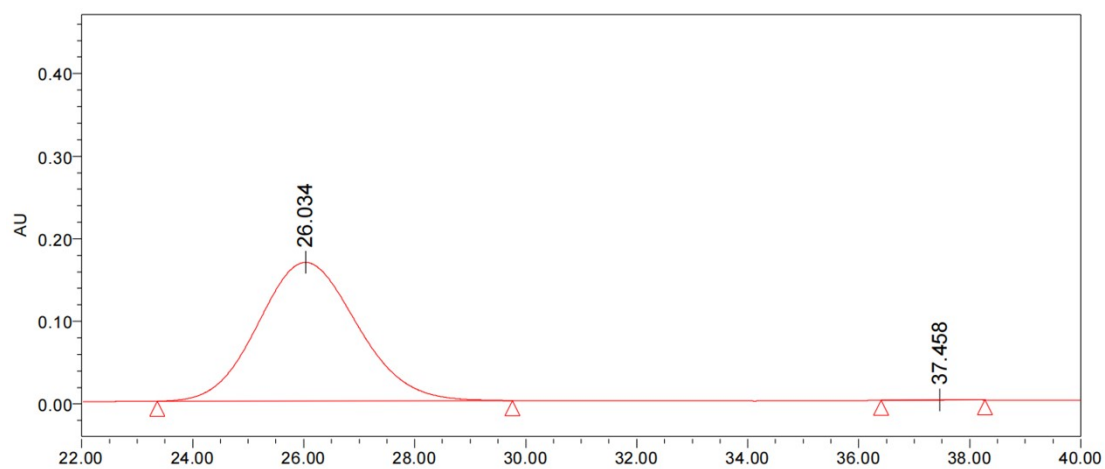

|   | RetTime [min] | Area [mAU*s] | Area% |
|---|---------------|--------------|-------|
| 1 | 26.034        | 20858561     | 99.94 |
| 2 | 37.458        | 12987        | 0.06  |

<sup>1</sup>H NMR Spectrum of Compound **3ad** (400 MHz, CDCl<sub>3</sub>)

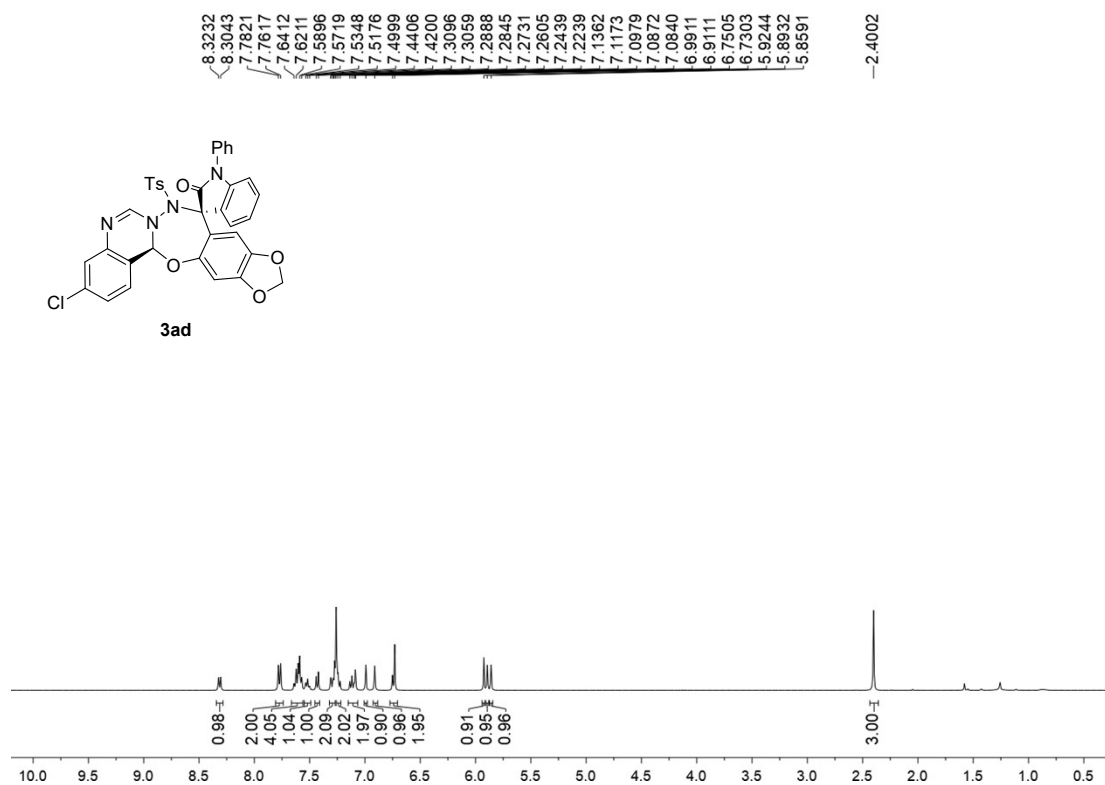

<sup>13</sup>C{<sup>1</sup>H} NMR Spectrum of Compound **3ad** (101 MHz, CDCl<sub>3</sub>)

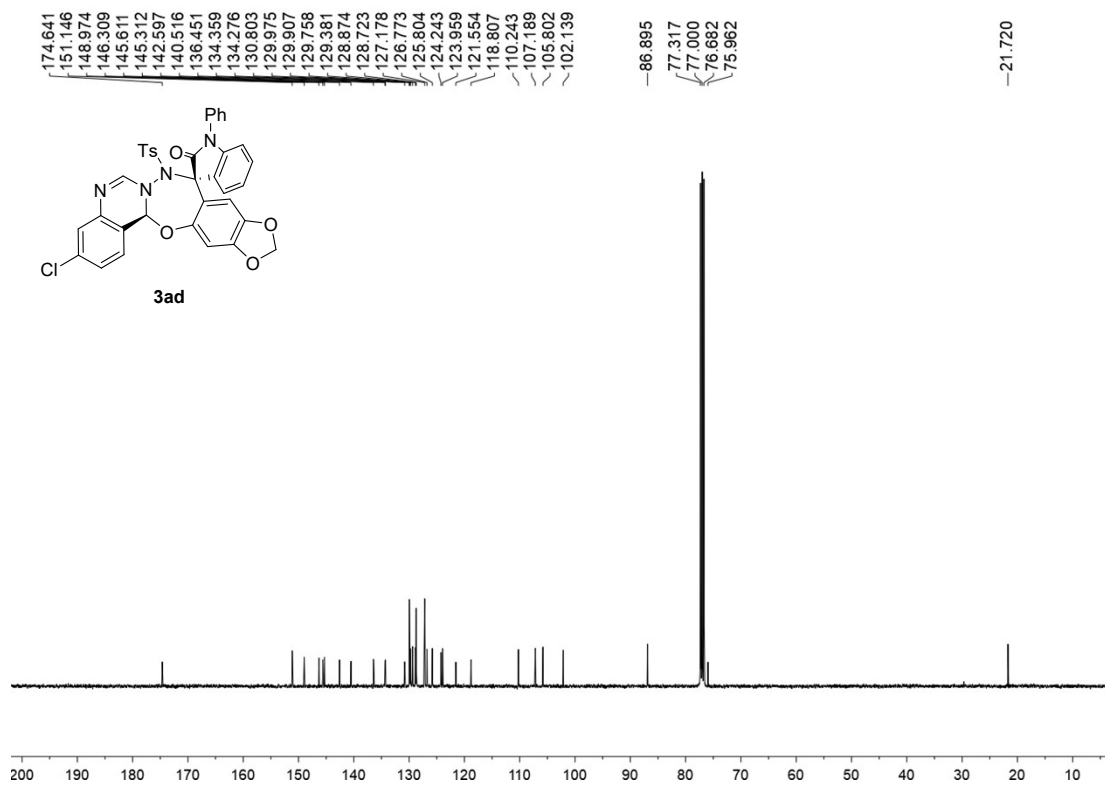



### HPLC Spectra of Compound 3ad

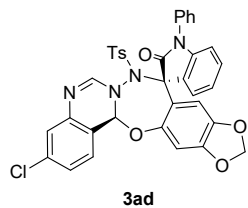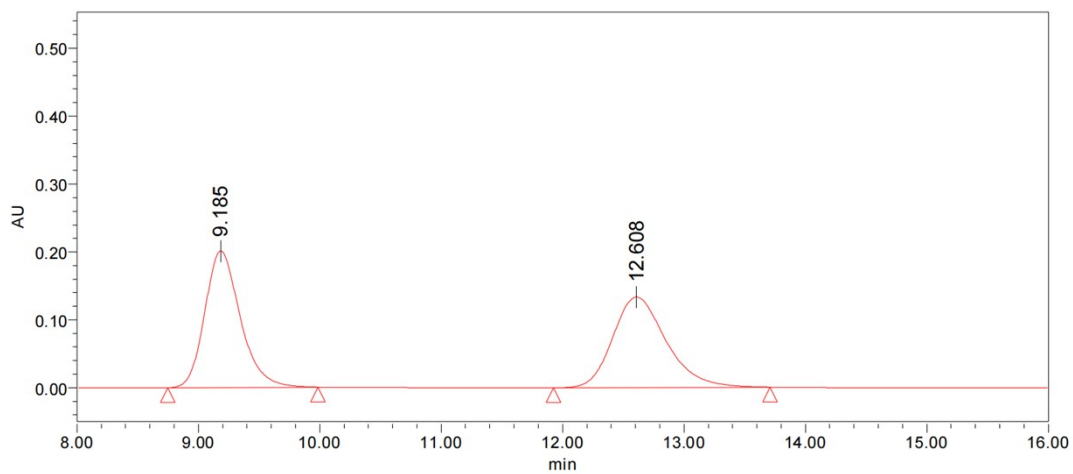

|   | RetTime [min] | Area [mAU*s] | Area% |
|---|---------------|--------------|-------|
| 1 | 9.185         | 4081746      | 50.07 |
| 2 | 12.608        | 4069646      | 49.93 |

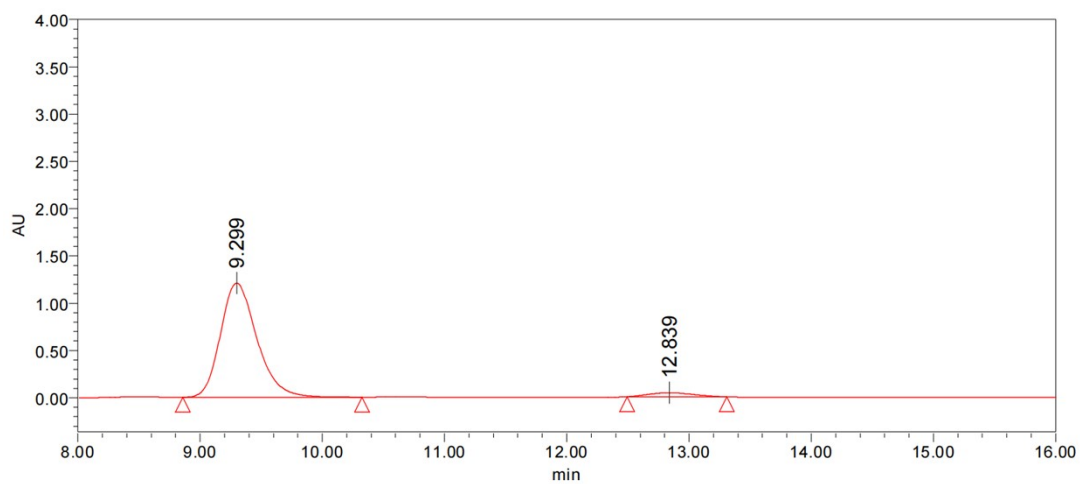

|   | RetTime [min] | Area [mAU*s] | Area% |
|---|---------------|--------------|-------|
| 1 | 9.299         | 25002255     | 95.86 |
| 2 | 12.839        | 1079133      | 4.14  |

<sup>1</sup>H NMR Spectrum of Compound **3ae** (400 MHz, CDCl<sub>3</sub>)

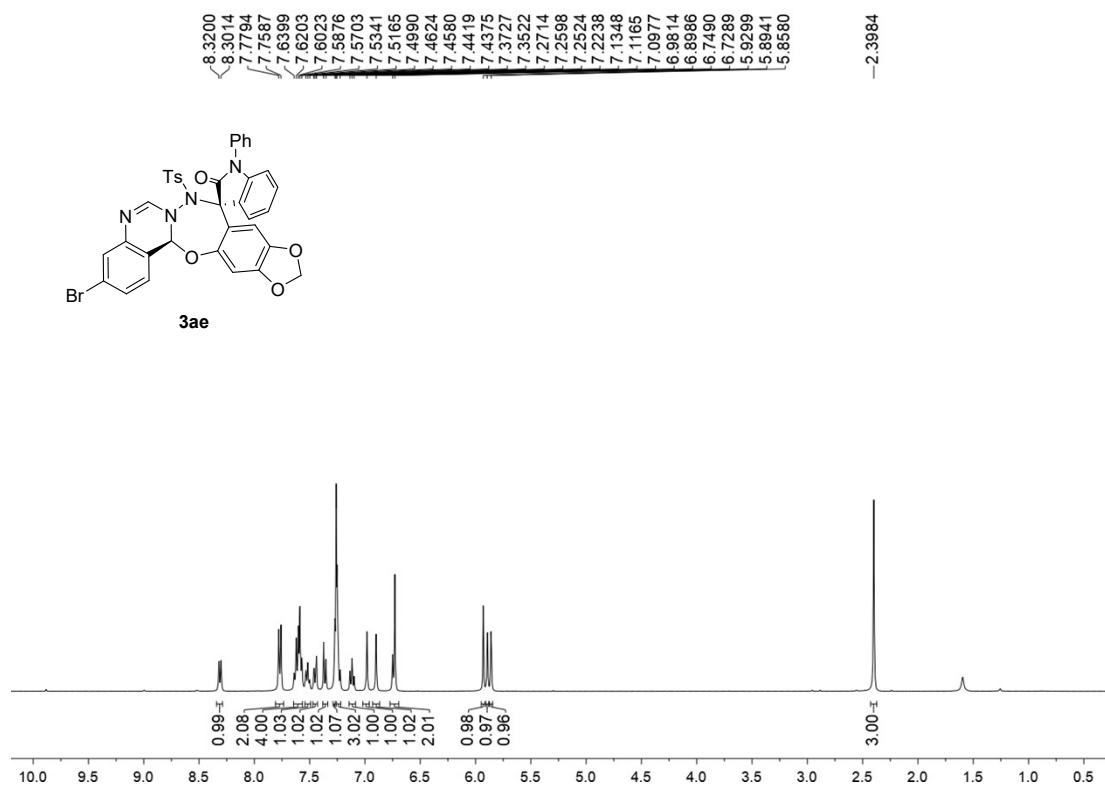

<sup>13</sup>C{<sup>1</sup>H} NMR Spectrum of Compound **3ae** (101 MHz, CDCl<sub>3</sub>)

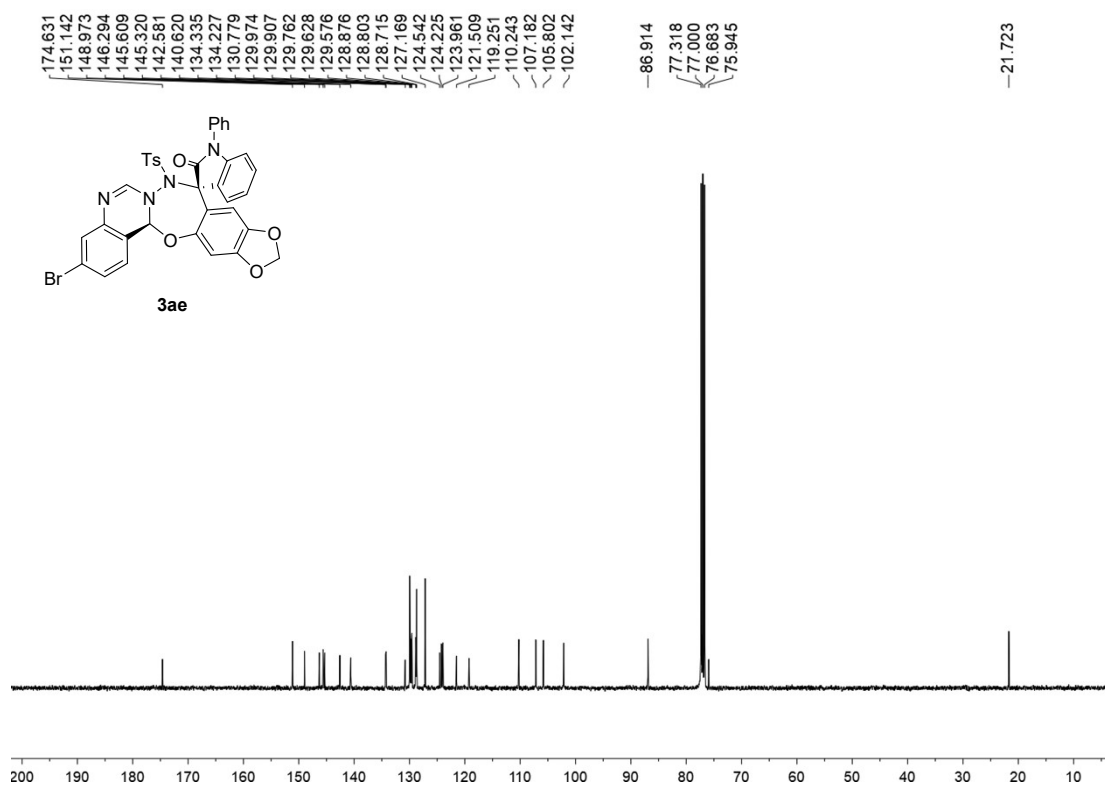

### HPLC Spectra of Compound **3ae**

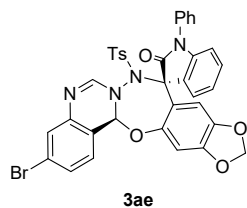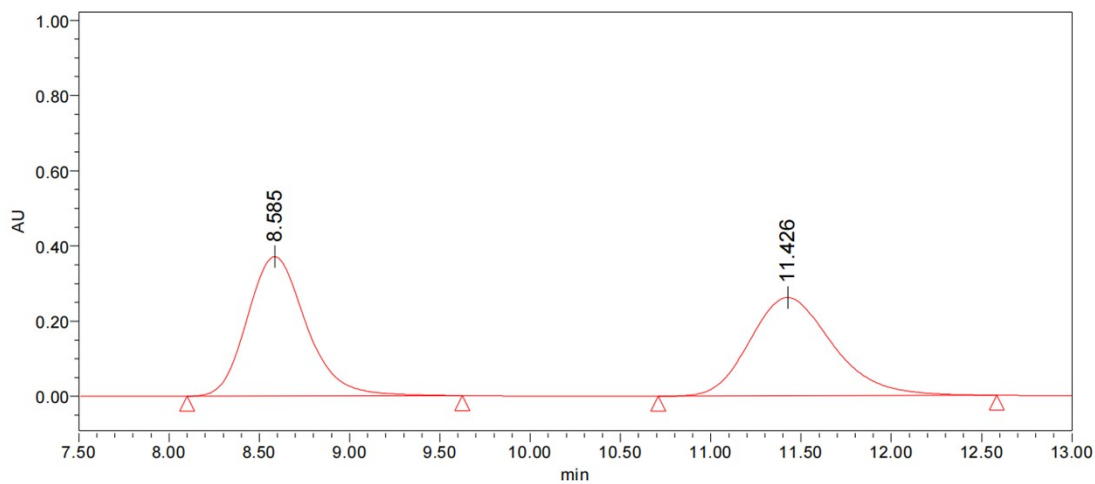

|   | RetTime [min] | Area [mAU*s] | Area% |
|---|---------------|--------------|-------|
| 1 | 8.585         | 8432968      | 50.29 |
| 2 | 11.426        | 8334585      | 49.71 |

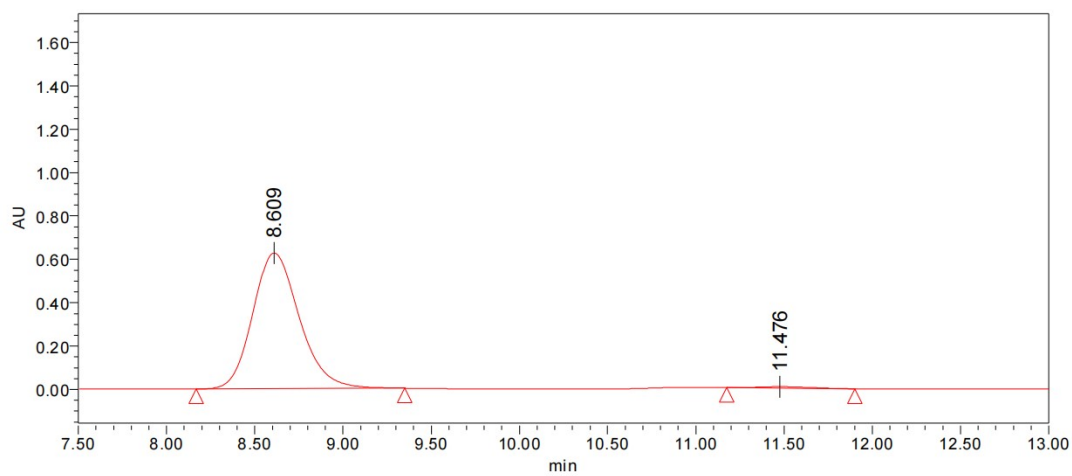

|   | RetTime [min] | Area [mAU*s] | Area% |
|---|---------------|--------------|-------|
| 1 | 8.609         | 11501124     | 98.77 |
| 2 | 11.476        | 143803       | 1.23  |

<sup>1</sup>H NMR Spectrum of Compound **3af** (400 MHz, CDCl<sub>3</sub>)

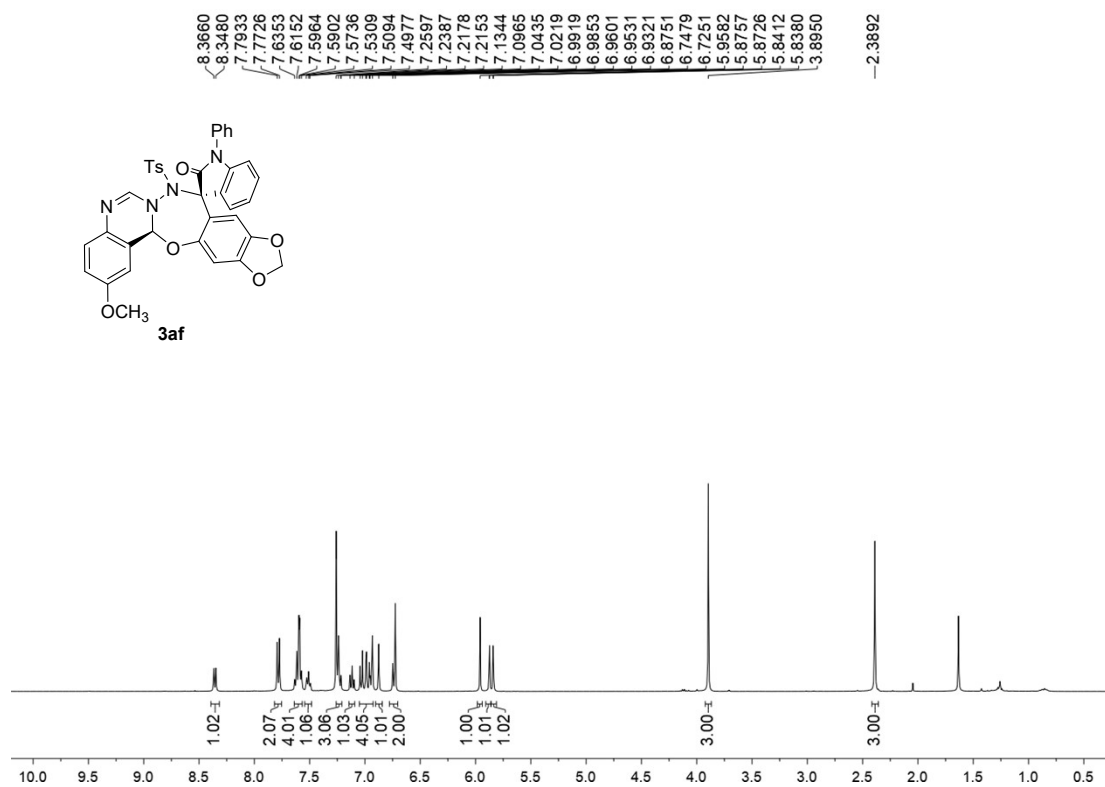

<sup>13</sup>C{<sup>1</sup>H} NMR Spectrum of Compound **3af** (101 MHz, CDCl<sub>3</sub>)

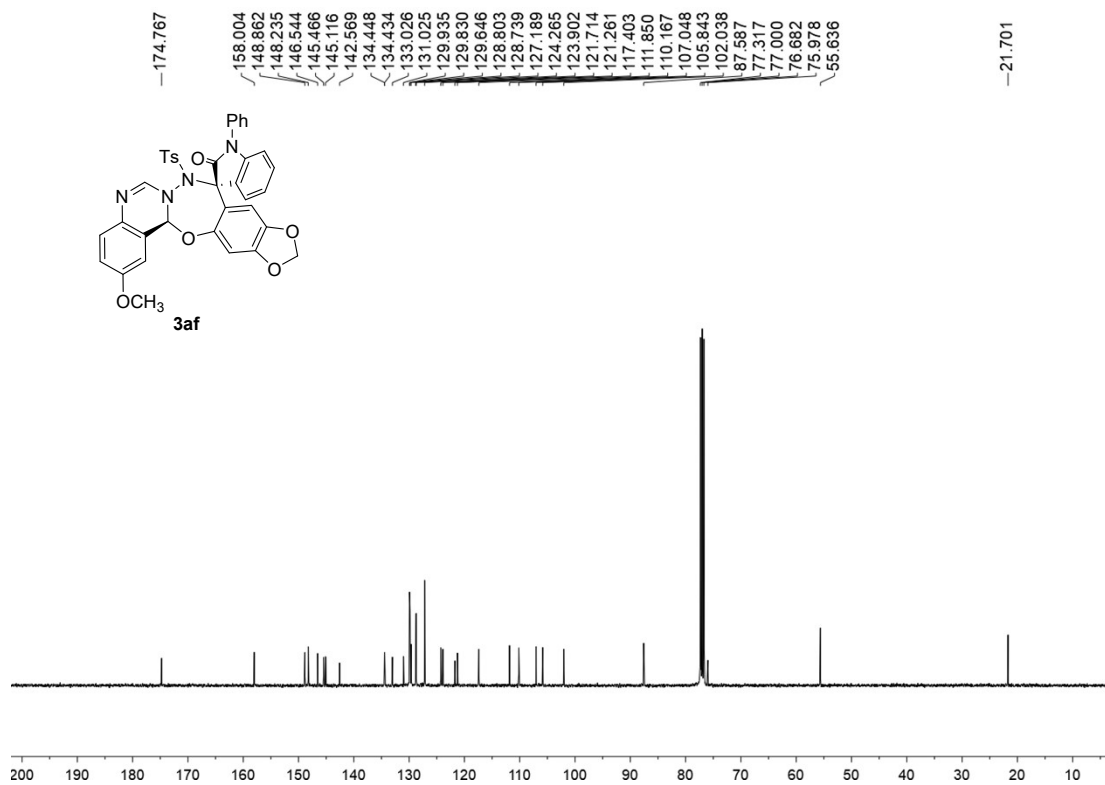

### HPLC Spectra of Compound 3af

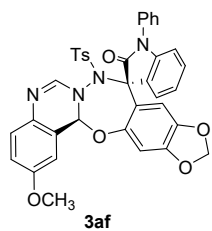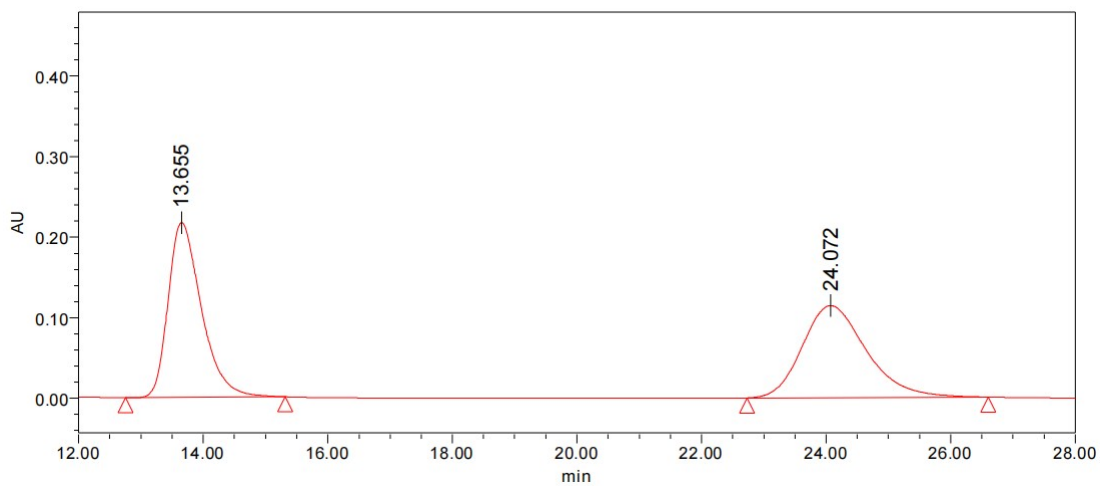

|   | RetTime [min] | Area [mAU*s] | Area% |
|---|---------------|--------------|-------|
| 1 | 13.655        | 8059090      | 49.71 |
| 2 | 24.072        | 8151870      | 50.29 |

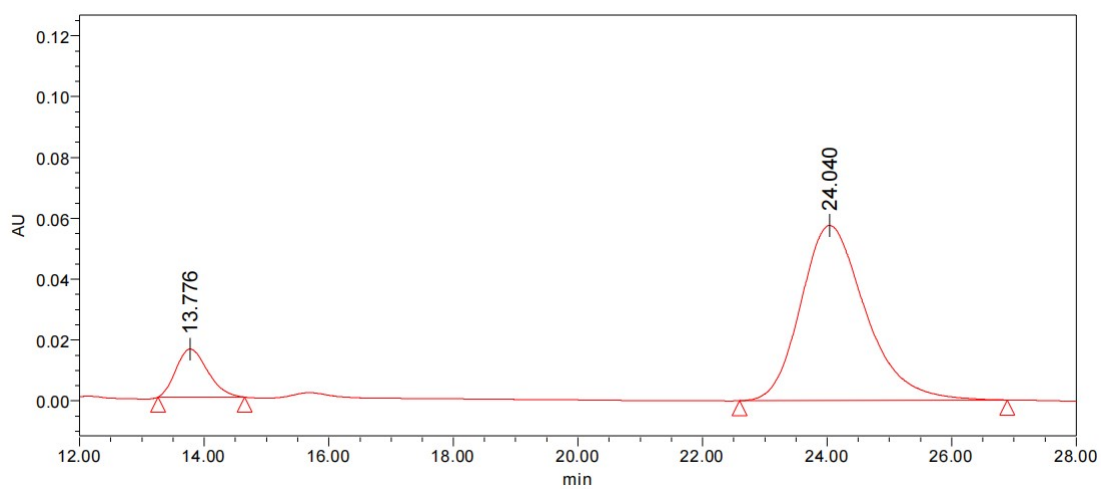

|   | RetTime [min] | Area [mAU*s] | Area% |
|---|---------------|--------------|-------|
| 1 | 13.776        | 555223       | 11.78 |
| 2 | 24.040        | 4158865      | 88.22 |

<sup>1</sup>H NMR Spectrum of Compound **3ag** (400 MHz, CDCl<sub>3</sub>)

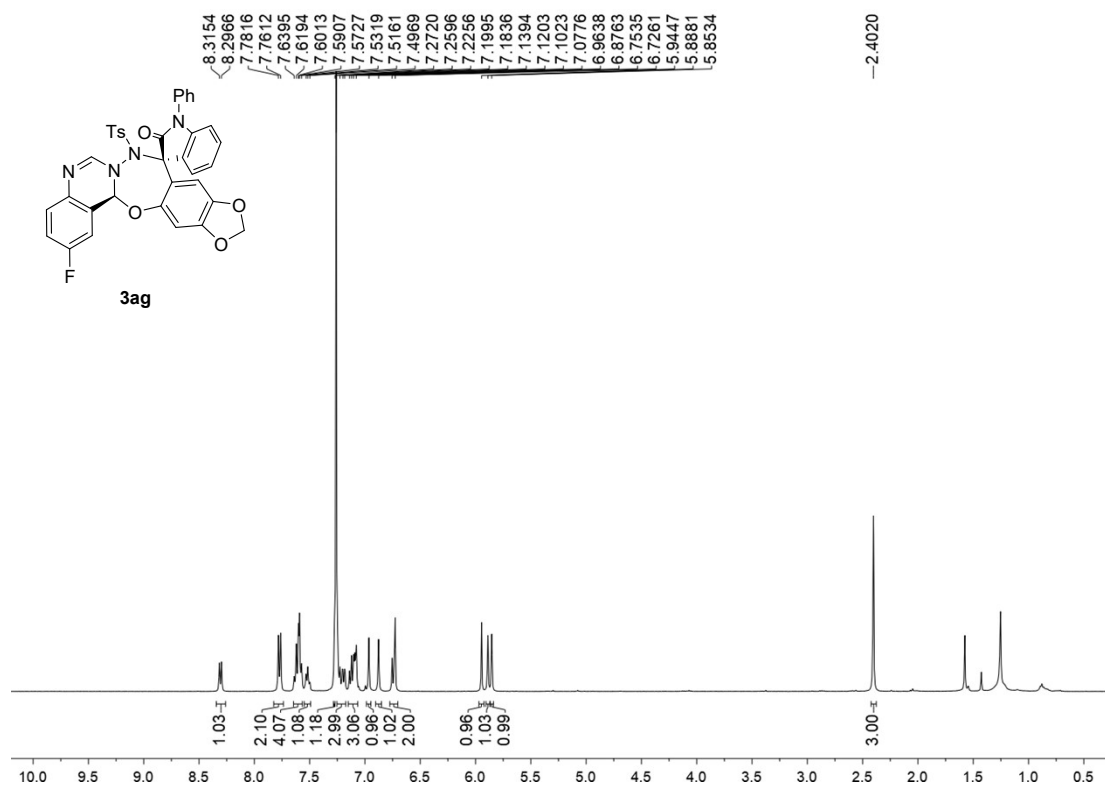

<sup>13</sup>C{<sup>1</sup>H} NMR Spectrum of Compound **3ag** (101 MHz, CDCl<sub>3</sub>)

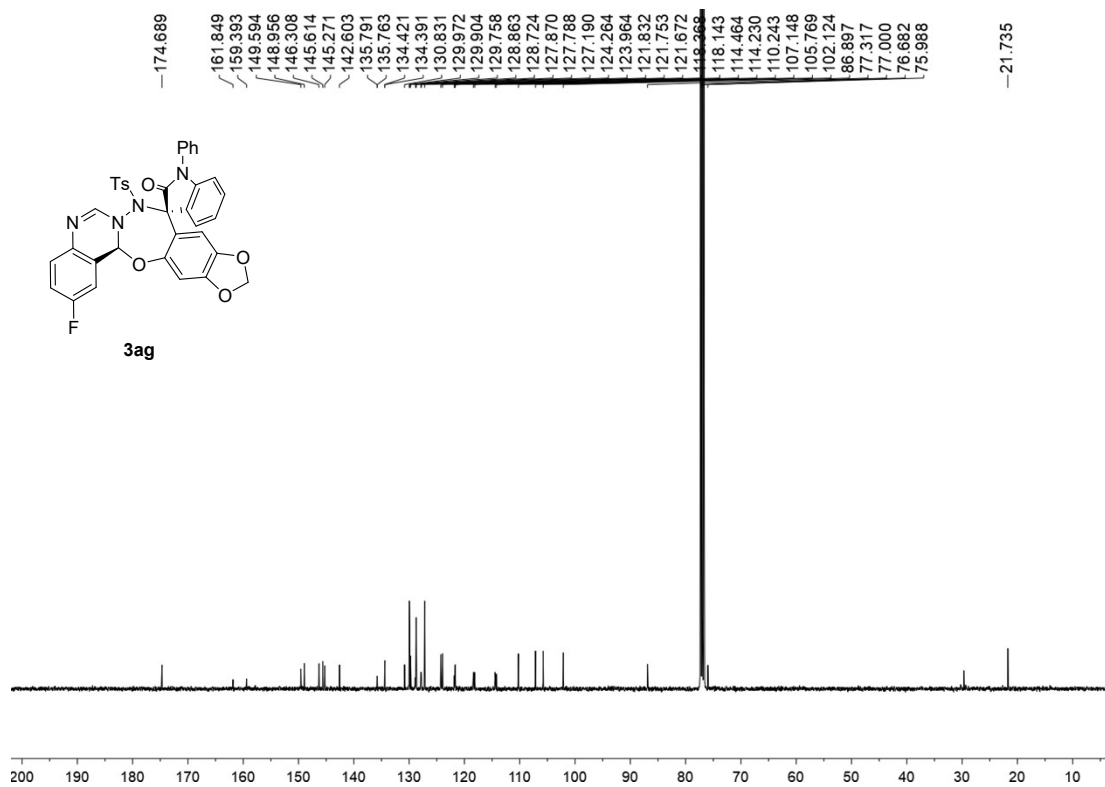

### HPLC Spectra of Compound **3ag**

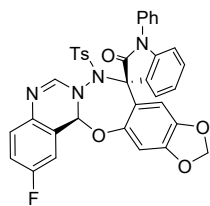

**3ag**

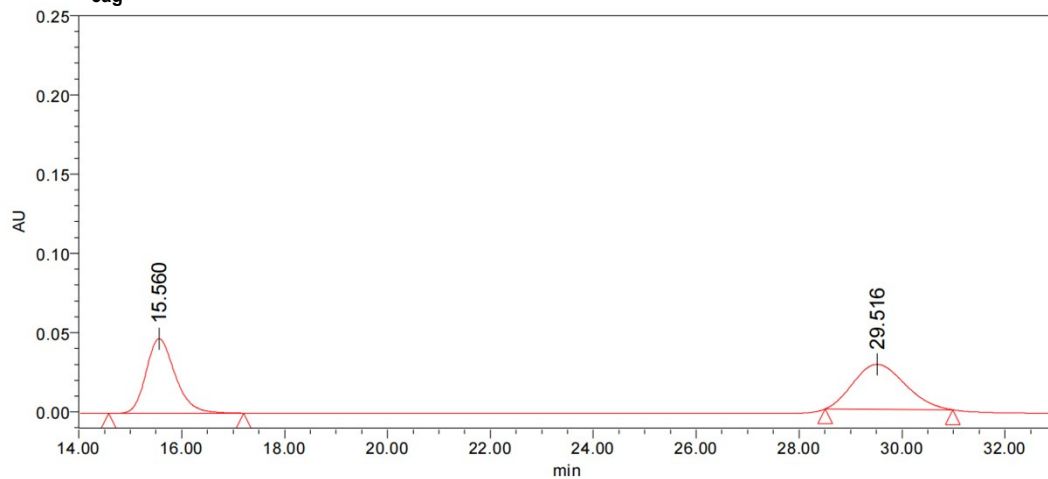

|   | RetTime [min] | Area [mAU*s] | Area% |
|---|---------------|--------------|-------|
| 1 | 15.560        | 1841510      | 48.21 |
| 2 | 29.516        | 1978420      | 51.79 |

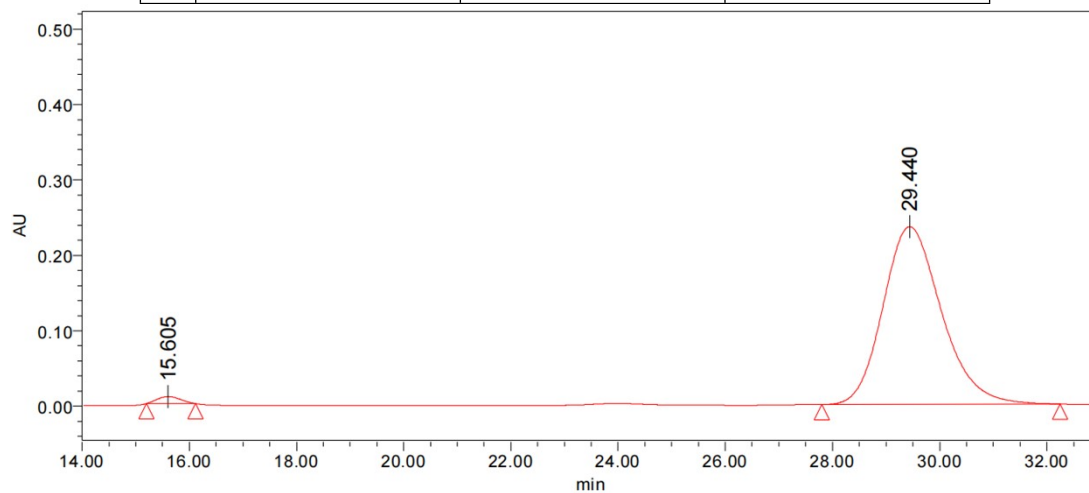

|   | RetTime [min] | Area [mAU*s] | Area% |
|---|---------------|--------------|-------|
| 1 | 15.605        | 282224       | 1.55  |
| 2 | 29.440        | 17869788     | 98.45 |

<sup>1</sup>H NMR Spectrum of Compound **3ah** (400 MHz, CDCl<sub>3</sub>)

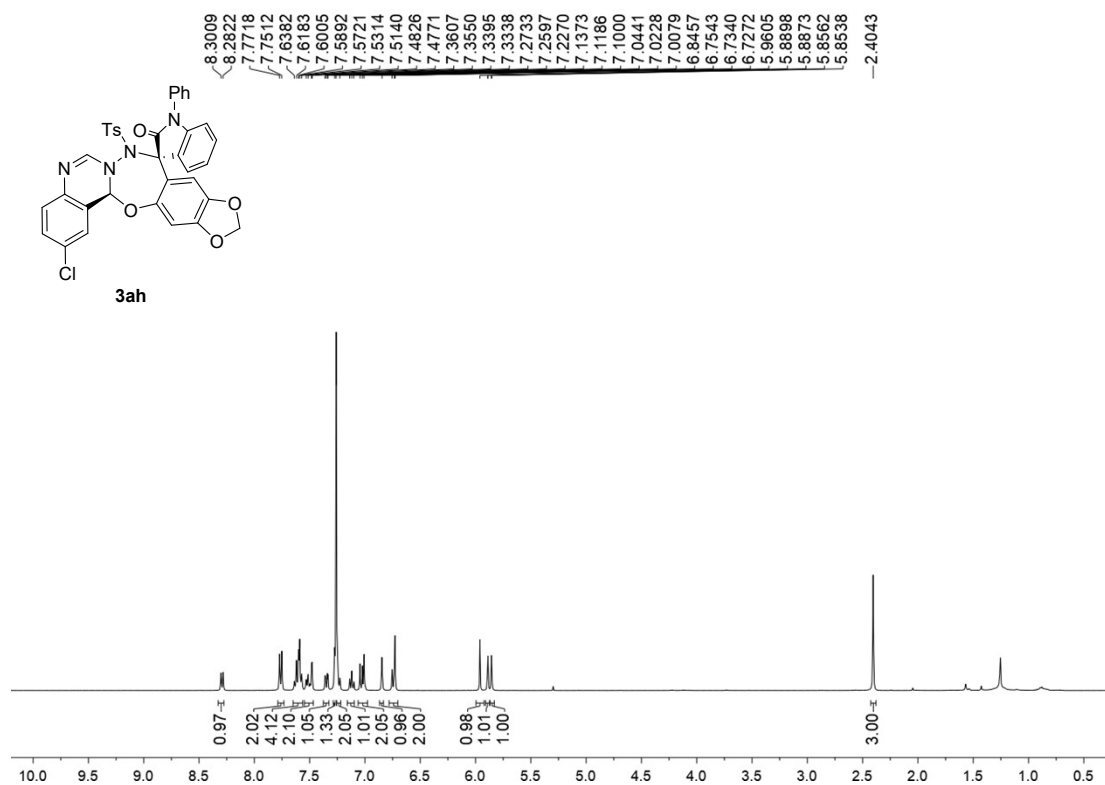

<sup>13</sup>C{<sup>1</sup>H} NMR Spectrum of Compound **3ah** (101 MHz, CDCl<sub>3</sub>)

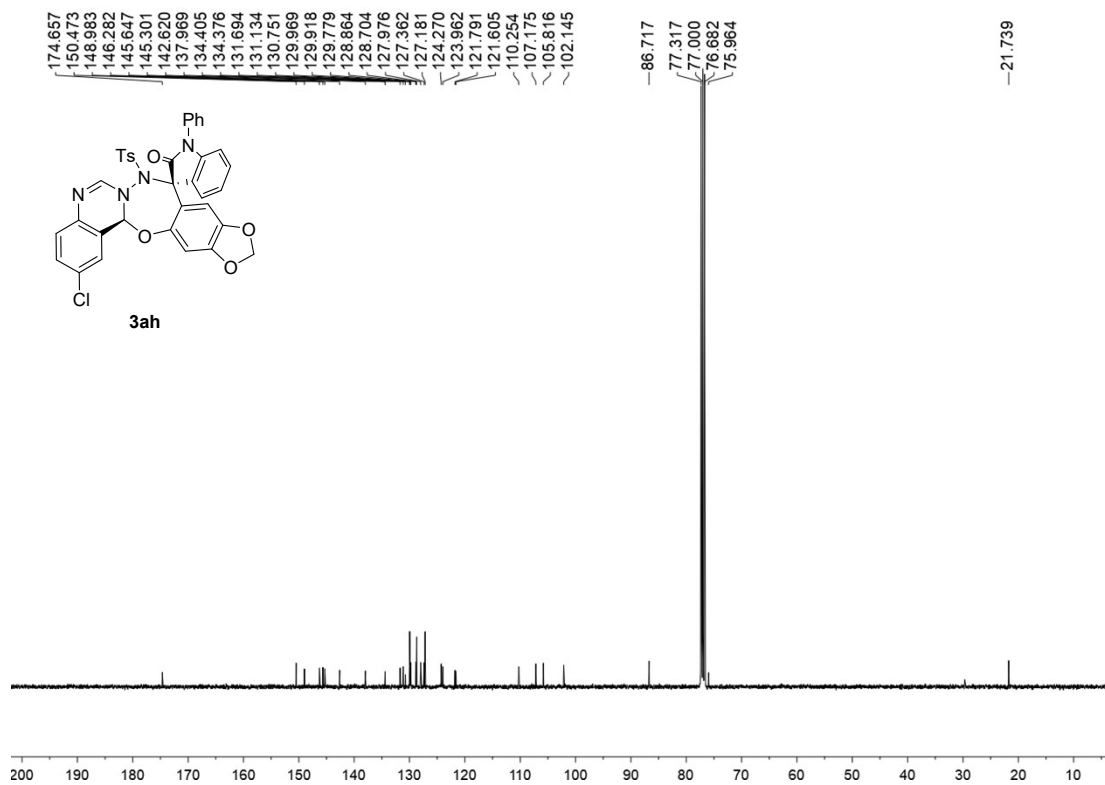



### HPLC Spectra of Compound 3ah

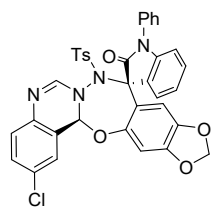

**3ah**

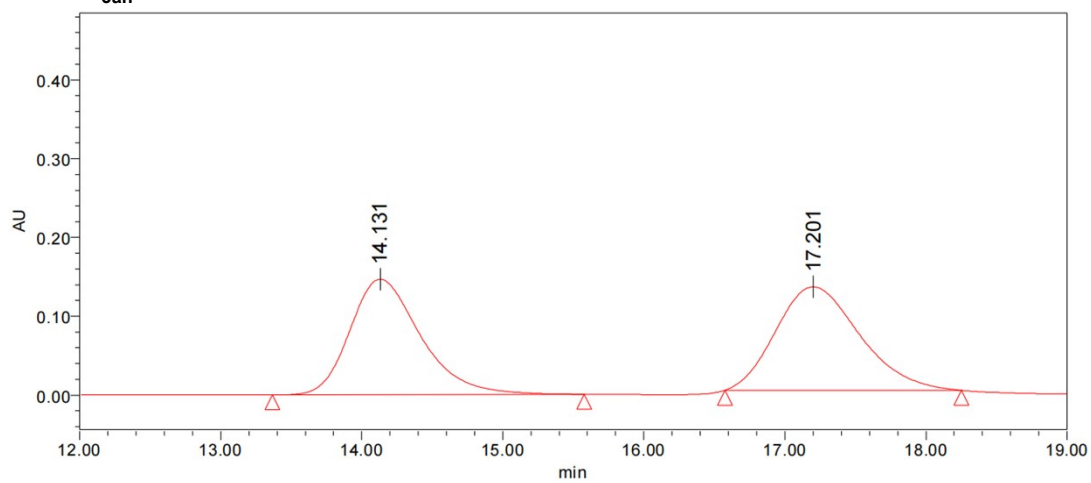

|   | RetTime [min] | Area [mAU*s] | Area% |
|---|---------------|--------------|-------|
| 1 | 14.131        | 5106431      | 48.47 |
| 2 | 17.201        | 5429092      | 51.53 |

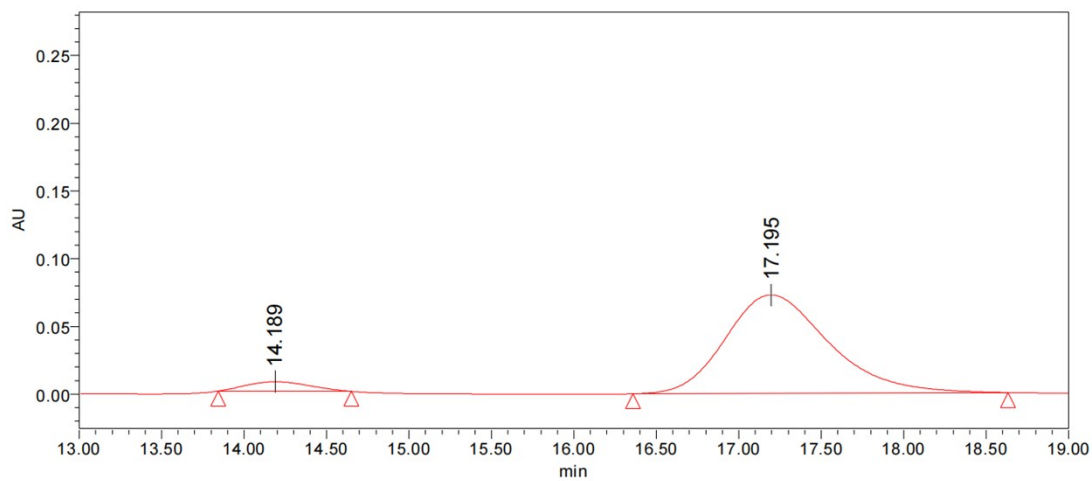

|   | RetTime [min] | Area [mAU*s] | Area% |
|---|---------------|--------------|-------|
| 1 | 14.189        | 185896       | 5.54  |
| 2 | 17.195        | 3166749      | 94.46 |

<sup>1</sup>H NMR Spectrum of Compound **3ai** (400 MHz, CDCl<sub>3</sub>)

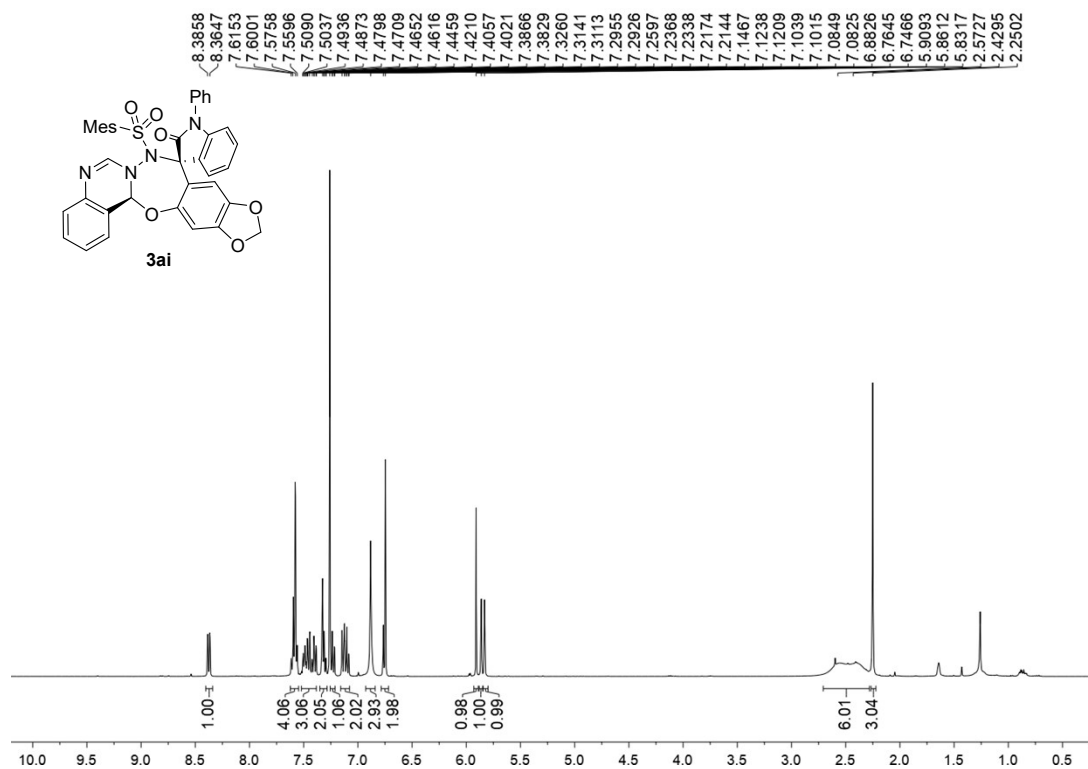

<sup>13</sup>C{<sup>1</sup>H} NMR Spectrum of Compound **3ai** (101 MHz, CDCl<sub>3</sub>)

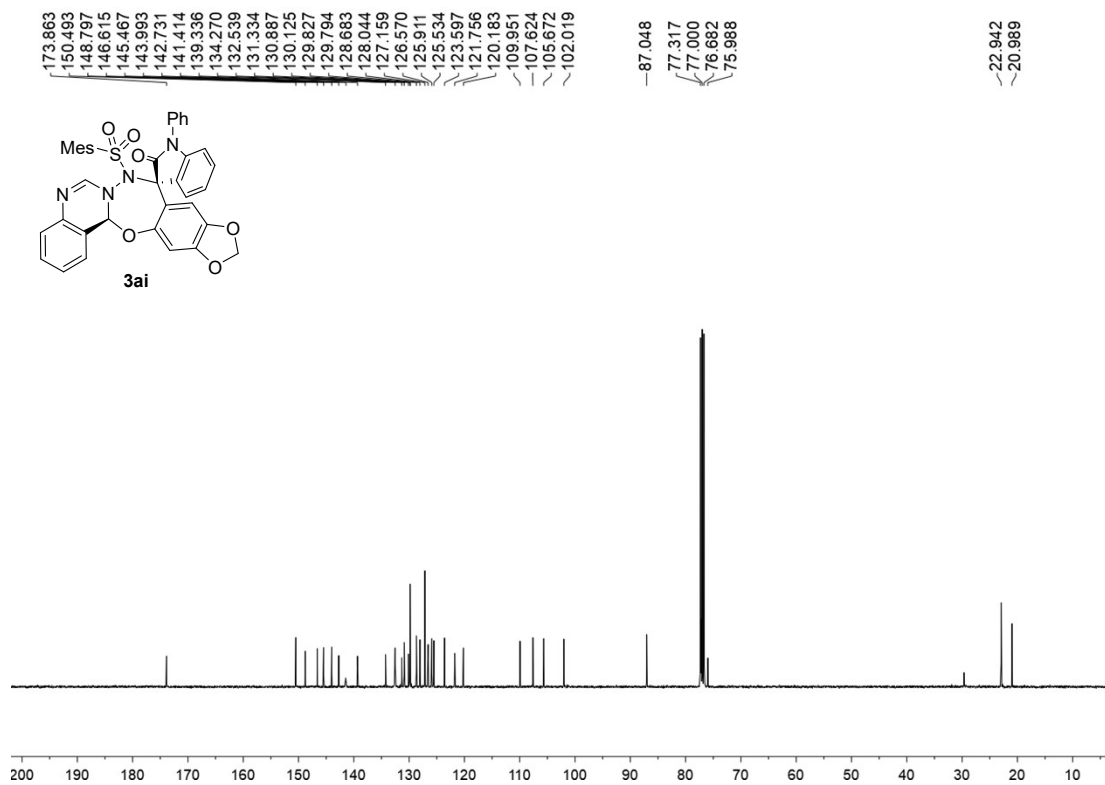

### HPLC Spectra of Compound **3ai**

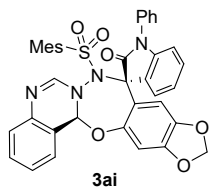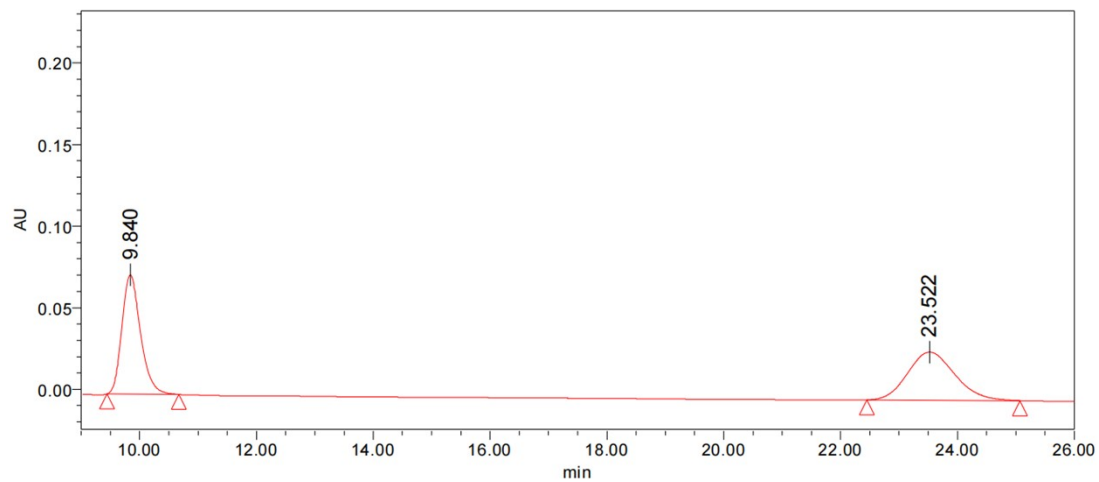

|   | RetTime [min] | Area [mAU*s] | Area% |
|---|---------------|--------------|-------|
| 1 | 9.840         | 1623388      | 49.54 |
| 2 | 23.522        | 1653754      | 50.46 |

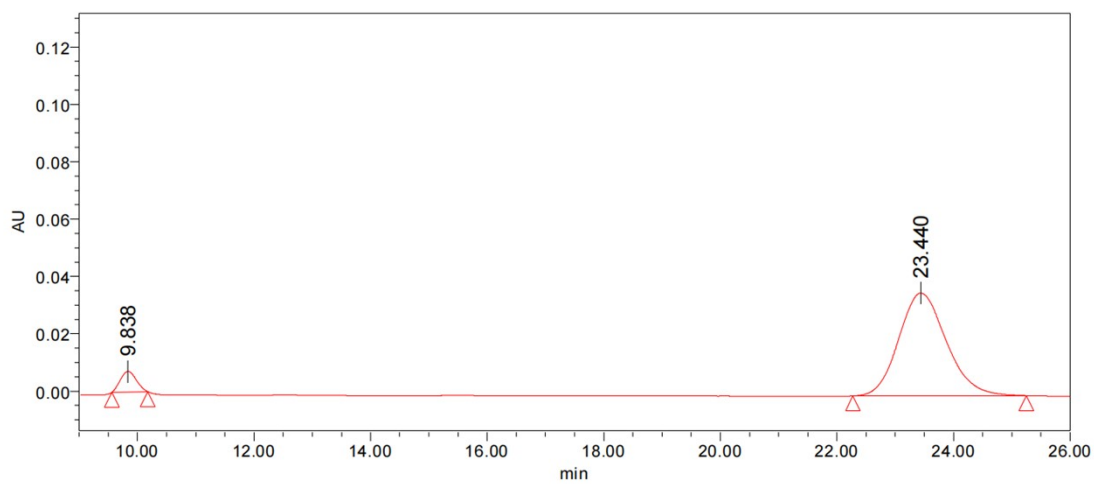

|   | RetTime [min] | Area [mAU*s] | Area% |
|---|---------------|--------------|-------|
| 1 | 9.838         | 136139       | 6.29  |
| 2 | 23.440        | 2028099      | 93.71 |

<sup>1</sup>H NMR Spectrum of Compound **3aj** (400 MHz, CDCl<sub>3</sub>)

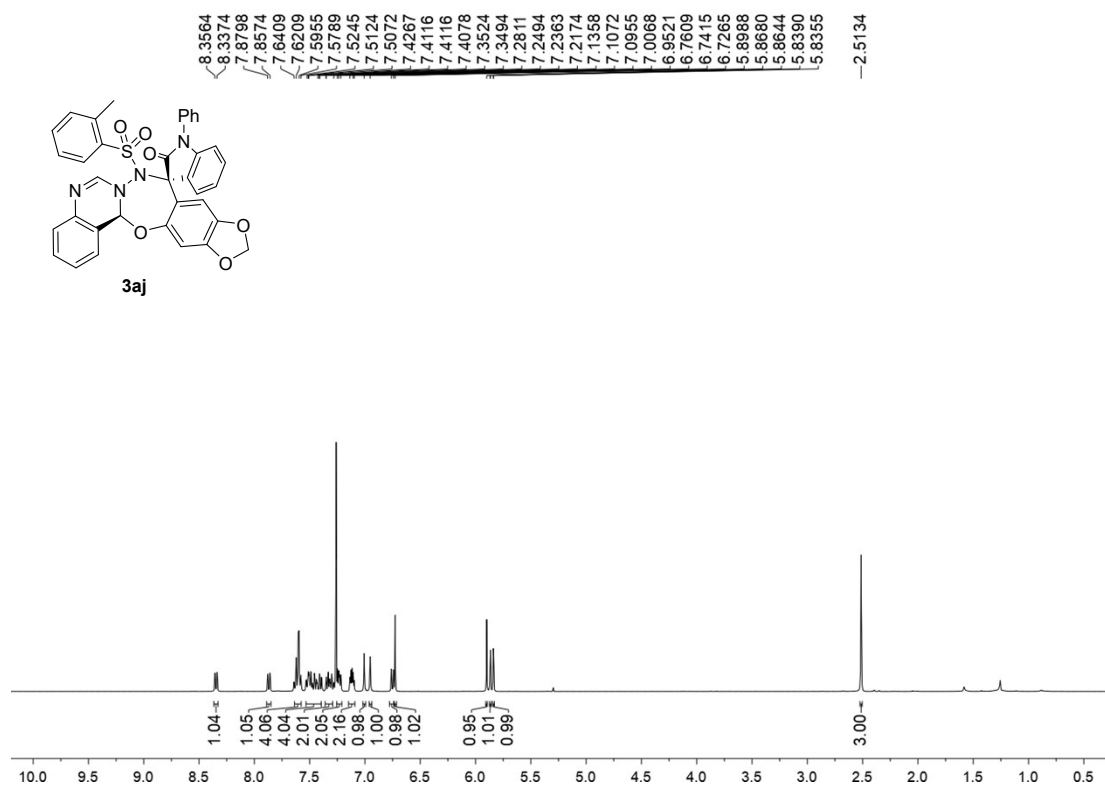

<sup>13</sup>C{<sup>1</sup>H} NMR Spectrum of Compound **3aj** (101 MHz, CDCl<sub>3</sub>)

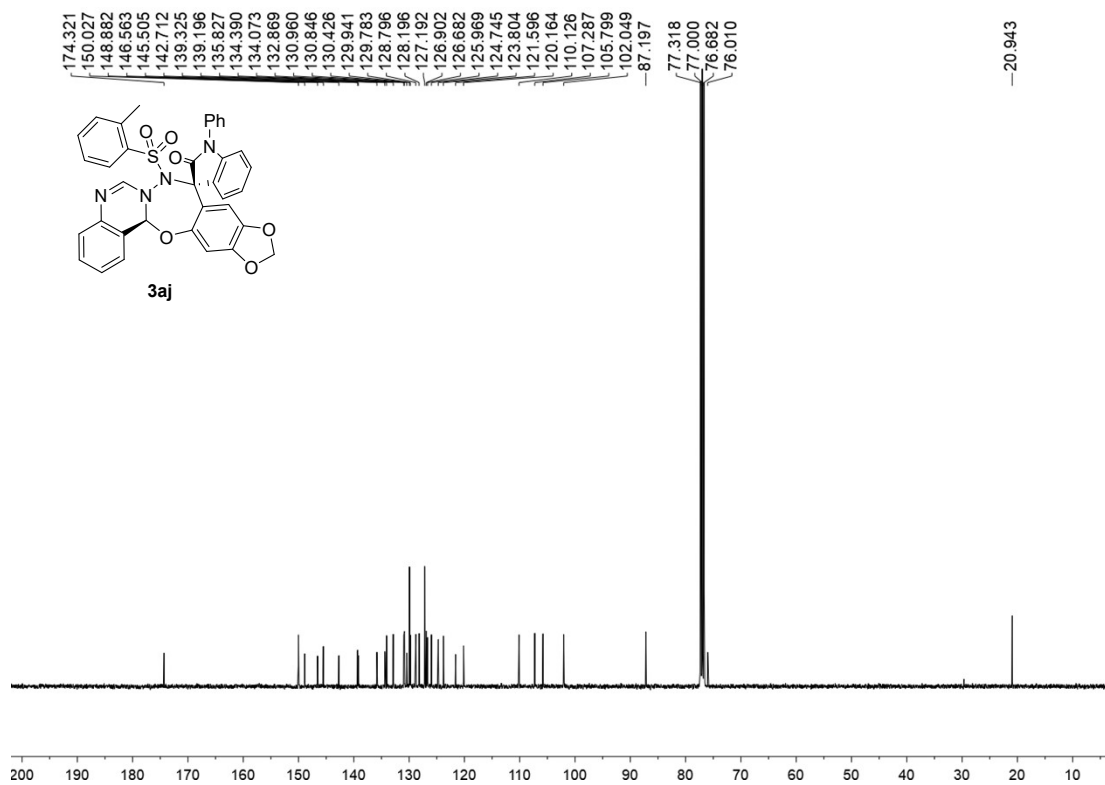

### HPLC Spectra of Compound 3aj

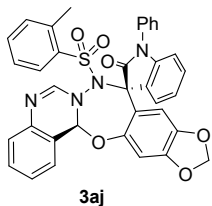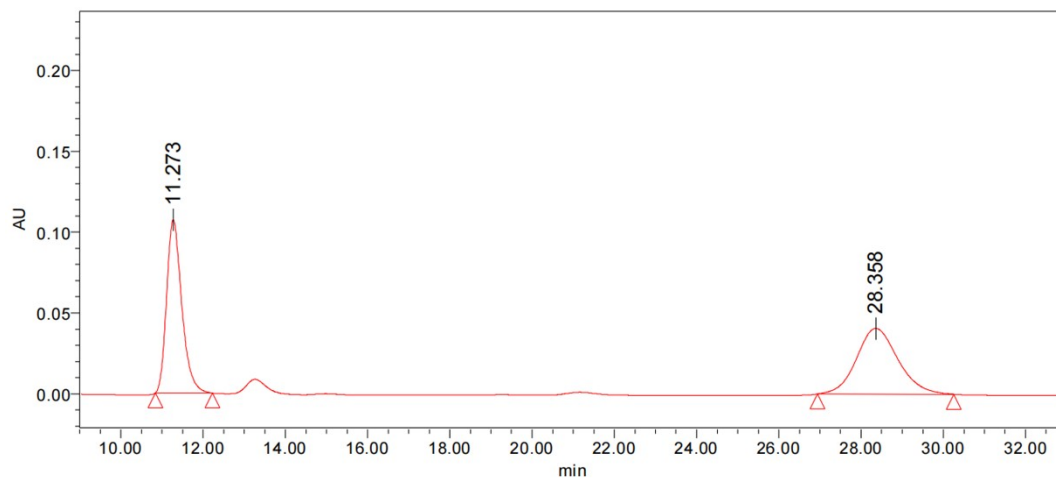

|   | RetTime [min] | Area [mAU*s] | Area% |
|---|---------------|--------------|-------|
| 1 | 11.273        | 2750344      | 49.16 |
| 2 | 28.358        | 2843834      | 50.84 |

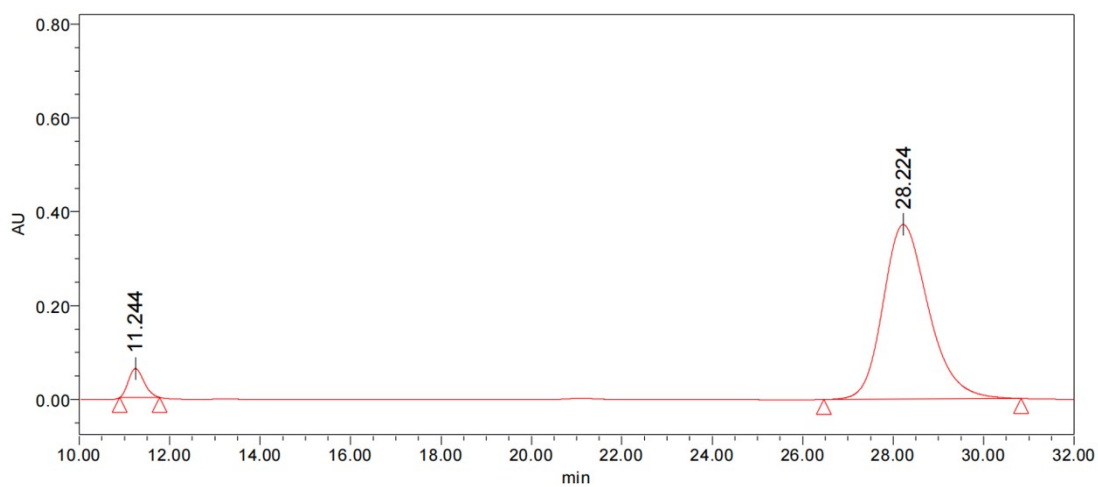

|   | RetTime [min] | Area [mAU*s] | Area% |
|---|---------------|--------------|-------|
| 1 | 11.244        | 1460567      | 5.32  |
| 2 | 28.224        | 25994948     | 94.68 |

<sup>1</sup>H NMR Spectrum of Compound **3ak** (400 MHz, CDCl<sub>3</sub>)

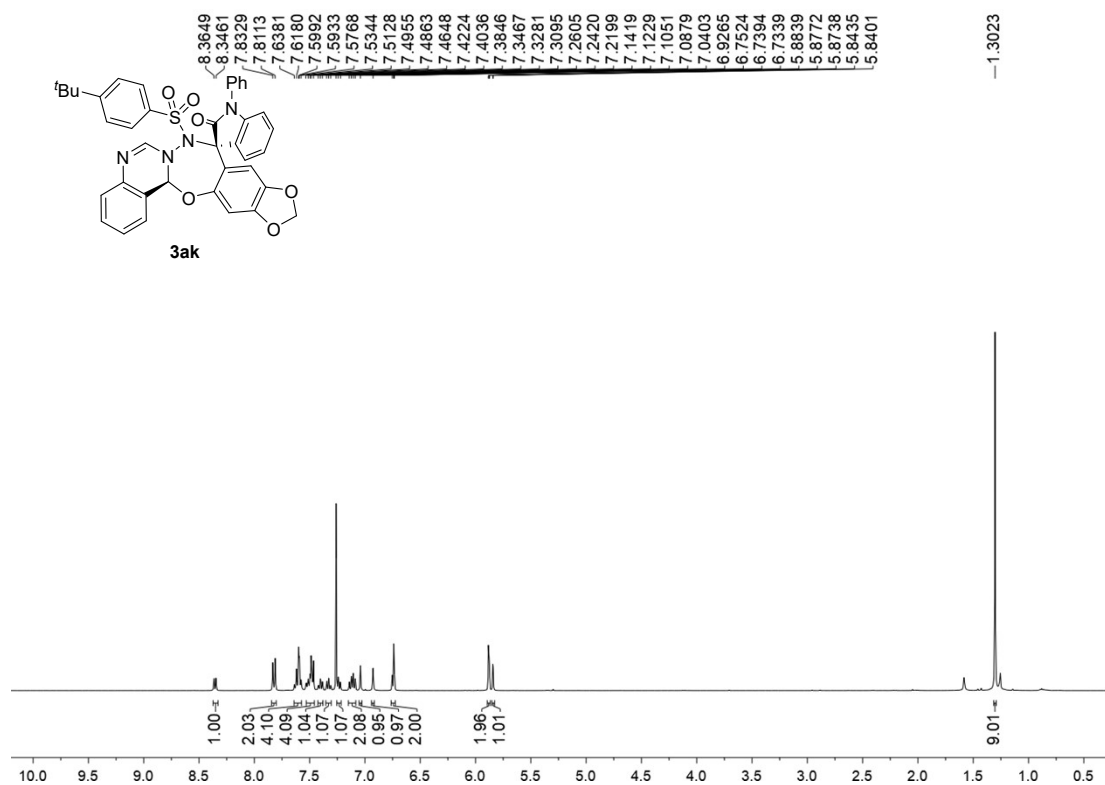

<sup>13</sup>C{<sup>1</sup>H} NMR Spectrum of Compound **3ak** (101 MHz, CDCl<sub>3</sub>)

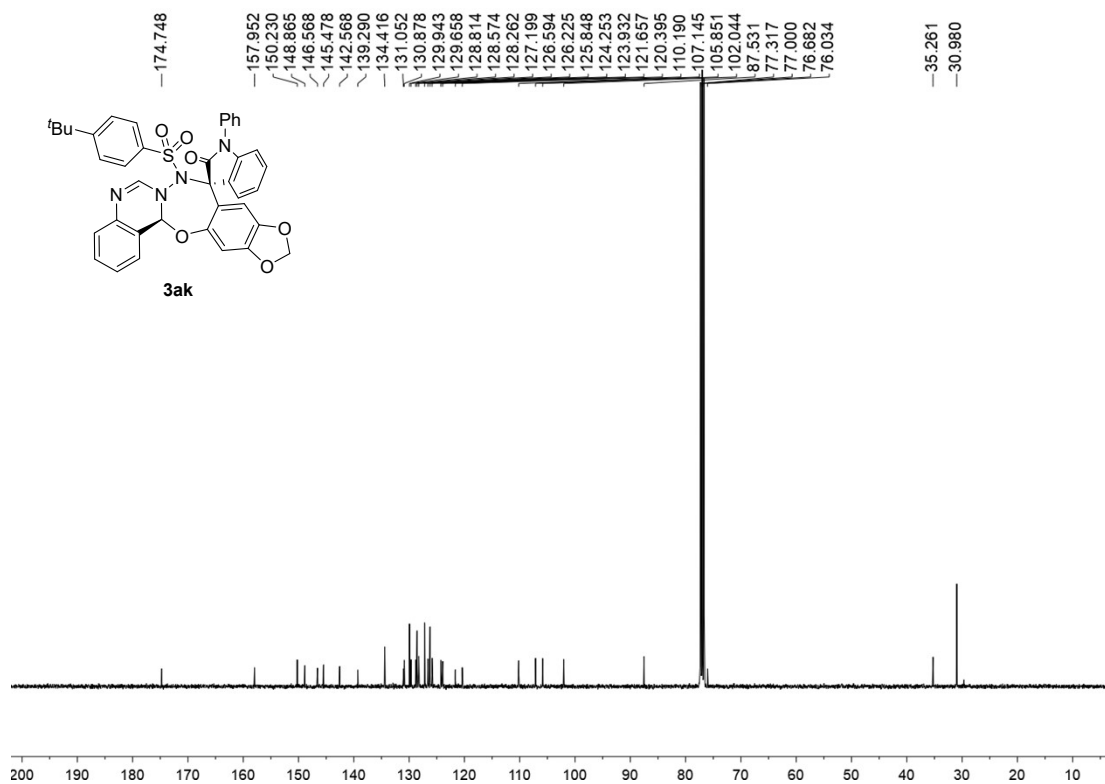

### HPLC Spectra of Compound **3ak**

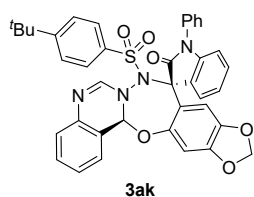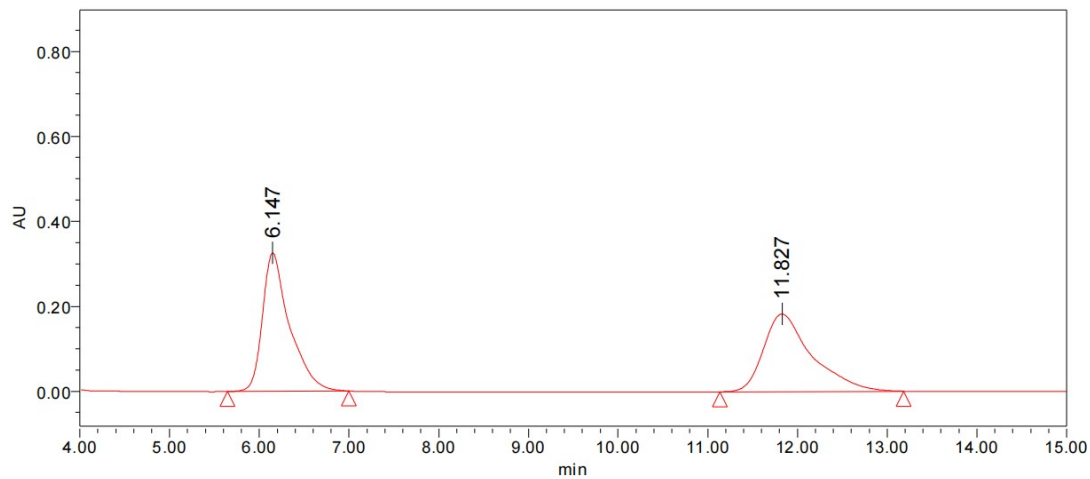

|   | RetTime [min] | Area [mAU*s] | Area% |
|---|---------------|--------------|-------|
| 1 | 6.147         | 6820793      | 50.07 |
| 2 | 11.827        | 6801762      | 49.93 |

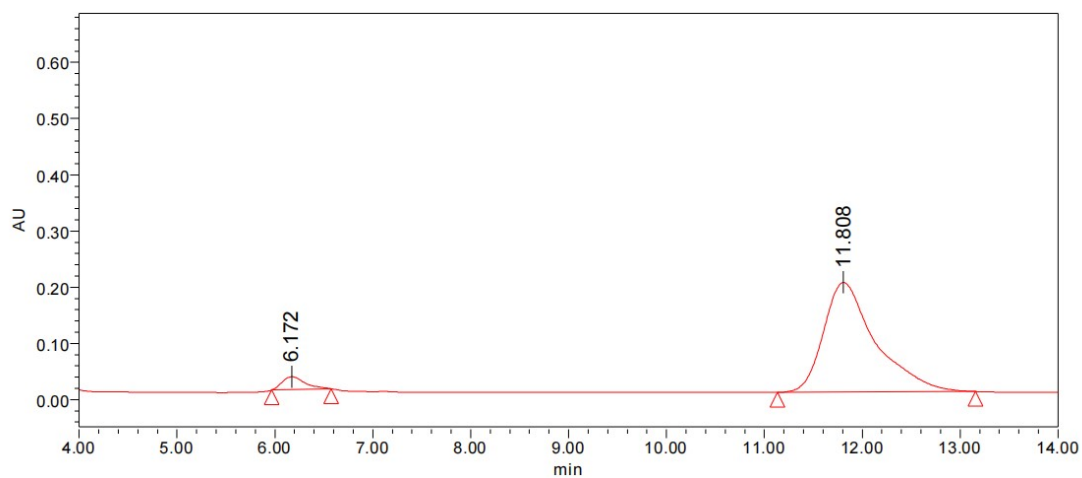

|   | RetTime [min] | Area [mAU*s] | Area% |
|---|---------------|--------------|-------|
| 1 | 6.172         | 368811       | 4.89  |
| 2 | 11.808        | 7177264      | 95.11 |

<sup>1</sup>H NMR Spectrum of Compound **3al** (400 MHz, CDCl<sub>3</sub>)

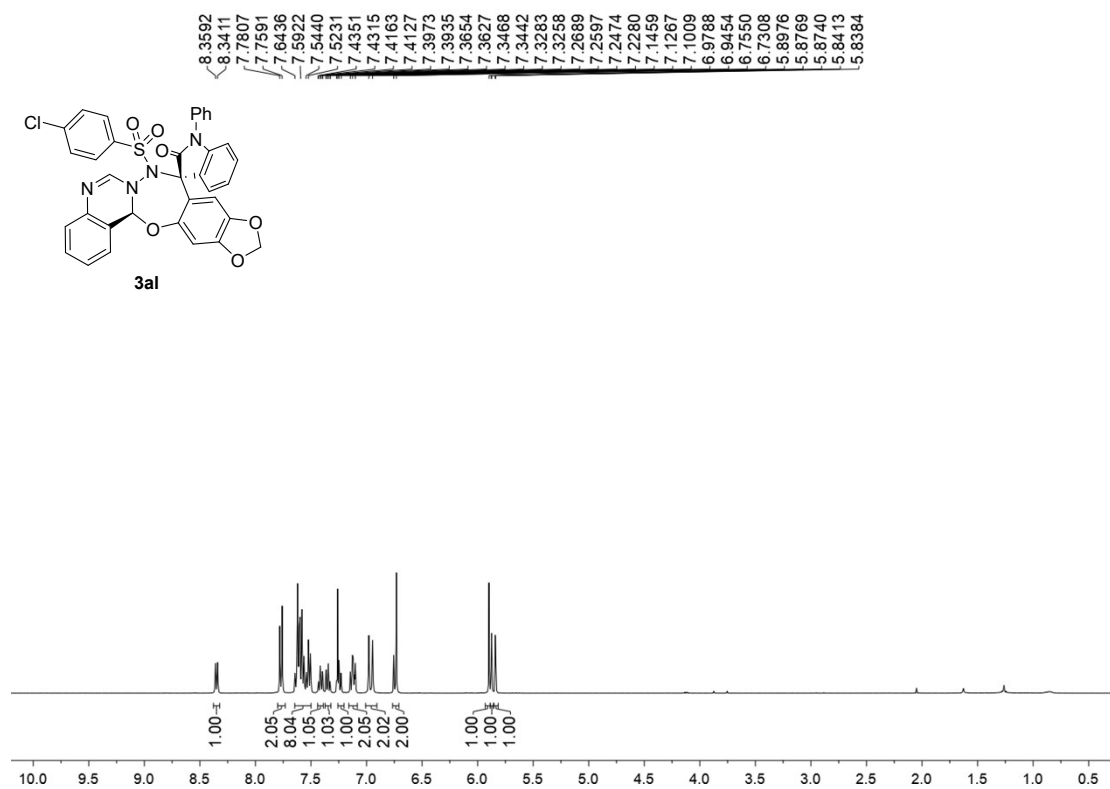

<sup>13</sup>C{<sup>1</sup>H} NMR Spectrum of Compound **3al** (101 MHz, CDCl<sub>3</sub>)

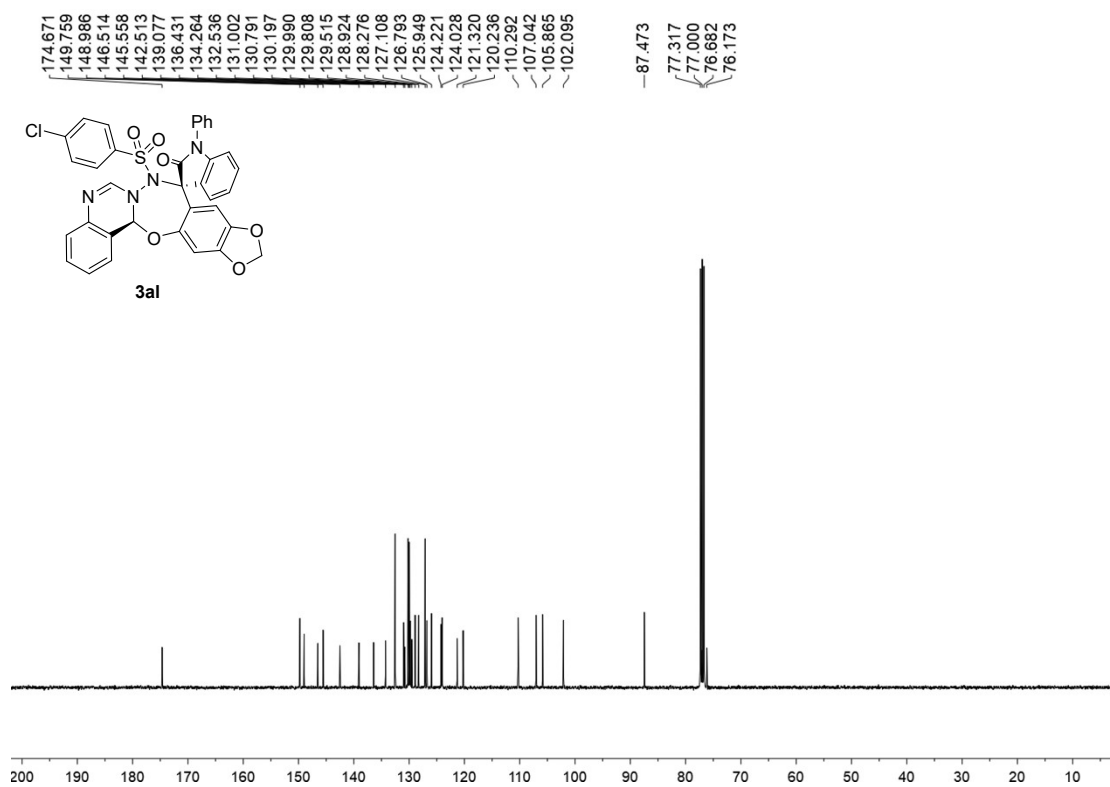



### HPLC Spectra of Compound **3al**

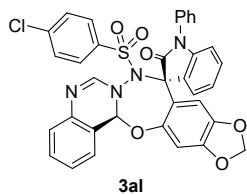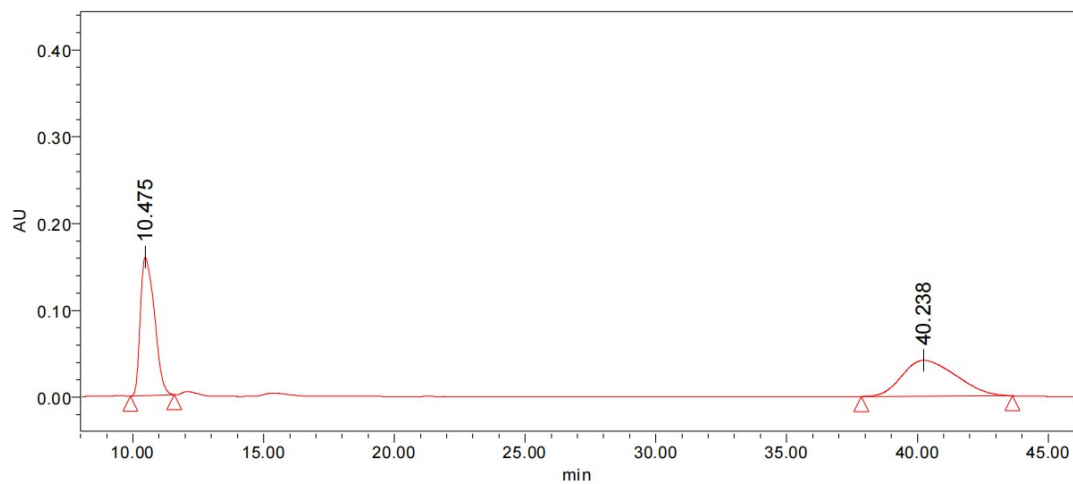

|   | RetTime [min] | Area [mAU*s] | Area% |
|---|---------------|--------------|-------|
| 1 | 10.475        | 5967069      | 50.20 |
| 2 | 40.238        | 5918655      | 49.80 |

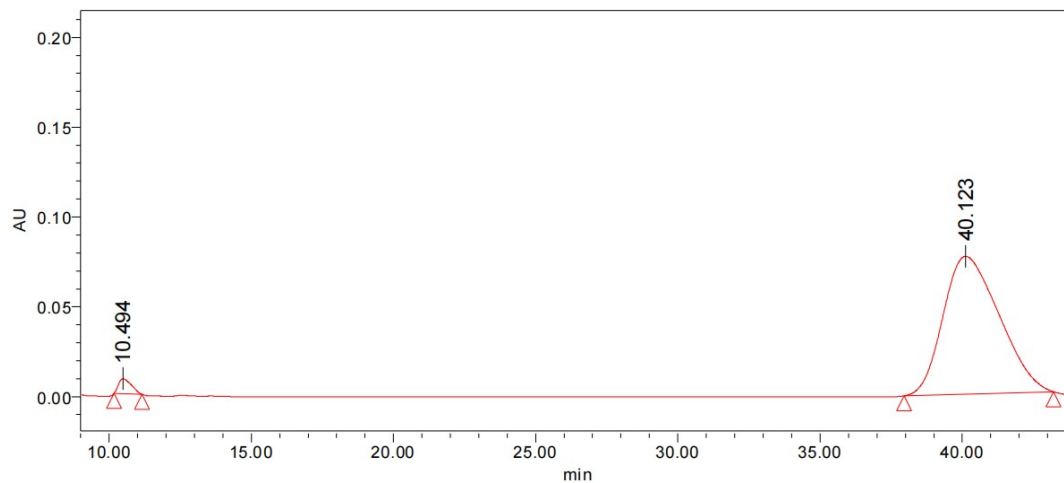

|   | RetTime [min] | Area [mAU*s] | Area% |
|---|---------------|--------------|-------|
| 1 | 10.494        | 262889       | 2.44  |
| 2 | 40.123        | 10497424     | 97.56 |

<sup>1</sup>H NMR Spectrum of Compound **3am** (400 MHz, CDCl<sub>3</sub>)

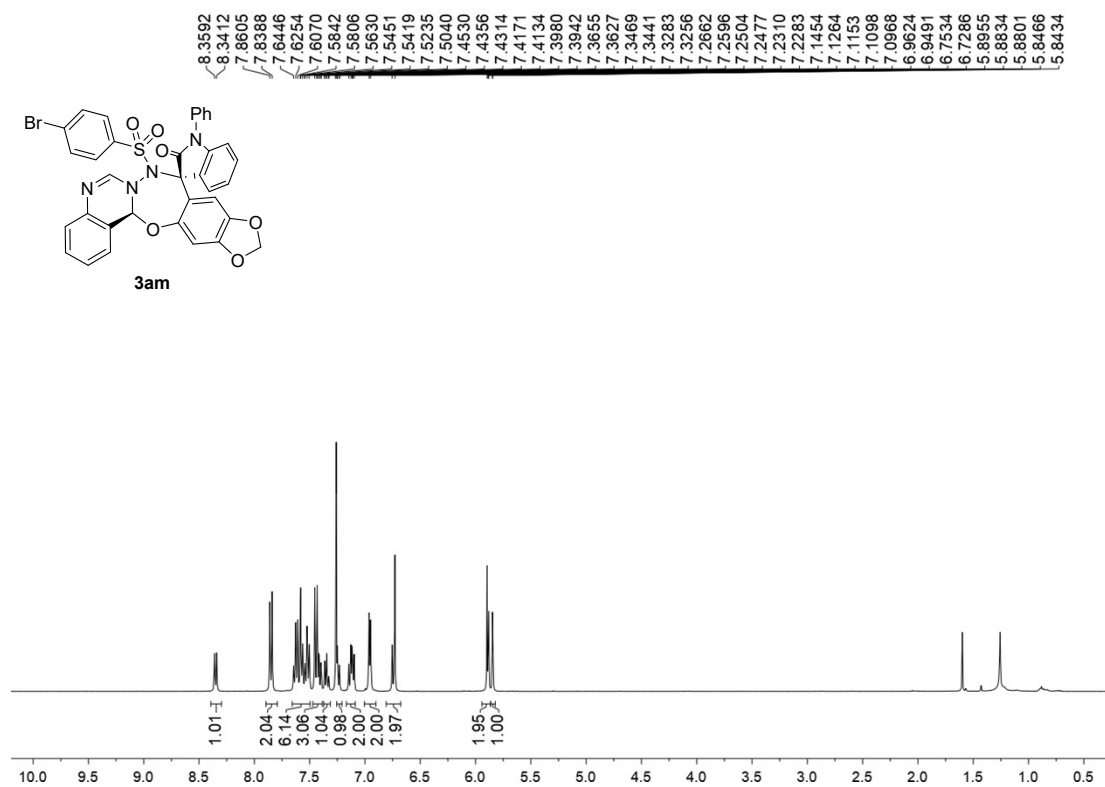

<sup>13</sup>C{<sup>1</sup>H} NMR Spectrum of Compound **3am** (101 MHz, CDCl<sub>3</sub>)

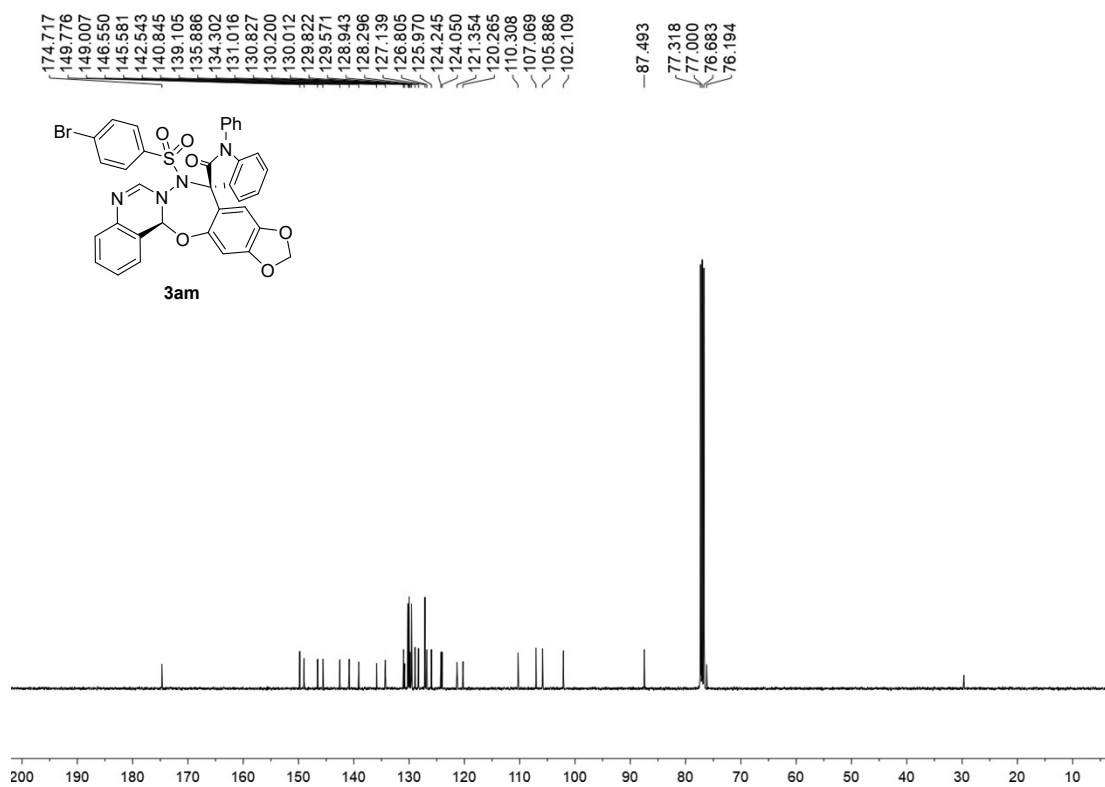

### HPLC Spectra of Compound **3am**

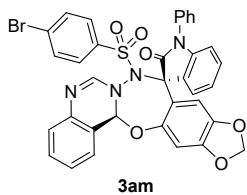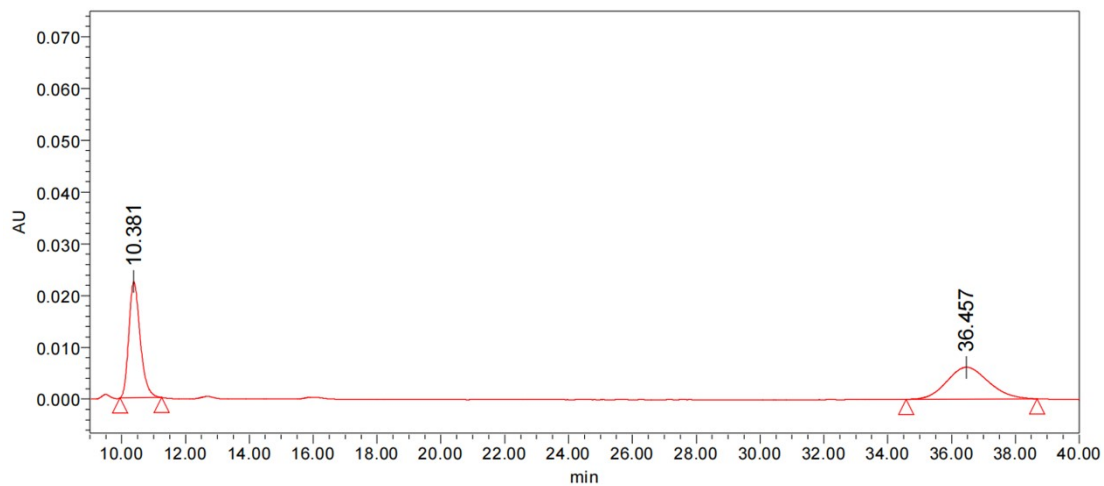

|   | RetTime [min] | Area [mAU*s] | Area% |
|---|---------------|--------------|-------|
| 1 | 10.381        | 556640       | 49.79 |
| 2 | 36.457        | 561280       | 50.21 |

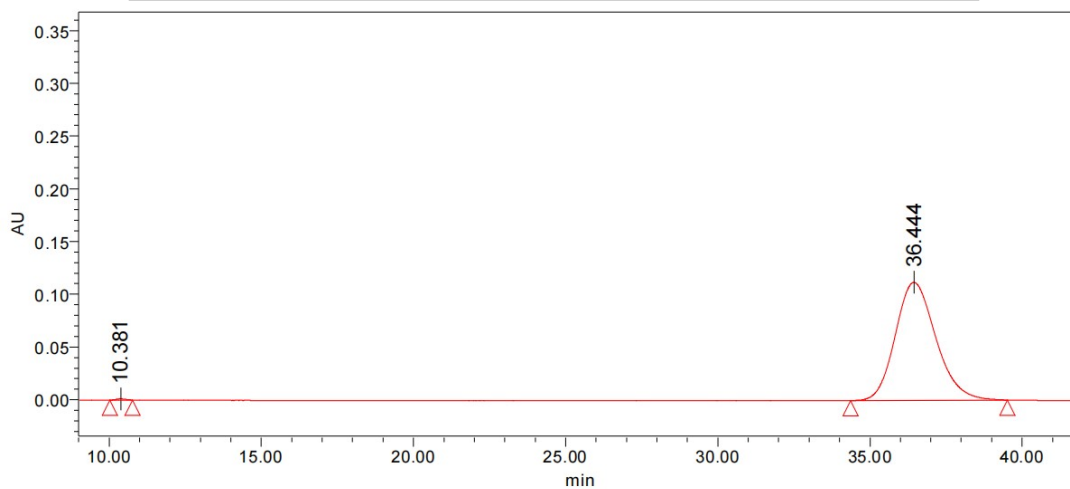

|   | RetTime [min] | Area [mAU*s] | Area% |
|---|---------------|--------------|-------|
| 1 | 10.381        | 22424        | 0.22  |
| 2 | 36.444        | 10356364     | 99.78 |
